# Supplementary material for: A Methodology for Evaluating Algorithms That Calculate Social Influence in Complex Social Networks
Source: Hindawi journal article supplement (doi:10.1155/2018/1084795), 2018-01-01
Supplement: f1 [file 1084795.f1.xlsx]

## Sheet: Pre-questionnaire EXP
		QUESTIONS
		1	2	3	4	5	6	7	8	9	10	11	12	13	14	15	16	17	18	19	20	21	22	23	24	25	26	27	28	29	30		AVG
	EXP 1	4	2	1	2	2	2	3	2	2	4	2	1	1	5	5	2	3	5	3	4	4	1	4	5	2	2	1	1	1	1		2.56667		Question	Score	rank
	EXP 2	2	2	2	5	4	1	4	5	3	5	2	5	5	4	3	4	2	5	3	4	5	4	4	5	4	4	5	2	4	4		3.7		24	4.40909	1
	EXP 3	4	4	1	3	3	4	4	2	1	5	1	2	2	5	5	1	3	2	4	3	2	1	3	4	1	1	1	2	3	4		2.7		15	4.27273	2
	EXP 4	3	3	5	5	4	2	2	1	1	3	4	5	4	5	5	4	4	2	5	1	4	3	5	5	5	5	5	3	5	3		3.7		14	4	3
	EXP 5	5	3	5	4	4	2	5	5	2	3	4	4	4	5	5	2	2	4	4	4	1	1	4	5	4	2	3	3	4	5		3.6		19	4	4
	EXP 6	2	4	4	4	4	1	4	2	2	4	4	4	4	4	4	2	4	4	4	4	4	3	4	4	4	2	4	1	4	4		3.43333		23	3.95455	5
	EXP 7	2	3	2	3	4	4	4	1	1	5	1	4	3	4	4	5	3	4	3	5	3	4	4	5	4	4	3	3	2	2		3.3		21	3.90909	6
	EXP 8	2	4	2	4	4	2	2	2	4	2	2	4	5	2	4	2	2	1	4	2	3	2	4	3	4	3	2	4	2	2		2.83333		18	3.77273	7
	EXP 9	3	4	4	2	4	2	4	5	1	4	5	4	5	4	2	4	1	3	2	4	4	5	2	4	2	4	2	2	4	2		3.26667		10	3.68182	8
	EXP 10	4	4	5	4	4	4	3	2	2	4	2	3	3	5	5	3	3	3	4	4	4	2	4	5	3	2	2	2	4	4		3.43333		20	3.63636	9
	EXP 11	2	1	2	4	3	1	1	1	1	1	1	1	1	5	4	3	5	5	5	1	4	3	5	5	5	5	5	2	2	1		2.83333		4	3.59091	10
	EXP 12	4	2	2	3	3	3	4	2	2	3	1	2	2	4	4	2	2	4	5	2	4	4	5	5	2	2	2	3	4	3		3		7	3.5	11
	EXP 13	2	4	1	4	1	1	5	4	4	3	2	1	2	1	3	5	5	4	5	4	5	3	5	5	1	1	1	2	3	3		3		2	3.36364	12
	EXP 14	3	4	4	3	3	3	4	4	4	5	5	5	4	5	5	5	2	5	5	5	5	4	5	5	5	5	4	5	5	5		4.36667		5	3.36364	13
	EXP 15	3	3	2	4	5	2	2	4	3	3	2	2	1	4	4	3	4	4	4	4	5	2	2	3	2	1	1	1	3	4		2.9		16	3.22727	14
	EXP 16	4	3	4	4	2	5	3	2	1	4	1	2	4	5	5	4	2	5	4	5	5	2	4	5	4	5	3	1	5	4		3.56667		25	3.22727	15
	EXP 17	3	3	5	5	4	3	3	3	3	3	4	3	3	5	4	3	4	4	4	4	3	3	4	3	5	4	3	3	3	4		3.6		29	3.18182	16
	EXP 18	1	4	2	3	4	2	4	3	3	3	4	3	3	2	5	2	3	5	4	3	3	3	4	5	3	1	1	1	1	1		2.86667		17	3.13636	17
	EXP 19	3	5	4	3	5	5	5	1	1	5	1	2	2	5	5	5	5	5	5	5	5	3	3	2	5	5	5	4	5	5		3.96667		30	3.09091	18
	EXP 20	4	4	1	3	3	5	4	4	1	5	3	4	3	2	5	4	4	1	4	4	5	1	4	5	1	1	1	1	1	1		2.96667		3	3.04545	19
	EXP 21	1	4	4	4	2	1	4	4	2	4	1	1	1	3	3	3	3	4	2	4	4	3	4	4	2	4	2	2	2	2		2.8		26	3	20
	EXP 22	4	4	5	3	2	1	3	3	2	3	1	1	2	4	5	3	3	4	5	4	4	2	4	5	3	3	2	2	3	4		3.13333		1	2.95455	21
																																			13	2.90909	22
																																			12	2.86364	23
	AVG score [1, 5]	2.95455	3.36364	3.04545	3.59091	3.36364	2.54545	3.5	2.81818	2.09091	3.68182	2.40909	2.86364	2.90909	4	4.27273	3.22727	3.13636	3.77273	4	3.63636	3.90909	2.68182	3.95455	4.40909	3.22727	3	2.63636	2.27273	3.18182	3.09091		3.25152		8	2.81818	24
																																			22	2.68182	25
																																			27	2.63636	26
																																			6	2.54545	27
																																			11	2.40909	28
																																			28	2.27273	29
																																			9	2.09091	30

## Sheet: Pre-questionnaire NEX
		QUESTIONS
		1	2	3	4	5	6	7	8	9	10	11	12	13	14	15	16	17	18	19	20	21	22	23	24	25	26	27	29	29	30		AVG
	NEX 1	1	1	3	2	1	3	0	3	4	1	2	4	3	2	2	1	2	2	2	2	1	1	4	4	3	3	3	4	2	3		2.3		Question	Score	rank
	NEX 2	1	1	4	0	3	4	1	1	4	1	3	4	4	1	3	3	2	3	3	1	1	4	3	4	0	1	2	4	0	0		2.2		3	3.86364	1
	NEX 3	1	4	3	1	1	3	2	1	2	4	3	2	3	3	3	3	2	3	0	4	4	0	2	3	1	1	4	3	4	2		2.4		15	3.86364	2
	NEX 4	3	3	3	2	1	2	3	1	2	3	2	0	0	3	3	3	3	1	2	3	3	0	2	3	1	1	1	2	4	4		2.13333		1	3.81818	3
	NEX 5	3	0	3	2	0	1	2	1	3	2	0	4	2	0	3	3	1	1	0	3	0	4	1	3	1	2	2	3		0		1.72414		2	3.81818	4
	NEX 6	4	1	2	3	2	1	2	2	2	2	2	3	2	1	0	2	2	2	2	1	1	3	2	2	4	4	4	4	4	4		2.33333		29	3.80952	5
	NEX 7	3	2	2	2	3	2	1	4	2	3	2	2	4	2	3	1	3	2	2	3	3	3	2	3	2	2	2	3	3	3		2.46667		20	3.77273	6
	NEX 8	3	4	1	1	3	2	4	4	3	3	1	2	1	3	4	1	2	3	1	2	3	1	3	3	3	3	1	1	3	3		2.4		10	3.72727	7
	NEX 9	1	3	3	1	3	1	3	3	1	1	3	4	1	1	3	1	3	1	3	1	3	1	3	1	1	3	1	3	1	3		2.03333		12	3.72727	8
	NEX 10	3	4	3	2	4	4	3	4	4	4	4	2	1	4	4	4	2	3	4	2	2	4	4	4	2	2	2	3	3	2		3.1		17	3.63636	9
	NEX 11	3	2	2	1	2	3	2	2	3	1	2	2	3	3	2	3	3	2	2	3	3	2	2	3	2	2	2	2	2	2		2.26667		28	3.63636	10
	NEX 12	4	3	3	4	3	2	4	4	2	4	2	0	2	2	4	1	4	4	3	3	0	4	0	2	4	4	4	1	1	1		2.63333		11	3.59091	11
	NEX 13	4	3	3	4	1	1	2	1	1	4	2	2	2	2	3	4	3	4	4	4	4	4	2	1	4	4	4	1	4	4		2.86667		19	3.59091	12
	NEX 14	3	3	4	4	4	4	4	1	1	3	2	2	1	4	4	4	4	4	4	4	4	4	4	3	4	4	4	4	4	4		3.43333		22	3.59091	13
	NEX 15	3	3	3	3	3	2	3	3	1	3	2	2	2	4	2	2	2	3	3	3	3	4	3	1	3	3	1	3	2	2		2.56667		26	3.59091	14
	NEX 16	2	2	2	2	2	2	1	2	1	2	3	3	1	2	3	3	2	1	3	2	2	1	3	1	1	1	1	1	1	1		1.8		30	3.59091	15
	NEX 17	4	4	4	4	4	4	4	3	2	4	4	3	3	4	4	4	4	3	2	4	4	4	1	2	4	4	4	4	4	4		3.56667		18	3.54545	16
	NEX 18	4	4	2	3	2	1	2	2	2	3	3	4	1	2	3	3	4	4	3	4	3	2	2	1	4	4	4	2	3	3		2.8		24	3.54545	17
	NEX 19	2	4	3	3	3	1	1	2	2	1	4	3	1	1	1	2	1	0	3	2	0	3	4	2	1	2	2	2	2	2		2		7	3.5	18
	NEX 20	3	3	3	2	3	2	4	2	3	3	3	4	3	4	3	0	3	3	4	3	3	1	2	3	3	2	3	3	4	4		2.86667		27	3.5	19
	NEX 21	3	4	3	1	3	3	3	3	3	4	4	4	2	2	2	2	2	3	3	3	3	3	3	3	3	2	1	1	4	2		2.73333		5	3.45455	20
	NEX 22	4	4	4	4	3	2	4	4	4	4	4	4	4	4	4	4	4	4	4	4	4	4	2	4	3	3	3	4	4	4		3.73333		14	3.45455	21
																																			16	3.45455	22
	AVG score [0, 4]	2.81818	2.81818	2.86364	2.31818	2.45455	2.27273	2.5	2.40909	2.36364	2.72727	2.59091	2.72727	2.09091	2.45455	2.86364	2.45455	2.63636	2.54545	2.59091	2.77273	2.45455	2.59091	2.45455	2.54545	2.45455	2.59091	2.5	2.63636	2.80952	2.59091				21	3.45455	23
	AVG score [1, 5]	3.81818	3.81818	3.86364	3.31818	3.45455	3.27273	3.5	3.40909	3.36364	3.72727	3.59091	3.72727	3.09091	3.45455	3.86364	3.45455	3.63636	3.54545	3.59091	3.77273	3.45455	3.59091	3.45455	3.54545	3.45455	3.59091	3.5	3.63636	3.80952	3.59091		3.56335		23	3.45455	24
																																			25	3.45455	25
																																			8	3.40909	26
																																			9	3.36364	27
																																			4	3.31818	28
																																			6	3.27273	29
																																			13	3.09091	30

## Sheet: Main questionnaire questions
			validity scores
			CV(Q) by EXP	FV(Q) by NEX	AVG	diff		Content validity pre-questionnaire top 10 questions as answered by EXP	Face validity pre-questionnaire top 5 questions as answered by NEX	Main questionnaire questions			LOGICS of permutating question answers (pairs):									LRA = X SLOF = L SAOF = A SMOF = M
	1	You've noticed a post “Dangerous levels of chlorine detected in our hot water used for showering.” A greater impression on you would leave a post by your Facebook friend: _______ or _______.	2.95455	3.81818	3.38636	0.863636
	2	You've noticed a post “If every one of us recycled, we would halve CO2 emissions and receive state/country stimulus for it." You would recycle more frequently if it were posted by your Facebook friend: _______ or _______ .	3.36364	3.81818	3.59091	0.454545		24	24	24
	3	You've noticed a post "Disaster has struck, the Nepalese are left with no food, water and electricity. I've donated money, here are instructions for you to do the same." You would donate a greater amount if it were posted by your Facebook friend: _______ or _______	3.04545	3.86364	3.45455	0.818182		15	15	15			Q	Alg	Δ	Q	Alg	Δ
	4	You’re dissatisfied with your mobile operator. You've noticed a post "I've moved to my new telco X, I think they’re better." You would more likely change your mobile operator if it were posted by your Facebook friend: _______ or _______	3.59091	3.31818	3.45455	0.272727		14					Q1	L	123	Q5	M	123
	5	You've noticed a post “Gas station X has the best fuel.” You would more likely refuel more frequently at the mentioned gas station if it were posted by your Facebook friend: _______ or _______	3.36364	3.45455	3.40909	0.0909091		19	19	19				A	123		X	123
	6	You've noticed a post “Smoking while pregnant greatly increases chances of health issues in a child.” You would more likely spread this information if it were posted by your Facebook friend: _______ or _______	2.54545	3.27273	2.90909	0.727273		23						M	123		L	123
	7	You've noticed a post “Electricity bills will soon go up.” You would search for more details if it were posted by your Facebook friend: _______ or _______	3.5	3.5	3.5	0		21						X	123		A	123
	8	You've noticed a post “Video out showing New Zealand's prime minister slipping on a banana.” You would more likely watch the video if it were posted by your Facebook friend: _______ or _______	2.81818	3.40909	3.11364	0.590909		18					Q2	L	321	Q6	M	321
	9	You've noticed a post "Hidden camera caught them in adultery." You would watch the video to a greater length if it were posted by your Facebook friend: _______ or _______	2.09091	3.36364	2.72727	1.27273		10	10	10				A	321		X	321
	10	You've noticed a post “World leaders at their last meeting decided to increase nuclear armament.” You would search for more details if it were posted by your Facebook friend: _______ or _______	3.68182	3.72727	3.70455	0.0454545		20	20	20				M	321		L	321
	11	You've noticed a post “Toothpaste X discounted in all shopping malls.” You more likely go and buy the toothpaste if it were posted by your Facebook friend: _______ or _______	2.40909	3.59091	3	1.18182		4	(4)	(4)				X	321		A	321
	12	You've noticed a post “Travel agency X offers phenomenal discounts for Asia.” You would search for more details if it were posted by your Facebook friend: _______ or _______	2.86364	3.72727	3.29545	0.863636							Q3	X	321
	13	You've noticed a post “Concert tickets to see X selling out soon.” You would search for more details if it were posted by your Facebook friend: _______ or _______	2.90909	3.09091	3	0.181818								M	321
	14	You've noticed a post “I'm calling everyone to join a public protest against getting rid of future generation pensions.” You would more likely join this protest if it were posted by your Facebook friend: _______ or _______	4	3.45455	3.72727	0.545455								A	321
	15	You've noticed a post that explains the proven downside of your preferred political party. You would more likely change your vote if it were posted by your Facebook friend: _______ or _______	4.27273	3.86364	4.06818	0.409091								L	321
	16	You've noticed a post “People killed in a terrorist attack in Ireland.” You would search for more details if it were posted by your Facebook friend: _______ or _______	3.22727	3.45455	3.34091	0.227273							Q4	X	123
	17	You've noticed a post "Home visits by National TV bill collectors more frequent in the following month." You would less likely open your doors to strangers if it were posted by your Facebook friend: _______ or _______	3.13636	3.63636	3.38636	0.5								M	123
	18	You've noticed a post "Quickly pay your monthly bills, otherwise fines follow within 24 hours according to latest news." Reading the post would to a greater extent cause restlessness if it were posted by your Facebook friend: _______ or _______	3.77273	3.54545	3.65909	0.227273								A	123
	19	You've noticed a motivational post with thoughts about a brighter future, more jobs and possibilities, and greater salaries where you live. Reading the post would more likely cause peacefulness in you if it were posted by your Facebook friend: _______ or _______	4	3.59091	3.79545	0.409091								L	123
	20	You've noticed a post “Tensions between Balkan EU members might lead to war.” Reading the post would more likely cause restlessness if it were posted by your Facebook friend: _______ or _______	3.63636	3.77273	3.70455	0.136364
	21	You've noticed a post “Immigrants in EU constantly on the rise.” Reading the post would more likely spark an interest if it were posted by your Facebook friend: _______ or _______	3.90909	3.45455	3.68182	0.454545
	22	You've noticed a post “Parliament representatives physically confront each other at the morning sitting.” Reading the post would more likely surprise you if it were posted by your Facebook friend: _______ or _______	2.68182	3.59091	3.13636	0.909091
	23	You've noticed a motivational post about exercise, more physical activity and health benefits. Reading the post would more likely motivate you if it were posted by your Facebook friend: _______ or _______	3.95455	3.45455	3.70455	0.5
	24	You are planning on seeing the movie X. You've noticed a post “I've seen X, it's horrible.” Reading the post would more likely dissuade you from watching the film if it were posted by your Facebook friend: _______ or _______	4.40909	3.54545	3.97727	0.863636
	25	You are planning a trip to a neighboring country/state X, it's snowing outside. You've noticed a post "X's police officers fine drivers without winter tires." Reading the post would more likely persuade you to buy winter tires if it were posted by your Facebook friend: _______ or _______	3.22727	3.45455	3.34091	0.227273
	26	You are driving on X section of road . You've noticed a post “Police radar-tracking speed at section X." Reading the post would more likely cause you to obey the speed limit if it were posted by your Facebook friend: _______ or _______ "	3	3.59091	3.29545	0.590909
	27	You are driving on the road section X. You've noticed a post "Terrible traffic accident at section X." Reading the post would more likely disturb you if it were posted by your Facebook friend: _______ or _______ "	2.63636	3.5	3.06818	0.863636
	28	You are planning a trip to city X. You've noticed a post "City X caught in bad weather." Reading the post would more likely worry/disappoint you if it were posted by your Facebook friend: _______ or _______	2.27273	3.63636	2.95455	1.36364
	29	You are planning a trip to city X. You've noticed a post “City X has seen a rise in crime-rates in recent years.” Reading the post would more likely worry you if it were posted by your Facebook friend: _______ or _______	3.18	3.81	3.495	0.63
	30	You are planning a trip to city X. You've noticed a post “City X has seen a rise in crime-rates in recent years.” Reading the post would more likely persuade you to re-plan the trip if it were posted by your Facebook friend: _______ or _______	3.09091	3.59091	3.34091	0.5
						0.559342	<- AVG

## Sheet: measurement score distributions
	+D/100 or -D/100
	SLOF score	SAOF score	SMOF score	LRA score		BINZ:	BINZ:	BINZ:	BINZ:		Bin	Frequency															Bin	Frequency
	-0.9	-0.61	-0.52	-0.74		-0.95	-0.7	-0.6	-0.8		-0.95	0															-0.6	0
	-0.9	-0.61	-0.52	-0.74		-0.9	-0.65	-0.55	-0.75		-0.9	4															-0.55	4
	-0.9	-0.61	-0.52	-0.74		-0.85	-0.6	-0.5	-0.7		-0.85	10															-0.5	16
	-0.9	-0.61	-0.52	-0.74		-0.8	-0.55	-0.45	-0.65		-0.8	6															-0.45	0
	-0.86	-0.63	-0.55	-0.76		-0.75	-0.5	-0.4	-0.6		-0.75	0															-0.4	0
	-0.86	-0.6	-0.52	-0.74		-0.7	-0.45	-0.35	-0.55		-0.7	0															-0.35	0
	-0.86	-0.63	-0.55	-0.76		-0.65	-0.4	-0.3	-0.5		-0.65	0															-0.3	16
	-0.86	-0.6	-0.52	-0.74		-0.6	-0.35	-0.25	-0.45		-0.6	0															-0.25	29
	-0.86	-0.6	-0.52	-0.74		-0.55	-0.3	-0.2	-0.4		-0.55	0															-0.2	1
	-0.86	-0.63	-0.55	-0.76		-0.5	-0.25	-0.15	-0.35		-0.5	0															-0.15	30
	-0.86	-0.6	-0.52	-0.74		-0.45	-0.2	-0.1	-0.3		-0.45	27															-0.1	71
	-0.86	-0.63	-0.55	-0.76		-0.4	-0.15	-0.05	-0.25		-0.4	6															-0.05	99
	-0.86	-0.6	-0.52	-0.74		-0.35	-0.1	0	-0.2		-0.35	11															0	180
	-0.86	-0.6	-0.52	-0.74		-0.3	-0.05	0.05	-0.15		-0.3	0		Bin	Frequency												0.05	243
	-0.84	-0.62	-0.54	-0.74		-0.25	0	0.1	-0.1		-0.25	0		-0.7	0												0.1	177
	-0.84	-0.62	-0.54	-0.74		-0.2	0.05	0.15	-0.05		-0.2	6		-0.65	0												0.15	88		Bin	Frequency
	-0.84	-0.62	-0.54	-0.74		-0.15	0.1	0.2	0		-0.15	17		-0.6	20												0.2	43		-0.8	0
	-0.84	-0.62	-0.54	-0.74		-0.1	0.15	0.25	0.05		-0.1	26		-0.55	0												0.25	76		-0.75	4
	-0.84	-0.62	-0.54	-0.74		-0.05	0.2	0.3	0.1		-0.05	88		-0.5	0												0.3	49		-0.7	16
	-0.84	-0.62	-0.54	-0.74		0	0.25	0.35	0.15		0	283		-0.45	0												0.35	26		-0.65	0
	-0.49	-0.3	-0.24	-0.21		0.05	0.3	0.4	0.2		0.05	323		-0.4	0												0.4	0		-0.6	0
	-0.49	-0.31	-0.25	-0.23		0.1	0.35	0.45	0.25		0.1	140		-0.35	0												0.45	0		-0.55	0
	-0.49	-0.31	-0.25	-0.23		0.15	0.4	0.5	0.3		0.15	40		-0.3	41												0.5	0		-0.5	0
	-0.49	-0.31	-0.25	-0.23		0.2	0.45	0.55	0.35		0.2	19		-0.25	6												0.55	4		-0.45	0
	-0.49	-0.31	-0.25	-0.23		0.25	0.5	0.6	0.4		0.25	0		-0.2	0												0.6	0		-0.4	0
	-0.49	-0.31	-0.25	-0.23		0.3	0.55		0.45		0.3	0		-0.15	23												More	0		-0.35	0
	-0.49	-0.31	-0.25	-0.23		0.35	0.6		0.5		0.35	0		-0.1	86															-0.3	0
	-0.49	-0.31	-0.25	-0.23		0.4	0.65		0.55		0.4	7		-0.05	121															-0.25	13
	-0.49	-0.31	-0.25	-0.23		0.45	0.7		0.6		0.45	18		0	149															-0.2	52
	-0.49	-0.31	-0.25	-0.23		0.5	0.75		0.65		0.5	117		0.05	171															-0.15	21
	-0.49	-0.31	-0.25	-0.23		0.55			0.7		0.55	0		0.1	281															-0.1	52
	-0.49	-0.31	-0.25	-0.23		0.6			0.75		0.6	0		0.15	62															-0.05	97
	-0.49	-0.31	-0.25	-0.23		0.65			0.8		0.65	0		0.2	19															0	164
	-0.49	-0.31	-0.25	-0.23		0.7					0.7	0		0.25	18															0.05	339
	-0.49	-0.31	-0.25	-0.23		0.75					0.75	0		0.3	23															0.1	132
	-0.49	-0.31	-0.25	-0.23		0.8					0.8	0		0.35	128															0.15	35
	-0.49	-0.31	-0.25	-0.23		0.85					0.85	0		0.4	0															0.2	24
	-0.49	-0.31	-0.25	-0.23		0.9					0.9	4		0.45	0															0.25	194
	-0.49	-0.31	-0.25	-0.23		0.95					0.95	0		0.5	0															0.3	5
	-0.49	-0.31	-0.25	-0.23							More	0		0.55	0															0.35	0
	-0.48	-0.31	-0.25	-0.25										0.6	0															0.4	0
	-0.48	-0.31	-0.25	-0.25										0.65	4															0.45	0
	-0.48	-0.31	-0.25	-0.25										0.7	0															0.5	0
	-0.48	-0.31	-0.25	-0.25										0.75	0															0.55	0
	-0.48	-0.31	-0.25	-0.25										More	0															0.6	0
	-0.48	-0.31	-0.25	-0.25																										0.65	0
	-0.46	-0.27	-0.2	-0.13																										0.7	0
	-0.43	-0.14	0.01	0.06																										0.75	2
	-0.43	-0.14	0.01	0.06																										0.8	2
	-0.43	-0.14	0.01	0.06																										More	0
	-0.43	-0.14	0.01	0.06
	-0.43	-0.14	0.01	0.06
	-0.43	-0.14	0.01	0.06
	-0.37	-0.12	-0.08	-0.06
	-0.37	-0.12	-0.08	-0.06
	-0.37	-0.12	-0.08	-0.06
	-0.37	-0.12	-0.08	-0.06
	-0.37	-0.12	-0.08	-0.06
	-0.37	-0.12	-0.08	-0.06
	-0.36	-0.17	-0.16	-0.26
	-0.36	-0.17	-0.16	-0.26
	-0.36	-0.17	-0.16	-0.26
	-0.36	-0.17	-0.16	-0.26
	-0.36	-0.17	-0.16	-0.26
	-0.25	-0.11	-0.12	-0.07
	-0.25	-0.11	-0.12	-0.07
	-0.25	-0.11	-0.12	-0.07
	-0.25	-0.11	-0.12	-0.07
	-0.25	-0.11	-0.12	-0.07
	-0.25	-0.11	-0.12	-0.07
	-0.17	-0.03	0.02	0.16
	-0.17	-0.03	0.02	0.16
	-0.17	-0.03	0.02	0.16
	-0.17	-0.03	0.02	0.16
	-0.17	-0.03	0.02	0.16
	-0.17	-0.03	0.02	0.16
	-0.16	-0.05	0	0.07
	-0.16	-0.05	0	0.07
	-0.16	-0.05	0	0.07
	-0.16	-0.05	0	0.07
	-0.16	-0.05	0	0.07
	-0.16	-0.05	0	0.07
	-0.16	-0.05	0	0.07
	-0.16	-0.05	0	0.07
	-0.16	-0.05	0	0.07
	-0.16	-0.05	0	0.07
	-0.16	-0.05	0	0.07
	-0.12	-0.34	-0.33	-0.24
	-0.12	-0.34	-0.33	-0.24
	-0.12	-0.34	-0.33	-0.24
	-0.12	-0.34	-0.33	-0.24
	-0.12	-0.34	-0.33	-0.24
	-0.12	-0.34	-0.33	-0.24
	-0.12	-0.34	-0.33	-0.24
	-0.12	-0.34	-0.33	-0.24
	-0.12	-0.34	-0.33	-0.24
	-0.12	-0.33	-0.31	-0.14
	-0.12	-0.33	-0.31	-0.14
	-0.12	-0.34	-0.33	-0.24
	-0.12	-0.33	-0.31	-0.14
	-0.12	-0.34	-0.33	-0.24
	-0.12	-0.34	-0.33	-0.24
	-0.12	-0.33	-0.31	-0.14
	-0.12	0.07	0.08	0.05
	-0.12	0.07	0.08	0.05
	-0.12	0.07	0.08	0.05
	-0.12	0.07	0.08	0.05
	-0.12	0.07	0.08	0.05
	-0.12	0.07	0.08	0.05
	-0.11	-0.3	-0.29	-0.21
	-0.11	-0.3	-0.29	-0.21
	-0.11	-0.3	-0.29	-0.21
	-0.11	-0.3	-0.29	-0.21
	-0.09	0.04	0.05	0.04
	-0.09	0.04	0.05	0.04
	-0.09	0.04	0.05	0.04
	-0.09	0.04	0.05	0.04
	-0.09	0.04	0.05	0.04
	-0.09	0.04	0.05	0.04
	-0.08	-0.11	-0.09	-0.07
	-0.08	-0.14	-0.11	-0.02
	-0.08	-0.11	-0.09	-0.07
	-0.08	-0.14	-0.11	-0.02
	-0.08	-0.11	-0.09	-0.07
	-0.08	-0.11	-0.09	-0.07
	-0.08	-0.11	-0.09	-0.07
	-0.08	-0.11	-0.09	-0.07
	-0.08	-0.1	-0.09	-0.08
	-0.08	-0.1	-0.09	-0.08
	-0.08	-0.1	-0.09	-0.08
	-0.07	-0.1	-0.09	-0.09
	-0.07	-0.1	-0.09	-0.09
	-0.07	-0.1	-0.09	-0.09
	-0.07	-0.1	-0.09	-0.09
	-0.07	-0.1	-0.09	-0.09
	-0.07	-0.16	-0.12	-0.04
	-0.07	-0.16	-0.12	-0.04
	-0.07	-0.16	-0.12	-0.04
	-0.07	-0.16	-0.12	-0.04
	-0.07	-0.16	-0.12	-0.04
	-0.07	-0.16	-0.12	-0.04
	-0.07	-0.05	-0.01	-0.05
	-0.07	-0.12	-0.12	-0.11
	-0.07	-0.12	-0.12	-0.11
	-0.07	-0.12	-0.12	-0.11
	-0.07	-0.12	-0.12	-0.11
	-0.07	-0.12	-0.12	-0.11
	-0.07	-0.12	-0.12	-0.11
	-0.06	-0.17	-0.16	-0.13
	-0.06	-0.03	0.01	0.15
	-0.06	-0.04	-0.03	-0.04
	-0.06	-0.03	0.01	0.15
	-0.06	-0.17	-0.16	-0.13
	-0.06	-0.04	-0.03	-0.04
	-0.06	-0.04	-0.03	-0.04
	-0.06	-0.03	0.01	0.15
	-0.06	-0.17	-0.16	-0.13
	-0.06	-0.04	-0.03	-0.04
	-0.06	-0.17	-0.16	-0.13
	-0.06	-0.03	0.01	0.15
	-0.06	-0.04	-0.03	-0.04
	-0.06	-0.17	-0.16	-0.13
	-0.06	-0.03	0.01	0.15
	-0.06	-0.04	-0.03	-0.04
	-0.06	-0.03	0.01	0.15
	-0.06	-0.17	-0.16	-0.13
	-0.06	-0.03	0.01	0.15
	-0.06	-0.07	-0.05	0.01
	-0.06	-0.07	-0.05	0.01
	-0.06	-0.03	0.01	0.15
	-0.06	-0.03	0.01	0.15
	-0.06	-0.04	-0.03	-0.04
	-0.06	-0.04	-0.03	-0.04
	-0.06	-0.04	-0.03	-0.04
	-0.06	-0.04	-0.03	-0.04
	-0.06	-0.04	-0.03	-0.04
	-0.06	-0.07	-0.07	-0.06
	-0.06	-0.07	-0.07	-0.06
	-0.06	-0.07	-0.07	-0.06
	-0.06	-0.06	-0.03	-0.02
	-0.06	-0.06	-0.03	-0.02
	-0.06	-0.06	-0.03	-0.02
	-0.06	-0.07	-0.05	0.01
	-0.06	-0.06	-0.03	-0.02
	-0.06	-0.18	-0.15	0.04
	-0.06	-0.18	-0.15	0.04
	-0.06	-0.18	-0.15	0.04
	-0.06	-0.18	-0.15	0.04
	-0.06	-0.18	-0.15	0.04
	-0.06	-0.18	-0.15	0.04
	-0.06	-0.07	-0.05	0.01
	-0.06	-0.07	-0.05	0.01
	-0.06	-0.07	-0.05	0.01
	-0.06	-0.07	-0.05	0.01
	-0.06	-0.07	-0.05	0.01
	-0.06	-0.07	-0.05	0.01
	-0.06	-0.06	-0.03	-0.02
	-0.06	-0.01	0	-0.03
	-0.06	0.01	0.02	0
	-0.06	0.01	0.02	0
	-0.06	-0.01	0	-0.03
	-0.05	-0.13	-0.1	-0.06
	-0.05	-0.13	-0.1	-0.06
	-0.05	-0.13	-0.1	-0.06
	-0.05	-0.13	-0.1	-0.06
	-0.05	-0.13	-0.1	-0.06
	-0.05	-0.13	-0.1	-0.06
	-0.05	-0.12	-0.12	-0.07
	-0.05	-0.12	-0.12	-0.07
	-0.05	-0.12	-0.12	-0.07
	-0.05	-0.12	-0.12	-0.07
	-0.05	-0.12	-0.12	-0.09
	-0.05	0.01	0.08	0.13
	-0.05	-0.13	-0.1	-0.06
	-0.05	-0.13	-0.1	-0.06
	-0.05	-0.13	-0.1	-0.06
	-0.05	-0.13	-0.1	-0.06
	-0.05	-0.13	-0.1	-0.06
	-0.05	-0.12	-0.12	-0.09
	-0.05	-0.12	-0.12	-0.09
	-0.04	-0.02	-0.01	-0.01
	-0.04	-0.02	-0.01	-0.01
	-0.04	-0.02	-0.01	-0.01
	-0.04	-0.02	-0.01	-0.01
	-0.04	-0.02	-0.01	-0.01
	-0.04	-0.02	-0.01	-0.01
	-0.04	-0.12	-0.12	-0.11
	-0.04	-0.12	-0.12	-0.11
	-0.04	-0.12	-0.12	-0.11
	-0.04	-0.12	-0.12	-0.11
	-0.04	-0.12	-0.12	-0.11
	-0.04	-0.12	-0.12	-0.11
	-0.04	0.02	0.04	0
	-0.04	0.02	0.04	0
	-0.04	0.02	0.04	0
	-0.04	0.02	0.04	0
	-0.04	0.02	0.04	0
	-0.04	0.02	0.04	0
	-0.04	0.02	0.03	0.02
	-0.04	0.02	0.03	0.02
	-0.04	0.02	0.03	0.02
	-0.04	0.02	0.03	0.02
	-0.04	0.02	0.03	0.02
	-0.04	-0.07	-0.04	-0.04
	-0.04	-0.07	-0.04	-0.04
	-0.04	-0.07	-0.04	-0.04
	-0.04	-0.07	-0.04	-0.04
	-0.03	-0.03	-0.03	-0.05
	-0.03	-0.08	-0.11	-0.24
	-0.03	-0.07	-0.07	-0.05
	-0.03	-0.08	-0.11	-0.24
	-0.03	-0.08	-0.11	-0.24
	-0.03	-0.07	-0.07	-0.05
	-0.03	-0.08	-0.11	-0.24
	-0.03	-0.08	-0.11	-0.24
	-0.03	-0.07	-0.07	-0.05
	-0.03	-0.08	-0.11	-0.24
	-0.03	-0.08	-0.11	-0.24
	-0.03	-0.07	-0.07	-0.05
	-0.03	-0.08	-0.11	-0.24
	-0.03	-0.07	-0.07	-0.05
	-0.03	-0.08	-0.11	-0.24
	-0.03	-0.08	-0.11	-0.24
	-0.03	-0.07	-0.07	-0.05
	-0.03	-0.08	-0.11	-0.24
	-0.03	-0.08	-0.11	-0.24
	-0.03	-0.05	-0.03	-0.04
	-0.03	-0.05	-0.03	-0.04
	-0.03	0.06	0.1	0.07
	-0.03	0.06	0.1	0.07
	-0.03	0.06	0.1	0.07
	-0.03	0.06	0.1	0.07
	-0.03	0.06	0.1	0.07
	-0.03	0.06	0.1	0.07
	-0.03	-0.13	-0.16	-0.12
	-0.03	-0.13	-0.16	-0.12
	-0.03	-0.13	-0.16	-0.12
	-0.03	-0.13	-0.16	-0.12
	-0.03	-0.13	-0.16	-0.12
	-0.03	-0.13	-0.16	-0.12
	-0.03	-0.13	-0.16	-0.12
	-0.03	-0.13	-0.16	-0.12
	-0.03	-0.13	-0.16	-0.12
	-0.03	-0.13	-0.16	-0.12
	-0.03	-0.13	-0.16	-0.12
	-0.03	-0.13	-0.16	-0.12
	-0.02	-0.11	-0.19	-0.15
	-0.02	-0.11	-0.19	-0.15
	-0.02	-0.11	-0.19	-0.15
	-0.02	-0.11	-0.19	-0.15
	-0.02	-0.11	-0.19	-0.15
	-0.02	-0.11	-0.19	-0.15
	-0.02	-0.06	-0.07	-0.04
	-0.02	-0.06	-0.07	-0.04
	-0.02	-0.06	-0.07	-0.04
	-0.02	-0.06	-0.07	-0.04
	-0.02	-0.06	-0.07	-0.04
	-0.02	-0.06	-0.07	-0.04
	-0.02	-0.06	-0.07	-0.04
	-0.02	-0.06	-0.07	-0.04
	-0.02	-0.06	-0.07	-0.04
	-0.02	-0.06	-0.07	-0.04
	-0.02	-0.06	-0.07	-0.04
	-0.02	-0.07	-0.03	0.03
	-0.02	-0.07	-0.03	0.03
	-0.02	-0.07	-0.03	0.03
	-0.02	-0.07	-0.03	0.03
	-0.02	-0.07	-0.03	0.03
	-0.02	-0.07	-0.03	0.03
	-0.02	-0.08	-0.07	-0.02
	-0.02	-0.08	-0.07	-0.02
	-0.02	-0.08	-0.07	-0.02
	-0.02	-0.08	-0.07	-0.02
	-0.02	-0.08	-0.07	-0.02
	-0.02	-0.08	-0.07	-0.02
	-0.02	-0.03	-0.04	-0.11
	-0.02	-0.03	-0.04	-0.11
	-0.02	-0.03	-0.04	-0.11
	-0.02	-0.03	-0.04	-0.11
	-0.02	-0.03	-0.04	-0.11
	-0.02	-0.03	-0.04	-0.11
	-0.02	0.06	0.1	0.07
	-0.02	0.06	0.1	0.07
	-0.02	0.06	0.1	0.07
	-0.02	0.06	0.1	0.07
	-0.02	0.06	0.1	0.07
	-0.02	0.06	0.1	0.07
	-0.02	-0.08	-0.07	-0.02
	-0.02	-0.08	-0.07	-0.02
	-0.02	-0.08	-0.07	-0.02
	-0.02	-0.08	-0.07	-0.02
	-0.02	-0.08	-0.07	-0.02
	-0.02	-0.08	-0.07	-0.02
	-0.02	-0.04	-0.05	-0.12
	-0.02	-0.08	-0.11	-0.26
	-0.02	-0.04	-0.05	-0.12
	-0.02	-0.08	-0.07	-0.02
	-0.02	-0.08	-0.07	-0.02
	-0.02	-0.04	-0.05	-0.12
	-0.02	-0.08	-0.07	-0.02
	-0.02	-0.04	-0.05	-0.12
	-0.02	-0.08	-0.07	-0.02
	-0.02	-0.04	-0.05	-0.12
	-0.02	-0.08	-0.07	-0.02
	-0.02	-0.08	-0.11	-0.26
	-0.02	-0.04	-0.05	-0.12
	-0.02	0	0	-0.03
	-0.02	0.06	0.07	0.03
	-0.02	0.06	0.07	0.03
	-0.02	0	0	-0.03
	-0.02	0.06	0.07	0.03
	-0.02	0.06	0.07	0.03
	-0.02	0.06	0.07	0.03
	-0.02	0.06	0.07	0.03
	-0.02	0.06	0.07	0.03
	-0.02	0	0	-0.03
	-0.02	0.06	0.07	0.03
	-0.02	0.06	0.07	0.03
	-0.02	0	0	-0.03
	-0.02	0.06	0.07	0.03
	-0.02	-0.02	0.03	0.02
	-0.02	0	0	-0.03
	-0.02	0	0	-0.03
	-0.02	-0.02	0.03	0.02
	-0.01	-0.07	-0.05	0.06
	-0.01	-0.07	-0.1	-0.24
	-0.01	-0.07	-0.05	0.06
	-0.01	-0.07	-0.1	-0.24
	-0.01	0.07	0.07	0.04
	-0.01	-0.07	-0.05	0.06
	-0.01	0.07	0.07	0.04
	-0.01	-0.07	-0.05	0.06
	-0.01	-0.07	-0.1	-0.24
	-0.01	0.07	0.07	0.04
	-0.01	-0.07	-0.05	0.06
	-0.01	0.07	0.07	0.04
	-0.01	-0.07	-0.1	-0.24
	-0.01	-0.07	-0.05	0.06
	-0.01	0	0.02	-0.04
	-0.01	-0.06	-0.1	0.03
	-0.01	-0.06	-0.1	0.03
	-0.01	-0.06	-0.1	0.03
	-0.01	-0.06	-0.1	0.03
	-0.01	-0.06	-0.1	0.03
	-0.01	-0.06	-0.1	0.03
	-0.01	-0.02	-0.02	0.01
	-0.01	-0.12	-0.12	-0.06
	-0.01	-0.02	-0.02	0.01
	-0.01	-0.12	-0.12	-0.06
	-0.01	-0.12	-0.12	-0.06
	-0.01	-0.02	-0.02	0.01
	-0.01	-0.12	-0.12	-0.06
	-0.01	-0.02	-0.02	0.01
	-0.01	-0.02	-0.02	0.01
	-0.01	-0.12	-0.12	-0.06
	-0.01	-0.02	-0.02	0.01
	-0.01	-0.12	-0.12	-0.06
	-0.01	0.02	0.03	0.02
	-0.01	0.02	0.03	0.02
	-0.01	0.02	0.03	0.02
	-0.01	0.02	0.03	0.02
	-0.01	0.02	0.03	0.02
	-0.01	0.06	0.16	0.23
	-0.01	0.06	0.16	0.23
	-0.01	0.06	0.16	0.23
	-0.01	0.06	0.16	0.23
	-0.01	0.06	0.16	0.23
	-0.01	0.06	0.16	0.23
	-0.01	0.02	0.03	0.02
	-0.01	0.02	0.03	0.02
	-0.01	0.02	0.03	0.02
	-0.01	0.02	0.03	0.02
	0	0.02	0.03	0.02
	0	0.02	0.03	0.02
	0	0.02	0.03	0.02
	0	0.02	0.03	0.02
	0	0.02	0.03	0.02
	0	0.02	0.03	0.02
	0	0.03	0.02	-0.05
	0	0	0	-0.03
	0	0.03	0.02	-0.05
	0	0	0	-0.03
	0	0	0	0.03
	0	0.03	0.02	-0.05
	0	0	0	-0.03
	0	0.03	0.02	-0.05
	0	0	0	0.03
	0	0.03	0.02	-0.05
	0	0	0	-0.03
	0	0.03	0.02	-0.05
	0	-0.02	0	0.02
	0	-0.01	-0.02	-0.05
	0	-0.02	0	0.02
	0	-0.01	-0.02	-0.05
	0	-0.01	-0.02	-0.05
	0	-0.02	0	0.02
	0	-0.01	-0.02	-0.05
	0	-0.02	0	0.02
	0	-0.01	-0.02	-0.05
	0	-0.02	0	0.02
	0	-0.01	-0.02	-0.05
	0	-0.02	0	0.02
	0	-0.03	-0.02	0.05
	0	0.03	0.02	-0.05
	0	0.03	0.02	-0.05
	0	0.03	0.02	-0.05
	0	0.03	0.02	-0.05
	0	0.03	0.02	-0.05
	0	0.06	0.07	0.05
	0	0.06	0.07	0.05
	0	0.06	0.07	0.05
	0	0.06	0.07	0.05
	0	0.06	0.07	0.05
	0	0.06	0.07	0.05
	0	-0.02	0	0.17
	0	-0.02	0	0.17
	0	-0.02	0	0.17
	0	-0.02	0	0.17
	0	-0.02	0	0.17
	0	-0.02	0	0.17
	0	-0.03	-0.02	0.05
	0	-0.03	-0.02	0.05
	0	-0.03	-0.02	0.05
	0	-0.03	-0.02	0.05
	0	-0.03	-0.02	0.05
	0	-0.03	-0.02	0.05
	0	0.01	0.02	-0.03
	0	0.01	0.02	-0.03
	0	0.01	0.02	-0.03
	0	0.01	0.02	-0.03
	0	0.01	0.02	-0.03
	0	0.01	0.02	-0.03
	0	0.01	0.02	-0.03
	0	0.01	0.02	-0.03
	0	0.01	0.02	-0.03
	0	0.01	0.02	-0.03
	0	0.01	0.02	-0.03
	0	0.01	0.02	-0.03
	0	0.06	0.07	0.05
	0	0.06	0.07	0.05
	0	0.06	0.07	0.05
	0	0.06	0.07	0.05
	0	0.06	0.07	0.05
	0	0.06	0.07	0.05
	0.01	-0.07	-0.07	-0.04
	0.01	-0.07	-0.07	-0.04
	0.01	0.07	0.1	0.24
	0.01	0.07	0.1	0.24
	0.01	0.02	0.02	0.03
	0.01	0.07	0.07	0.04
	0.01	0.02	0.02	0.03
	0.01	0.07	0.07	0.04
	0.01	0.07	0.07	0.04
	0.01	0.02	0.02	0.03
	0.01	0.07	0.07	0.04
	0.01	0.02	0.02	0.03
	0.01	0.07	0.07	0.04
	0.01	0.02	0.02	0.03
	0.01	0.07	0.07	0.04
	0.01	0.02	0.02	0.03
	0.01	0	-0.02	0.04
	0.01	0	-0.02	0.04
	0.01	0	-0.02	0.04
	0.01	0	-0.02	0.04
	0.01	0	-0.02	0.04
	0.01	0.07	0.07	0
	0.01	0.07	0.07	0
	0.01	0.07	0.07	0
	0.01	0.07	0.07	0
	0.01	0.07	0.07	0
	0.01	0.07	0.07	0
	0.01	0.08	0.13	0.02
	0.01	0.08	0.13	0.02
	0.01	0.08	0.13	0.02
	0.01	0.08	0.13	0.02
	0.01	0.08	0.13	0.02
	0.01	0.08	0.13	0.02
	0.01	-0.02	-0.03	-0.02
	0.01	0.07	0.1	0.24
	0.01	-0.07	-0.07	-0.04
	0.01	-0.07	-0.07	-0.04
	0.01	0.07	0.1	0.24
	0.01	-0.07	-0.07	-0.04
	0.01	0.07	0.1	0.24
	0.01	0.07	0.1	0.24
	0.01	-0.07	-0.07	-0.04
	0.01	0.07	0.1	0.24
	0.01	-0.07	-0.07	-0.04
	0.01	-0.07	-0.07	-0.04
	0.01	0.07	0.1	0.24
	0.01	-0.12	-0.12	-0.09
	0.01	-0.12	-0.12	-0.09
	0.01	-0.12	-0.12	-0.09
	0.01	-0.12	-0.12	-0.09
	0.01	-0.12	-0.12	-0.09
	0.01	-0.12	-0.12	-0.09
	0.01	0.03	0.04	0.1
	0.01	0.07	0.1	0.24
	0.01	0.03	0.04	0.1
	0.01	0.07	0.1	0.24
	0.01	0.07	0.1	0.24
	0.01	0.03	0.04	0.1
	0.01	0.07	0.1	0.24
	0.01	0.03	0.04	0.1
	0.01	0.07	0.1	0.24
	0.01	0.03	0.04	0.1
	0.01	0.07	0.1	0.24
	0.01	0.03	0.04	0.1
	0.01	0.02	0.03	0.04
	0.01	0.02	0.03	0.04
	0.01	0.02	0.03	0.04
	0.01	0.02	0.03	0.04
	0.01	0.02	0.03	0.04
	0.01	0.02	0.03	0.04
	0.01	0.02	0.03	0.04
	0.01	0.02	0.03	0.04
	0.01	0.02	0.03	0.04
	0.01	0.02	0.03	0.04
	0.01	0.02	0.03	0.04
	0.01	0.02	0.03	0.04
	0.01	-0.02	-0.03	-0.02
	0.01	-0.02	-0.03	-0.02
	0.02	0.01	0	-0.04
	0.02	0.06	0.07	0.04
	0.02	0.01	0	-0.04
	0.02	0.01	0	-0.04
	0.02	0.01	0	-0.04
	0.02	0.01	0	-0.04
	0.02	0.01	0	-0.04
	0.02	0.02	0.04	0.04
	0.02	0.02	0.04	0.04
	0.02	0.02	0.04	0.04
	0.02	0.02	0.04	0.04
	0.02	0.02	0.04	0.04
	0.02	0.02	0.04	0.04
	0.02	0.05	0.03	-0.15
	0.02	0.05	0.03	-0.15
	0.02	0.05	0.03	-0.15
	0.02	0.05	0.03	-0.15
	0.02	0.05	0.03	-0.15
	0.02	0.05	0.03	-0.15
	0.02	0.08	0.07	0.02
	0.02	0.08	0.11	0.26
	0.02	0.08	0.11	0.26
	0.02	0.08	0.11	0.26
	0.02	0.08	0.11	0.26
	0.02	0	0	0.03
	0.02	0.08	0.18	0.25
	0.02	0	0	0.03
	0.02	0.08	0.18	0.25
	0.02	0.08	0.18	0.25
	0.02	0	0	0.03
	0.02	0.08	0.18	0.25
	0.02	0	0	0.03
	0.02	0.08	0.18	0.25
	0.02	0	0	0.03
	0.02	0.08	0.18	0.25
	0.02	0	0	0.03
	0.02	-0.06	-0.07	-0.03
	0.02	-0.06	-0.07	-0.03
	0.02	0	0	0.03
	0.02	0	0	0.03
	0.02	0.02	-0.03	-0.02
	0.02	0	0	0.03
	0.02	0	0	0.03
	0.02	0.02	-0.03	-0.02
	0.02	0	0	0.03
	0.02	0.02	-0.03	-0.02
	0.02	0	0	0.03
	0.02	0.02	-0.03	-0.02
	0.03	0.05	0.03	0.04
	0.03	0.05	0.03	0.04
	0.03	0.05	0.03	0.04
	0.03	0.05	0.03	0.04
	0.03	0.05	0.03	0.04
	0.03	0.05	0.03	0.04
	0.03	-0.08	-0.11	-0.05
	0.03	-0.08	-0.11	-0.05
	0.03	-0.08	-0.11	-0.05
	0.03	-0.08	-0.11	-0.05
	0.03	-0.08	-0.11	-0.05
	0.03	-0.08	-0.11	-0.05
	0.03	0.08	0.11	0.24
	0.03	0.08	0.11	0.24
	0.03	0.08	0.11	0.24
	0.03	0.08	0.11	0.24
	0.03	0.08	0.11	0.24
	0.03	0.08	0.11	0.24
	0.03	0.07	0.07	0.05
	0.03	0.08	0.11	0.24
	0.03	0.07	0.07	0.05
	0.03	0.08	0.11	0.24
	0.03	0.08	0.11	0.24
	0.03	0.07	0.07	0.05
	0.03	0.08	0.11	0.24
	0.03	0.07	0.07	0.05
	0.03	0.07	0.07	0.05
	0.03	0.08	0.11	0.24
	0.03	0.07	0.07	0.05
	0.03	0.08	0.11	0.24
	0.03	0.05	0.03	0.04
	0.03	0.05	0.03	0.04
	0.03	0.05	0.03	0.04
	0.03	0.05	0.03	0.04
	0.03	0.05	0.03	0.04
	0.03	0.05	0.03	0.04
	0.03	0.05	0.03	0.04
	0.03	0.05	0.03	0.04
	0.03	0.05	0.03	0.04
	0.03	0.05	0.03	0.04
	0.03	0.05	0.03	0.04
	0.03	0.05	0.03	0.04
	0.03	0.12	0.14	0.02
	0.03	0.12	0.14	0.02
	0.03	0.12	0.14	0.02
	0.03	0.12	0.14	0.02
	0.03	0.12	0.14	0.02
	0.03	0.12	0.14	0.02
	0.03	0.05	0.03	0.04
	0.03	0.03	0.04	0.08
	0.03	0.05	0.03	0.04
	0.03	0.07	0.1	0.22
	0.03	0.05	0.03	0.04
	0.03	0.03	0.04	0.08
	0.03	0.05	0.03	0.04
	0.03	0.07	0.1	0.22
	0.03	0.07	0.1	0.22
	0.03	0.05	0.03	0.04
	0.03	0.03	0.04	0.08
	0.03	0.05	0.03	0.04
	0.03	0.07	0.1	0.22
	0.03	0.05	0.03	0.04
	0.03	0.03	0.04	0.08
	0.03	0.05	0.03	0.04
	0.03	0.05	0.03	0.04
	0.03	0.07	0.1	0.22
	0.03	0.05	0.03	0.04
	0.03	0.03	0.04	0.08
	0.03	0.05	0.03	0.04
	0.03	0.07	0.1	0.22
	0.03	0.05	0.03	0.04
	0.03	0.03	0.04	0.08
	0.03	-0.02	-0.03	0.01
	0.03	-0.02	-0.03	0.01
	0.03	-0.02	-0.03	0.01
	0.03	-0.02	-0.03	0.01
	0.03	-0.02	-0.03	0.01
	0.03	-0.02	-0.03	0.01
	0.03	0.03	0.03	0.05
	0.03	0.03	0.03	0.05
	0.03	0.03	0.03	0.05
	0.03	0.03	0.03	0.05
	0.03	0.03	0.03	0.05
	0.03	0.03	0.03	0.05
	0.03	0.03	0.03	0.05
	0.03	0.03	0.03	0.05
	0.03	0.03	0.03	0.05
	0.03	0.03	0.03	0.05
	0.03	0.03	0.03	0.05
	0.03	0.05	0.03	0.04
	0.03	0.05	0.03	0.04
	0.03	0.05	0.03	0.04
	0.03	0.05	0.03	0.04
	0.03	0.05	0.03	0.04
	0.03	0.05	0.03	0.04
	0.03	0.05	0.03	0.04
	0.03	0.05	0.03	0.04
	0.03	0.05	0.03	0.04
	0.03	0.05	0.03	0.04
	0.03	0.05	0.03	0.04
	0.03	0.05	0.03	0.04
	0.03	0.05	0.03	0.04
	0.03	0.05	0.03	0.04
	0.03	0.05	0.03	0.04
	0.03	0.05	0.03	0.04
	0.03	0.05	0.03	0.04
	0.03	0.05	0.03	0.04
	0.03	0.05	0.03	0.04
	0.03	0.05	0.03	0.04
	0.03	0.05	0.03	0.04
	0.03	0.05	0.03	0.04
	0.03	0.02	0.02	0.02
	0.03	0.02	0.02	0.02
	0.03	0.02	0.02	0.02
	0.03	0.02	0.02	0.02
	0.03	0.02	0.02	0.02
	0.03	0.02	0.02	0.02
	0.03	-0.06	-0.1	-0.07
	0.03	-0.06	-0.1	-0.07
	0.03	-0.06	-0.1	-0.07
	0.03	-0.06	-0.1	-0.07
	0.03	-0.06	-0.1	-0.07
	0.03	-0.06	-0.1	-0.07
	0.03	0.02	0.02	0.02
	0.03	0.04	0.04	0.06
	0.03	0.02	0.02	0.02
	0.03	0.04	0.04	0.06
	0.03	0.04	0.04	0.06
	0.03	0.02	0.02	0.02
	0.03	0.04	0.04	0.06
	0.03	0.02	0.02	0.02
	0.03	0.04	0.04	0.06
	0.03	0.02	0.02	0.02
	0.03	0.04	0.04	0.06
	0.03	0.02	0.02	0.02
	0.04	0.04	0.02	0.02
	0.04	0.04	0.02	0.02
	0.04	0.04	0.02	0.02
	0.04	0.04	0.02	0.02
	0.04	0.04	0.02	0.02
	0.04	0.04	0.02	0.02
	0.04	0.04	0.05	0.06
	0.04	0.04	0.05	0.06
	0.04	0.04	0.05	0.06
	0.04	0.04	0.05	0.06
	0.04	0.04	0.05	0.06
	0.04	0.04	0.05	0.06
	0.04	-0.02	-0.03	-0.02
	0.04	0.07	0.04	0.04
	0.04	0.07	0.04	0.04
	0.05	0.15	0.15	0.03
	0.05	0.15	0.15	0.03
	0.05	0.15	0.15	0.03
	0.05	0.15	0.15	0.03
	0.05	0.15	0.15	0.03
	0.05	0.15	0.15	0.03
	0.05	-0.02	-0.02	0.02
	0.05	-0.02	-0.02	0.02
	0.05	-0.02	-0.02	0.02
	0.05	-0.02	-0.02	0.02
	0.05	-0.02	-0.02	0.02
	0.05	-0.02	-0.02	0.02
	0.05	0.12	0.12	0.09
	0.05	0.01	0.01	0.03
	0.05	0.12	0.12	0.09
	0.05	0.01	0.01	0.03
	0.05	0.01	0.01	0.03
	0.05	0.12	0.12	0.09
	0.05	0.01	0.01	0.03
	0.05	0.12	0.12	0.07
	0.05	0.01	0.01	0.03
	0.05	0.12	0.12	0.09
	0.05	0.12	0.12	0.07
	0.05	0.01	0.01	0.03
	0.05	0.12	0.12	0.09
	0.05	-0.01	-0.08	-0.13
	0.05	-0.01	-0.08	-0.13
	0.05	-0.01	-0.08	-0.13
	0.05	-0.01	-0.08	-0.13
	0.05	-0.01	-0.08	-0.13
	0.05	0.13	0.1	0.06
	0.05	0.13	0.1	0.06
	0.05	0.13	0.1	0.06
	0.05	0.13	0.1	0.06
	0.05	0.13	0.1	0.06
	0.05	0.13	0.1	0.06
	0.05	0.13	0.1	0.06
	0.05	0.02	0.02	0.05
	0.05	0.02	0.02	0.05
	0.05	0.02	0.02	0.05
	0.05	0.02	0.02	0.05
	0.05	0.02	0.02	0.05
	0.05	0.02	0.02	0.05
	0.05	0.12	0.12	0.09
	0.05	0.12	0.12	0.09
	0.05	0.12	0.12	0.09
	0.05	0.12	0.12	0.09
	0.06	0.03	-0.01	-0.15
	0.06	0.07	0.05	-0.01
	0.06	0.07	0.05	-0.01
	0.06	0.03	-0.01	-0.15
	0.06	0.07	0.05	-0.01
	0.06	0.03	-0.01	-0.15
	0.06	0.07	0.05	-0.01
	0.06	0.04	0.03	0.04
	0.06	0.07	0.05	-0.01
	0.06	0.07	0.05	-0.01
	0.06	0.07	0.05	-0.01
	0.06	0.07	0.05	-0.01
	0.06	0.07	0.05	-0.01
	0.06	0.07	0.05	-0.01
	0.06	0.07	0.07	0.06
	0.06	0.07	0.07	0.06
	0.06	0.07	0.07	0.06
	0.06	0.07	0.05	-0.01
	0.06	0.06	0.03	0.02
	0.06	0.07	0.05	-0.01
	0.06	0.07	0.05	-0.01
	0.06	0.06	0.03	0.02
	0.06	0.07	0.05	-0.01
	0.06	0.07	0.05	-0.01
	0.06	0.07	0.05	-0.01
	0.06	0.07	0.05	-0.01
	0.06	0.07	0.05	-0.01
	0.06	0.07	0.05	-0.01
	0.06	0.07	0.05	-0.01
	0.06	0.07	0.05	-0.01
	0.06	0.13	0.09	0.04
	0.06	0.03	-0.01	-0.15
	0.06	0.13	0.09	0.04
	0.06	0.03	-0.01	-0.15
	0.06	0.03	-0.01	-0.15
	0.06	0.13	0.09	0.04
	0.06	0.03	-0.01	-0.15
	0.06	0.13	0.09	0.04
	0.06	0.13	0.09	0.04
	0.06	0.03	-0.01	-0.15
	0.06	0.13	0.09	0.04
	0.06	0.03	-0.01	-0.15
	0.06	0.16	0.15	0.13
	0.06	0.16	0.15	0.13
	0.06	0.16	0.15	0.13
	0.06	0.16	0.15	0.13
	0.06	0.16	0.15	0.13
	0.06	0.16	0.15	0.13
	0.06	0.07	0.05	-0.01
	0.06	0.06	0.03	0.02
	0.06	0.07	0.05	-0.01
	0.06	0.06	0.03	0.02
	0.06	0.06	0.03	0.02
	0.06	0.07	0.05	-0.01
	0.06	0.06	0.03	0.02
	0.06	0.07	0.05	-0.01
	0.06	0.07	0.05	-0.01
	0.06	0.06	0.03	0.02
	0.06	0.07	0.05	-0.01
	0.06	0.06	0.03	0.02
	0.06	0.07	0.05	-0.01
	0.06	0.06	0.03	0.02
	0.06	0.07	0.05	-0.01
	0.06	0.06	0.03	0.02
	0.06	0.06	0.03	0.02
	0.06	0.07	0.05	-0.01
	0.06	0.06	0.03	0.02
	0.06	0.07	0.05	-0.01
	0.06	0.07	0.05	-0.01
	0.06	0.07	0.05	-0.01
	0.06	0.06	0.03	0.02
	0.06	-0.01	-0.02	0
	0.06	0.01	0	0.03
	0.06	-0.01	-0.02	0
	0.06	0.01	0	0.03
	0.06	-0.01	-0.02	0
	0.06	0.01	0	0.03
	0.06	-0.01	-0.02	0
	0.06	0.01	0	0.03
	0.07	0.1	0.09	0.09
	0.07	0.15	0.09	0.03
	0.07	0.15	0.09	0.03
	0.07	0.15	0.09	0.03
	0.07	0.15	0.09	0.03
	0.07	0.15	0.09	0.03
	0.07	0.15	0.09	0.03
	0.07	0.1	0.09	0.09
	0.07	0.1	0.09	0.09
	0.07	0.1	0.09	0.09
	0.07	0.1	0.09	0.09
	0.07	0.1	0.09	0.09
	0.07	0.1	0.09	0.09
	0.07	0.06	0.05	0.07
	0.07	0.06	0.05	0.07
	0.07	0.06	0.05	0.07
	0.07	0.06	0.05	0.07
	0.07	0.06	0.05	0.07
	0.07	0.06	0.05	0.07
	0.07	0.06	0.05	0.07
	0.07	0.06	0.05	0.07
	0.07	0.06	0.05	0.07
	0.07	0.06	0.05	0.07
	0.07	0.06	0.05	0.07
	0.07	0.06	0.05	0.07
	0.07	0.1	0.09	0.09
	0.07	0.1	0.09	0.09
	0.07	0.1	0.09	0.09
	0.07	0.1	0.09	0.09
	0.07	0.1	0.09	0.09
	0.07	0.1	0.09	0.09
	0.07	0.05	0.01	0.05
	0.07	0.05	0.01	0.05
	0.07	0.05	0.01	0.05
	0.07	0.05	0.01	0.05
	0.07	0.05	0.01	0.05
	0.08	0.07	0.04	0.05
	0.08	0.07	0.04	0.05
	0.08	0.07	0.04	0.05
	0.08	0.07	0.04	0.05
	0.08	0.07	0.04	0.05
	0.08	0.07	0.04	0.05
	0.08	0.08	0.07	0.06
	0.08	0.08	0.07	0.06
	0.08	0.08	0.07	0.06
	0.08	0.08	0.07	0.06
	0.08	0.08	0.07	0.06
	0.08	0.08	0.07	0.06
	0.08	0.14	0.11	0.02
	0.08	0.14	0.11	0.02
	0.08	0.14	0.11	0.02
	0.08	0.14	0.11	0.02
	0.08	0.06	0.05	0.02
	0.08	0.06	0.05	0.02
	0.08	0.06	0.05	0.02
	0.08	0.06	0.05	0.02
	0.08	0.06	0.05	0.02
	0.08	0.06	0.05	0.02
	0.08	0.1	0.09	0.08
	0.08	0.1	0.09	0.08
	0.08	0.1	0.09	0.08
	0.11	0.3	0.29	0.21
	0.11	0.3	0.29	0.21
	0.12	0.34	0.33	0.24
	0.12	0.34	0.33	0.24
	0.12	0.34	0.33	0.24
	0.12	0.34	0.33	0.24
	0.12	0.34	0.33	0.24
	0.12	0.34	0.33	0.24
	0.12	0.34	0.33	0.24
	0.12	0.33	0.31	0.14
	0.12	0.33	0.31	0.14
	0.12	0.34	0.33	0.24
	0.12	0.33	0.31	0.14
	0.12	0.33	0.31	0.14
	0.12	0.34	0.33	0.24
	0.12	0.33	0.31	0.14
	0.12	0.33	0.31	0.14
	0.12	0.34	0.33	0.24
	0.12	0.33	0.31	0.14
	0.12	0.34	0.33	0.24
	0.12	0.34	0.33	0.24
	0.12	0.33	0.31	0.14
	0.13	0.35	0.34	0.24
	0.13	0.35	0.34	0.24
	0.13	0.35	0.34	0.24
	0.13	0.35	0.34	0.24
	0.13	0.35	0.34	0.24
	0.13	0.35	0.34	0.24
	0.14	0.1	0.08	0.06
	0.14	0.1	0.08	0.06
	0.14	0.1	0.08	0.06
	0.14	0.1	0.08	0.06
	0.14	0.1	0.08	0.06
	0.14	0.1	0.08	0.06
	0.15	0.12	0.1	0.09
	0.15	0.12	0.1	0.09
	0.15	0.12	0.1	0.09
	0.15	0.12	0.1	0.09
	0.15	0.12	0.1	0.09
	0.15	0.12	0.1	0.09
	0.16	0.05	0	-0.07
	0.17	0.07	0.07	0.06
	0.17	0.07	0.07	0.06
	0.17	0.07	0.07	0.06
	0.17	0.07	0.07	0.06
	0.17	0.07	0.07	0.06
	0.17	0.07	0.07	0.06
	0.18	0.07	0.08	0.18
	0.18	0.07	0.08	0.18
	0.18	0.07	0.08	0.18
	0.18	0.07	0.08	0.18
	0.18	0.07	0.08	0.18
	0.18	0.07	0.08	0.18
	0.18	0.07	0.08	0.18
	0.18	0.07	0.08	0.18
	0.18	0.07	0.08	0.18
	0.18	0.07	0.08	0.18
	0.18	0.07	0.08	0.18
	0.18	0.07	0.08	0.18
	0.36	0.17	0.16	0.26
	0.37	0.3	0.29	0.24
	0.37	0.3	0.29	0.24
	0.37	0.3	0.29	0.24
	0.37	0.3	0.29	0.24
	0.37	0.3	0.29	0.24
	0.37	0.3	0.29	0.24
	0.44	0.22	0.18	0.21
	0.44	0.22	0.18	0.21
	0.44	0.22	0.18	0.21
	0.44	0.22	0.18	0.21
	0.44	0.22	0.18	0.21
	0.44	0.22	0.18	0.21
	0.44	0.22	0.18	0.21
	0.44	0.22	0.18	0.21
	0.44	0.22	0.18	0.21
	0.44	0.22	0.18	0.21
	0.44	0.22	0.18	0.21
	0.44	0.22	0.18	0.21
	0.44	0.22	0.18	0.21
	0.44	0.22	0.18	0.21
	0.44	0.22	0.18	0.21
	0.44	0.22	0.18	0.21
	0.44	0.22	0.18	0.21
	0.44	0.22	0.18	0.21
	0.46	0.27	0.2	0.13
	0.46	0.27	0.2	0.13
	0.46	0.27	0.2	0.13
	0.46	0.27	0.2	0.13
	0.46	0.27	0.2	0.13
	0.46	0.27	0.2	0.13
	0.46	0.27	0.2	0.13
	0.46	0.27	0.2	0.13
	0.46	0.27	0.2	0.13
	0.46	0.27	0.2	0.13
	0.46	0.27	0.2	0.13
	0.47	0.3	0.24	0.23
	0.47	0.3	0.24	0.23
	0.47	0.3	0.24	0.23
	0.47	0.3	0.24	0.23
	0.47	0.3	0.24	0.23
	0.47	0.3	0.24	0.23
	0.47	0.3	0.24	0.23
	0.47	0.3	0.24	0.23
	0.47	0.3	0.24	0.23
	0.47	0.3	0.24	0.23
	0.47	0.3	0.24	0.23
	0.47	0.3	0.24	0.23
	0.47	0.3	0.24	0.23
	0.47	0.3	0.24	0.23
	0.47	0.3	0.24	0.23
	0.47	0.3	0.24	0.23
	0.47	0.3	0.24	0.23
	0.47	0.3	0.24	0.23
	0.47	0.3	0.24	0.23
	0.47	0.3	0.24	0.23
	0.47	0.3	0.24	0.23
	0.47	0.3	0.24	0.23
	0.47	0.3	0.24	0.23
	0.47	0.3	0.24	0.23
	0.47	0.3	0.24	0.23
	0.47	0.3	0.24	0.23
	0.47	0.3	0.24	0.23
	0.47	0.3	0.24	0.23
	0.47	0.3	0.24	0.23
	0.47	0.3	0.24	0.23
	0.47	0.3	0.24	0.23
	0.47	0.3	0.24	0.23
	0.47	0.3	0.24	0.23
	0.47	0.3	0.24	0.23
	0.47	0.3	0.24	0.23
	0.47	0.3	0.24	0.23
	0.48	0.31	0.25	0.25
	0.48	0.31	0.25	0.25
	0.48	0.31	0.25	0.25
	0.48	0.31	0.25	0.25
	0.48	0.31	0.25	0.25
	0.48	0.31	0.25	0.25
	0.48	0.31	0.25	0.25
	0.48	0.31	0.25	0.25
	0.48	0.31	0.25	0.25
	0.48	0.31	0.25	0.25
	0.48	0.31	0.25	0.25
	0.48	0.31	0.25	0.25
	0.49	0.31	0.25	0.23
	0.49	0.31	0.25	0.23
	0.49	0.3	0.24	0.21
	0.49	0.3	0.24	0.21
	0.49	0.31	0.25	0.23
	0.49	0.3	0.24	0.21
	0.49	0.31	0.25	0.23
	0.49	0.31	0.25	0.23
	0.49	0.3	0.24	0.21
	0.49	0.31	0.25	0.23
	0.49	0.3	0.24	0.21
	0.49	0.29	0.23	0.22
	0.49	0.29	0.23	0.22
	0.49	0.29	0.23	0.22
	0.49	0.31	0.25	0.23
	0.49	0.29	0.23	0.22
	0.49	0.29	0.23	0.22
	0.49	0.31	0.25	0.23
	0.49	0.29	0.23	0.22
	0.49	0.29	0.23	0.22
	0.49	0.31	0.25	0.23
	0.49	0.29	0.23	0.22
	0.49	0.29	0.23	0.22
	0.49	0.29	0.23	0.22
	0.49	0.31	0.25	0.23
	0.49	0.29	0.23	0.22
	0.49	0.29	0.23	0.22
	0.49	0.31	0.25	0.23
	0.49	0.31	0.25	0.23
	0.49	0.31	0.25	0.23
	0.49	0.31	0.25	0.23
	0.49	0.31	0.25	0.23
	0.49	0.31	0.25	0.23
	0.49	0.31	0.25	0.23
	0.49	0.31	0.25	0.23
	0.49	0.31	0.25	0.23
	0.49	0.31	0.25	0.23
	0.49	0.31	0.25	0.23
	0.49	0.31	0.25	0.23
	0.49	0.31	0.25	0.23
	0.49	0.31	0.25	0.23
	0.49	0.31	0.25	0.23
	0.49	0.31	0.25	0.23
	0.49	0.31	0.25	0.23
	0.49	0.31	0.25	0.23
	0.49	0.31	0.25	0.23
	0.49	0.3	0.24	0.21
	0.49	0.3	0.24	0.21
	0.49	0.3	0.24	0.21
	0.49	0.3	0.24	0.21
	0.49	0.3	0.24	0.21
	0.49	0.3	0.24	0.21
	0.49	0.3	0.24	0.21
	0.49	0.3	0.24	0.21
	0.49	0.3	0.24	0.21
	0.49	0.3	0.24	0.21
	0.49	0.3	0.24	0.21
	0.49	0.3	0.24	0.21
	0.86	0.63	0.55	0.76
	0.86	0.63	0.55	0.76
	0.9	0.61	0.52	0.74
	0.9	0.61	0.52	0.74

## Sheet: CONCLUSIONS
			N	1152	1152	1152	1152
			MIN	-0.9	-0.63	-0.55	-0.76
			MAX	0.9	0.63	0.55	0.76
			SUM	41.22	31.24	27.64	28.74
			as % of +- of MAX	0.271006	0.225397	0.221474	0.224146
			>0	0.579861	0.612847	0.612847	0.636285
			AVG	0.0357813	0.0271181	0.0239931	0.0249479
			MED	0.02	0.03	0.03	0.03
			ST.DEV.S	0.229824	0.17035	0.150087	0.16455
			VAR	0.0528192	0.029019	0.0225262	0.0270766
			Coeff. of Variation	6.42304	6.28178	6.25544	6.59573
			Variance-to-mean ratio	1.47617	1.0701	0.938862	1.08533
			IQR	0.08	0.14	0.13	0.13
			Quartile coeff. of dispersion	2	7	2.6	2.6
			Sn	0.083482	0.107334	0.107334	0.107334
			Qn	0.0884831	0.110604	0.110604	0.110604
			IDR	0.55	0.43	0.36	0.36
			MADM	0.04	0.07	0.07	0.06
			AADA (MAD)	0.132477	0.116003	0.10398	0.105803	not normal
			AADM	0.130191	0.115868	0.103542	0.105382
			K * MADM	0.059304	0.103782	0.103782	0.088956
			Tau	0.0746716	0.122415	0.121277	0.113496
				+D/100 or -D/100
				SLOF score	SAOF score	SMOF score	LRA score
				-0.9	-0.61	-0.52	-0.74
				-0.9	-0.61	-0.52	-0.74
				-0.9	-0.61	-0.52	-0.74
				-0.9	-0.61	-0.52	-0.74
				-0.86	-0.63	-0.55	-0.76
				-0.86	-0.6	-0.52	-0.74
				-0.86	-0.63	-0.55	-0.76
				-0.86	-0.6	-0.52	-0.74
				-0.86	-0.6	-0.52	-0.74
				-0.86	-0.63	-0.55	-0.76
				-0.86	-0.6	-0.52	-0.74
				-0.86	-0.63	-0.55	-0.76
				-0.86	-0.6	-0.52	-0.74
				-0.86	-0.6	-0.52	-0.74
				-0.84	-0.62	-0.54	-0.74
				-0.84	-0.62	-0.54	-0.74
				-0.84	-0.62	-0.54	-0.74
				-0.84	-0.62	-0.54	-0.74
				-0.84	-0.62	-0.54	-0.74
				-0.84	-0.62	-0.54	-0.74
				-0.49	-0.3	-0.24	-0.21
				-0.49	-0.31	-0.25	-0.23
				-0.49	-0.31	-0.25	-0.23
				-0.49	-0.31	-0.25	-0.23
				-0.49	-0.31	-0.25	-0.23
				-0.49	-0.31	-0.25	-0.23
				-0.49	-0.31	-0.25	-0.23
				-0.49	-0.31	-0.25	-0.23
				-0.49	-0.31	-0.25	-0.23
				-0.49	-0.31	-0.25	-0.23
				-0.49	-0.31	-0.25	-0.23
				-0.49	-0.31	-0.25	-0.23
				-0.49	-0.31	-0.25	-0.23
				-0.49	-0.31	-0.25	-0.23
				-0.49	-0.31	-0.25	-0.23
				-0.49	-0.31	-0.25	-0.23
				-0.49	-0.31	-0.25	-0.23
				-0.49	-0.31	-0.25	-0.23
				-0.49	-0.31	-0.25	-0.23
				-0.49	-0.31	-0.25	-0.23
				-0.48	-0.31	-0.25	-0.25
				-0.48	-0.31	-0.25	-0.25
				-0.48	-0.31	-0.25	-0.25
				-0.48	-0.31	-0.25	-0.25
				-0.48	-0.31	-0.25	-0.25
				-0.48	-0.31	-0.25	-0.25
				-0.46	-0.27	-0.2	-0.13
				-0.43	-0.14	0.01	0.06
				-0.43	-0.14	0.01	0.06
				-0.43	-0.14	0.01	0.06
				-0.43	-0.14	0.01	0.06
				-0.43	-0.14	0.01	0.06
				-0.43	-0.14	0.01	0.06
				-0.37	-0.12	-0.08	-0.06
				-0.37	-0.12	-0.08	-0.06
				-0.37	-0.12	-0.08	-0.06
				-0.37	-0.12	-0.08	-0.06
				-0.37	-0.12	-0.08	-0.06
				-0.37	-0.12	-0.08	-0.06
				-0.36	-0.17	-0.16	-0.26
				-0.36	-0.17	-0.16	-0.26
				-0.36	-0.17	-0.16	-0.26
				-0.36	-0.17	-0.16	-0.26
				-0.36	-0.17	-0.16	-0.26
				-0.25	-0.11	-0.12	-0.07
				-0.25	-0.11	-0.12	-0.07
				-0.25	-0.11	-0.12	-0.07
				-0.25	-0.11	-0.12	-0.07
				-0.25	-0.11	-0.12	-0.07
				-0.25	-0.11	-0.12	-0.07
				-0.17	-0.03	0.02	0.16
				-0.17	-0.03	0.02	0.16
				-0.17	-0.03	0.02	0.16
				-0.17	-0.03	0.02	0.16
				-0.17	-0.03	0.02	0.16
				-0.17	-0.03	0.02	0.16
				-0.16	-0.05	0	0.07
				-0.16	-0.05	0	0.07
				-0.16	-0.05	0	0.07
				-0.16	-0.05	0	0.07
				-0.16	-0.05	0	0.07
				-0.16	-0.05	0	0.07
				-0.16	-0.05	0	0.07
				-0.16	-0.05	0	0.07
				-0.16	-0.05	0	0.07
				-0.16	-0.05	0	0.07
				-0.16	-0.05	0	0.07
				-0.12	-0.34	-0.33	-0.24
				-0.12	-0.34	-0.33	-0.24
				-0.12	-0.34	-0.33	-0.24
				-0.12	-0.34	-0.33	-0.24
				-0.12	-0.34	-0.33	-0.24
				-0.12	-0.34	-0.33	-0.24
				-0.12	-0.34	-0.33	-0.24
				-0.12	-0.34	-0.33	-0.24
				-0.12	-0.34	-0.33	-0.24
				-0.12	-0.33	-0.31	-0.14
				-0.12	-0.33	-0.31	-0.14
				-0.12	-0.34	-0.33	-0.24
				-0.12	-0.33	-0.31	-0.14
				-0.12	-0.34	-0.33	-0.24
				-0.12	-0.34	-0.33	-0.24
				-0.12	-0.33	-0.31	-0.14
				-0.12	0.07	0.08	0.05
				-0.12	0.07	0.08	0.05
				-0.12	0.07	0.08	0.05
				-0.12	0.07	0.08	0.05
				-0.12	0.07	0.08	0.05
				-0.12	0.07	0.08	0.05
				-0.11	-0.3	-0.29	-0.21
				-0.11	-0.3	-0.29	-0.21
				-0.11	-0.3	-0.29	-0.21
				-0.11	-0.3	-0.29	-0.21
				-0.09	0.04	0.05	0.04
				-0.09	0.04	0.05	0.04
				-0.09	0.04	0.05	0.04
				-0.09	0.04	0.05	0.04
				-0.09	0.04	0.05	0.04
				-0.09	0.04	0.05	0.04
				-0.08	-0.11	-0.09	-0.07
				-0.08	-0.14	-0.11	-0.02
				-0.08	-0.11	-0.09	-0.07
				-0.08	-0.14	-0.11	-0.02
				-0.08	-0.11	-0.09	-0.07
				-0.08	-0.11	-0.09	-0.07
				-0.08	-0.11	-0.09	-0.07
				-0.08	-0.11	-0.09	-0.07
				-0.08	-0.1	-0.09	-0.08
				-0.08	-0.1	-0.09	-0.08
				-0.08	-0.1	-0.09	-0.08
				-0.07	-0.1	-0.09	-0.09
				-0.07	-0.1	-0.09	-0.09
				-0.07	-0.1	-0.09	-0.09
				-0.07	-0.1	-0.09	-0.09
				-0.07	-0.1	-0.09	-0.09
				-0.07	-0.16	-0.12	-0.04
				-0.07	-0.16	-0.12	-0.04
				-0.07	-0.16	-0.12	-0.04
				-0.07	-0.16	-0.12	-0.04
				-0.07	-0.16	-0.12	-0.04
				-0.07	-0.16	-0.12	-0.04
				-0.07	-0.05	-0.01	-0.05
				-0.07	-0.12	-0.12	-0.11
				-0.07	-0.12	-0.12	-0.11
				-0.07	-0.12	-0.12	-0.11
				-0.07	-0.12	-0.12	-0.11
				-0.07	-0.12	-0.12	-0.11
				-0.07	-0.12	-0.12	-0.11
				-0.06	-0.17	-0.16	-0.13
				-0.06	-0.03	0.01	0.15
				-0.06	-0.04	-0.03	-0.04
				-0.06	-0.03	0.01	0.15
				-0.06	-0.17	-0.16	-0.13
				-0.06	-0.04	-0.03	-0.04
				-0.06	-0.04	-0.03	-0.04
				-0.06	-0.03	0.01	0.15
				-0.06	-0.17	-0.16	-0.13
				-0.06	-0.04	-0.03	-0.04
				-0.06	-0.17	-0.16	-0.13
				-0.06	-0.03	0.01	0.15
				-0.06	-0.04	-0.03	-0.04
				-0.06	-0.17	-0.16	-0.13
				-0.06	-0.03	0.01	0.15
				-0.06	-0.04	-0.03	-0.04
				-0.06	-0.03	0.01	0.15
				-0.06	-0.17	-0.16	-0.13
				-0.06	-0.03	0.01	0.15
				-0.06	-0.07	-0.05	0.01
				-0.06	-0.07	-0.05	0.01
				-0.06	-0.03	0.01	0.15
				-0.06	-0.03	0.01	0.15
				-0.06	-0.04	-0.03	-0.04
				-0.06	-0.04	-0.03	-0.04
				-0.06	-0.04	-0.03	-0.04
				-0.06	-0.04	-0.03	-0.04
				-0.06	-0.04	-0.03	-0.04
				-0.06	-0.07	-0.07	-0.06
				-0.06	-0.07	-0.07	-0.06
				-0.06	-0.07	-0.07	-0.06
				-0.06	-0.06	-0.03	-0.02
				-0.06	-0.06	-0.03	-0.02
				-0.06	-0.06	-0.03	-0.02
				-0.06	-0.07	-0.05	0.01
				-0.06	-0.06	-0.03	-0.02
				-0.06	-0.18	-0.15	0.04
				-0.06	-0.18	-0.15	0.04
				-0.06	-0.18	-0.15	0.04
				-0.06	-0.18	-0.15	0.04
				-0.06	-0.18	-0.15	0.04
				-0.06	-0.18	-0.15	0.04
				-0.06	-0.07	-0.05	0.01
				-0.06	-0.07	-0.05	0.01
				-0.06	-0.07	-0.05	0.01
				-0.06	-0.07	-0.05	0.01
				-0.06	-0.07	-0.05	0.01
				-0.06	-0.07	-0.05	0.01
				-0.06	-0.06	-0.03	-0.02
				-0.06	-0.01	0	-0.03
				-0.06	0.01	0.02	0
				-0.06	0.01	0.02	0
				-0.06	-0.01	0	-0.03
				-0.05	-0.13	-0.1	-0.06
				-0.05	-0.13	-0.1	-0.06
				-0.05	-0.13	-0.1	-0.06
				-0.05	-0.13	-0.1	-0.06
				-0.05	-0.13	-0.1	-0.06
				-0.05	-0.13	-0.1	-0.06
				-0.05	-0.12	-0.12	-0.07
				-0.05	-0.12	-0.12	-0.07
				-0.05	-0.12	-0.12	-0.07
				-0.05	-0.12	-0.12	-0.07
				-0.05	-0.12	-0.12	-0.09
				-0.05	0.01	0.08	0.13
				-0.05	-0.13	-0.1	-0.06
				-0.05	-0.13	-0.1	-0.06
				-0.05	-0.13	-0.1	-0.06
				-0.05	-0.13	-0.1	-0.06
				-0.05	-0.13	-0.1	-0.06
				-0.05	-0.12	-0.12	-0.09
				-0.05	-0.12	-0.12	-0.09
				-0.04	-0.02	-0.01	-0.01
				-0.04	-0.02	-0.01	-0.01
				-0.04	-0.02	-0.01	-0.01
				-0.04	-0.02	-0.01	-0.01
				-0.04	-0.02	-0.01	-0.01
				-0.04	-0.02	-0.01	-0.01
				-0.04	-0.12	-0.12	-0.11
				-0.04	-0.12	-0.12	-0.11
				-0.04	-0.12	-0.12	-0.11
				-0.04	-0.12	-0.12	-0.11
				-0.04	-0.12	-0.12	-0.11
				-0.04	-0.12	-0.12	-0.11
				-0.04	0.02	0.04	0
				-0.04	0.02	0.04	0
				-0.04	0.02	0.04	0
				-0.04	0.02	0.04	0
				-0.04	0.02	0.04	0
				-0.04	0.02	0.04	0
				-0.04	0.02	0.03	0.02
				-0.04	0.02	0.03	0.02
				-0.04	0.02	0.03	0.02
				-0.04	0.02	0.03	0.02
				-0.04	0.02	0.03	0.02
				-0.04	-0.07	-0.04	-0.04
				-0.04	-0.07	-0.04	-0.04
				-0.04	-0.07	-0.04	-0.04
				-0.04	-0.07	-0.04	-0.04
				-0.03	-0.03	-0.03	-0.05
				-0.03	-0.08	-0.11	-0.24
				-0.03	-0.07	-0.07	-0.05
				-0.03	-0.08	-0.11	-0.24
				-0.03	-0.08	-0.11	-0.24
				-0.03	-0.07	-0.07	-0.05
				-0.03	-0.08	-0.11	-0.24
				-0.03	-0.08	-0.11	-0.24
				-0.03	-0.07	-0.07	-0.05
				-0.03	-0.08	-0.11	-0.24
				-0.03	-0.08	-0.11	-0.24
				-0.03	-0.07	-0.07	-0.05
				-0.03	-0.08	-0.11	-0.24
				-0.03	-0.07	-0.07	-0.05
				-0.03	-0.08	-0.11	-0.24
				-0.03	-0.08	-0.11	-0.24
				-0.03	-0.07	-0.07	-0.05
				-0.03	-0.08	-0.11	-0.24
				-0.03	-0.08	-0.11	-0.24
				-0.03	-0.05	-0.03	-0.04
				-0.03	-0.05	-0.03	-0.04
				-0.03	0.06	0.1	0.07
				-0.03	0.06	0.1	0.07
				-0.03	0.06	0.1	0.07
				-0.03	0.06	0.1	0.07
				-0.03	0.06	0.1	0.07
				-0.03	0.06	0.1	0.07
				-0.03	-0.13	-0.16	-0.12
				-0.03	-0.13	-0.16	-0.12
				-0.03	-0.13	-0.16	-0.12
				-0.03	-0.13	-0.16	-0.12
				-0.03	-0.13	-0.16	-0.12
				-0.03	-0.13	-0.16	-0.12
				-0.03	-0.13	-0.16	-0.12
				-0.03	-0.13	-0.16	-0.12
				-0.03	-0.13	-0.16	-0.12
				-0.03	-0.13	-0.16	-0.12
				-0.03	-0.13	-0.16	-0.12
				-0.03	-0.13	-0.16	-0.12
				-0.02	-0.11	-0.19	-0.15
				-0.02	-0.11	-0.19	-0.15
				-0.02	-0.11	-0.19	-0.15
				-0.02	-0.11	-0.19	-0.15
				-0.02	-0.11	-0.19	-0.15
				-0.02	-0.11	-0.19	-0.15
				-0.02	-0.06	-0.07	-0.04
				-0.02	-0.06	-0.07	-0.04
				-0.02	-0.06	-0.07	-0.04
				-0.02	-0.06	-0.07	-0.04
				-0.02	-0.06	-0.07	-0.04
				-0.02	-0.06	-0.07	-0.04
				-0.02	-0.06	-0.07	-0.04
				-0.02	-0.06	-0.07	-0.04
				-0.02	-0.06	-0.07	-0.04
				-0.02	-0.06	-0.07	-0.04
				-0.02	-0.06	-0.07	-0.04
				-0.02	-0.07	-0.03	0.03
				-0.02	-0.07	-0.03	0.03
				-0.02	-0.07	-0.03	0.03
				-0.02	-0.07	-0.03	0.03
				-0.02	-0.07	-0.03	0.03
				-0.02	-0.07	-0.03	0.03
				-0.02	-0.08	-0.07	-0.02
				-0.02	-0.08	-0.07	-0.02
				-0.02	-0.08	-0.07	-0.02
				-0.02	-0.08	-0.07	-0.02
				-0.02	-0.08	-0.07	-0.02
				-0.02	-0.08	-0.07	-0.02
				-0.02	-0.03	-0.04	-0.11
				-0.02	-0.03	-0.04	-0.11
				-0.02	-0.03	-0.04	-0.11
				-0.02	-0.03	-0.04	-0.11
				-0.02	-0.03	-0.04	-0.11
				-0.02	-0.03	-0.04	-0.11
				-0.02	0.06	0.1	0.07
				-0.02	0.06	0.1	0.07
				-0.02	0.06	0.1	0.07
				-0.02	0.06	0.1	0.07
				-0.02	0.06	0.1	0.07
				-0.02	0.06	0.1	0.07
				-0.02	-0.08	-0.07	-0.02
				-0.02	-0.08	-0.07	-0.02
				-0.02	-0.08	-0.07	-0.02
				-0.02	-0.08	-0.07	-0.02
				-0.02	-0.08	-0.07	-0.02
				-0.02	-0.08	-0.07	-0.02
				-0.02	-0.04	-0.05	-0.12
				-0.02	-0.08	-0.11	-0.26
				-0.02	-0.04	-0.05	-0.12
				-0.02	-0.08	-0.07	-0.02
				-0.02	-0.08	-0.07	-0.02
				-0.02	-0.04	-0.05	-0.12
				-0.02	-0.08	-0.07	-0.02
				-0.02	-0.04	-0.05	-0.12
				-0.02	-0.08	-0.07	-0.02
				-0.02	-0.04	-0.05	-0.12
				-0.02	-0.08	-0.07	-0.02
				-0.02	-0.08	-0.11	-0.26
				-0.02	-0.04	-0.05	-0.12
				-0.02	0	0	-0.03
				-0.02	0.06	0.07	0.03
				-0.02	0.06	0.07	0.03
				-0.02	0	0	-0.03
				-0.02	0.06	0.07	0.03
				-0.02	0.06	0.07	0.03
				-0.02	0.06	0.07	0.03
				-0.02	0.06	0.07	0.03
				-0.02	0.06	0.07	0.03
				-0.02	0	0	-0.03
				-0.02	0.06	0.07	0.03
				-0.02	0.06	0.07	0.03
				-0.02	0	0	-0.03
				-0.02	0.06	0.07	0.03
				-0.02	-0.02	0.03	0.02
				-0.02	0	0	-0.03
				-0.02	0	0	-0.03
				-0.02	-0.02	0.03	0.02
				-0.01	-0.07	-0.05	0.06
				-0.01	-0.07	-0.1	-0.24
				-0.01	-0.07	-0.05	0.06
				-0.01	-0.07	-0.1	-0.24
				-0.01	0.07	0.07	0.04
				-0.01	-0.07	-0.05	0.06
				-0.01	0.07	0.07	0.04
				-0.01	-0.07	-0.05	0.06
				-0.01	-0.07	-0.1	-0.24
				-0.01	0.07	0.07	0.04
				-0.01	-0.07	-0.05	0.06
				-0.01	0.07	0.07	0.04
				-0.01	-0.07	-0.1	-0.24
				-0.01	-0.07	-0.05	0.06
				-0.01	0	0.02	-0.04
				-0.01	-0.06	-0.1	0.03
				-0.01	-0.06	-0.1	0.03
				-0.01	-0.06	-0.1	0.03
				-0.01	-0.06	-0.1	0.03
				-0.01	-0.06	-0.1	0.03
				-0.01	-0.06	-0.1	0.03
				-0.01	-0.02	-0.02	0.01
				-0.01	-0.12	-0.12	-0.06
				-0.01	-0.02	-0.02	0.01
				-0.01	-0.12	-0.12	-0.06
				-0.01	-0.12	-0.12	-0.06
				-0.01	-0.02	-0.02	0.01
				-0.01	-0.12	-0.12	-0.06
				-0.01	-0.02	-0.02	0.01
				-0.01	-0.02	-0.02	0.01
				-0.01	-0.12	-0.12	-0.06
				-0.01	-0.02	-0.02	0.01
				-0.01	-0.12	-0.12	-0.06
				-0.01	0.02	0.03	0.02
				-0.01	0.02	0.03	0.02
				-0.01	0.02	0.03	0.02
				-0.01	0.02	0.03	0.02
				-0.01	0.02	0.03	0.02
				-0.01	0.06	0.16	0.23
				-0.01	0.06	0.16	0.23
				-0.01	0.06	0.16	0.23
				-0.01	0.06	0.16	0.23
				-0.01	0.06	0.16	0.23
				-0.01	0.06	0.16	0.23
				-0.01	0.02	0.03	0.02
				-0.01	0.02	0.03	0.02
				-0.01	0.02	0.03	0.02
				-0.01	0.02	0.03	0.02
				0	0.02	0.03	0.02
				0	0.02	0.03	0.02
				0	0.02	0.03	0.02
				0	0.02	0.03	0.02
				0	0.02	0.03	0.02
				0	0.02	0.03	0.02
				0	0.03	0.02	-0.05
				0	0	0	-0.03
				0	0.03	0.02	-0.05
				0	0	0	-0.03
				0	0	0	0.03
				0	0.03	0.02	-0.05
				0	0	0	-0.03
				0	0.03	0.02	-0.05
				0	0	0	0.03
				0	0.03	0.02	-0.05
				0	0	0	-0.03
				0	0.03	0.02	-0.05
				0	-0.02	0	0.02
				0	-0.01	-0.02	-0.05
				0	-0.02	0	0.02
				0	-0.01	-0.02	-0.05
				0	-0.01	-0.02	-0.05
				0	-0.02	0	0.02
				0	-0.01	-0.02	-0.05
				0	-0.02	0	0.02
				0	-0.01	-0.02	-0.05
				0	-0.02	0	0.02
				0	-0.01	-0.02	-0.05
				0	-0.02	0	0.02
				0	-0.03	-0.02	0.05
				0	0.03	0.02	-0.05
				0	0.03	0.02	-0.05
				0	0.03	0.02	-0.05
				0	0.03	0.02	-0.05
				0	0.03	0.02	-0.05
				0	0.06	0.07	0.05
				0	0.06	0.07	0.05
				0	0.06	0.07	0.05
				0	0.06	0.07	0.05
				0	0.06	0.07	0.05
				0	0.06	0.07	0.05
				0	-0.02	0	0.17
				0	-0.02	0	0.17
				0	-0.02	0	0.17
				0	-0.02	0	0.17
				0	-0.02	0	0.17
				0	-0.02	0	0.17
				0	-0.03	-0.02	0.05
				0	-0.03	-0.02	0.05
				0	-0.03	-0.02	0.05
				0	-0.03	-0.02	0.05
				0	-0.03	-0.02	0.05
				0	-0.03	-0.02	0.05
				0	0.01	0.02	-0.03
				0	0.01	0.02	-0.03
				0	0.01	0.02	-0.03
				0	0.01	0.02	-0.03
				0	0.01	0.02	-0.03
				0	0.01	0.02	-0.03
				0	0.01	0.02	-0.03
				0	0.01	0.02	-0.03
				0	0.01	0.02	-0.03
				0	0.01	0.02	-0.03
				0	0.01	0.02	-0.03
				0	0.01	0.02	-0.03
				0	0.06	0.07	0.05
				0	0.06	0.07	0.05
				0	0.06	0.07	0.05
				0	0.06	0.07	0.05
				0	0.06	0.07	0.05
				0	0.06	0.07	0.05
				0.01	-0.07	-0.07	-0.04
				0.01	-0.07	-0.07	-0.04
				0.01	0.07	0.1	0.24
				0.01	0.07	0.1	0.24
				0.01	0.02	0.02	0.03
				0.01	0.07	0.07	0.04
				0.01	0.02	0.02	0.03
				0.01	0.07	0.07	0.04
				0.01	0.07	0.07	0.04
				0.01	0.02	0.02	0.03
				0.01	0.07	0.07	0.04
				0.01	0.02	0.02	0.03
				0.01	0.07	0.07	0.04
				0.01	0.02	0.02	0.03
				0.01	0.07	0.07	0.04
				0.01	0.02	0.02	0.03
				0.01	0	-0.02	0.04
				0.01	0	-0.02	0.04
				0.01	0	-0.02	0.04
				0.01	0	-0.02	0.04
				0.01	0	-0.02	0.04
				0.01	0.07	0.07	0
				0.01	0.07	0.07	0
				0.01	0.07	0.07	0
				0.01	0.07	0.07	0
				0.01	0.07	0.07	0
				0.01	0.07	0.07	0
				0.01	0.08	0.13	0.02
				0.01	0.08	0.13	0.02
				0.01	0.08	0.13	0.02
				0.01	0.08	0.13	0.02
				0.01	0.08	0.13	0.02
				0.01	0.08	0.13	0.02
				0.01	-0.02	-0.03	-0.02
				0.01	0.07	0.1	0.24
				0.01	-0.07	-0.07	-0.04
				0.01	-0.07	-0.07	-0.04
				0.01	0.07	0.1	0.24
				0.01	-0.07	-0.07	-0.04
				0.01	0.07	0.1	0.24
				0.01	0.07	0.1	0.24
				0.01	-0.07	-0.07	-0.04
				0.01	0.07	0.1	0.24
				0.01	-0.07	-0.07	-0.04
				0.01	-0.07	-0.07	-0.04
				0.01	0.07	0.1	0.24
				0.01	-0.12	-0.12	-0.09
				0.01	-0.12	-0.12	-0.09
				0.01	-0.12	-0.12	-0.09
				0.01	-0.12	-0.12	-0.09
				0.01	-0.12	-0.12	-0.09
				0.01	-0.12	-0.12	-0.09
				0.01	0.03	0.04	0.1
				0.01	0.07	0.1	0.24
				0.01	0.03	0.04	0.1
				0.01	0.07	0.1	0.24
				0.01	0.07	0.1	0.24
				0.01	0.03	0.04	0.1
				0.01	0.07	0.1	0.24
				0.01	0.03	0.04	0.1
				0.01	0.07	0.1	0.24
				0.01	0.03	0.04	0.1
				0.01	0.07	0.1	0.24
				0.01	0.03	0.04	0.1
				0.01	0.02	0.03	0.04
				0.01	0.02	0.03	0.04
				0.01	0.02	0.03	0.04
				0.01	0.02	0.03	0.04
				0.01	0.02	0.03	0.04
				0.01	0.02	0.03	0.04
				0.01	0.02	0.03	0.04
				0.01	0.02	0.03	0.04
				0.01	0.02	0.03	0.04
				0.01	0.02	0.03	0.04
				0.01	0.02	0.03	0.04
				0.01	0.02	0.03	0.04
				0.01	-0.02	-0.03	-0.02
				0.01	-0.02	-0.03	-0.02
				0.02	0.01	0	-0.04
				0.02	0.06	0.07	0.04
				0.02	0.01	0	-0.04
				0.02	0.01	0	-0.04
				0.02	0.01	0	-0.04
				0.02	0.01	0	-0.04
				0.02	0.01	0	-0.04
				0.02	0.02	0.04	0.04
				0.02	0.02	0.04	0.04
				0.02	0.02	0.04	0.04
				0.02	0.02	0.04	0.04
				0.02	0.02	0.04	0.04
				0.02	0.02	0.04	0.04
				0.02	0.05	0.03	-0.15
				0.02	0.05	0.03	-0.15
				0.02	0.05	0.03	-0.15
				0.02	0.05	0.03	-0.15
				0.02	0.05	0.03	-0.15
				0.02	0.05	0.03	-0.15
				0.02	0.08	0.07	0.02
				0.02	0.08	0.11	0.26
				0.02	0.08	0.11	0.26
				0.02	0.08	0.11	0.26
				0.02	0.08	0.11	0.26
				0.02	0	0	0.03
				0.02	0.08	0.18	0.25
				0.02	0	0	0.03
				0.02	0.08	0.18	0.25
				0.02	0.08	0.18	0.25
				0.02	0	0	0.03
				0.02	0.08	0.18	0.25
				0.02	0	0	0.03
				0.02	0.08	0.18	0.25
				0.02	0	0	0.03
				0.02	0.08	0.18	0.25
				0.02	0	0	0.03
				0.02	-0.06	-0.07	-0.03
				0.02	-0.06	-0.07	-0.03
				0.02	0	0	0.03
				0.02	0	0	0.03
				0.02	0.02	-0.03	-0.02
				0.02	0	0	0.03
				0.02	0	0	0.03
				0.02	0.02	-0.03	-0.02
				0.02	0	0	0.03
				0.02	0.02	-0.03	-0.02
				0.02	0	0	0.03
				0.02	0.02	-0.03	-0.02
				0.03	0.05	0.03	0.04
				0.03	0.05	0.03	0.04
				0.03	0.05	0.03	0.04
				0.03	0.05	0.03	0.04
				0.03	0.05	0.03	0.04
				0.03	0.05	0.03	0.04
				0.03	-0.08	-0.11	-0.05
				0.03	-0.08	-0.11	-0.05
				0.03	-0.08	-0.11	-0.05
				0.03	-0.08	-0.11	-0.05
				0.03	-0.08	-0.11	-0.05
				0.03	-0.08	-0.11	-0.05
				0.03	0.08	0.11	0.24
				0.03	0.08	0.11	0.24
				0.03	0.08	0.11	0.24
				0.03	0.08	0.11	0.24
				0.03	0.08	0.11	0.24
				0.03	0.08	0.11	0.24
				0.03	0.07	0.07	0.05
				0.03	0.08	0.11	0.24
				0.03	0.07	0.07	0.05
				0.03	0.08	0.11	0.24
				0.03	0.08	0.11	0.24
				0.03	0.07	0.07	0.05
				0.03	0.08	0.11	0.24
				0.03	0.07	0.07	0.05
				0.03	0.07	0.07	0.05
				0.03	0.08	0.11	0.24
				0.03	0.07	0.07	0.05
				0.03	0.08	0.11	0.24
				0.03	0.05	0.03	0.04
				0.03	0.05	0.03	0.04
				0.03	0.05	0.03	0.04
				0.03	0.05	0.03	0.04
				0.03	0.05	0.03	0.04
				0.03	0.05	0.03	0.04
				0.03	0.05	0.03	0.04
				0.03	0.05	0.03	0.04
				0.03	0.05	0.03	0.04
				0.03	0.05	0.03	0.04
				0.03	0.05	0.03	0.04
				0.03	0.05	0.03	0.04
				0.03	0.12	0.14	0.02
				0.03	0.12	0.14	0.02
				0.03	0.12	0.14	0.02
				0.03	0.12	0.14	0.02
				0.03	0.12	0.14	0.02
				0.03	0.12	0.14	0.02
				0.03	0.05	0.03	0.04
				0.03	0.03	0.04	0.08
				0.03	0.05	0.03	0.04
				0.03	0.07	0.1	0.22
				0.03	0.05	0.03	0.04
				0.03	0.03	0.04	0.08
				0.03	0.05	0.03	0.04
				0.03	0.07	0.1	0.22
				0.03	0.07	0.1	0.22
				0.03	0.05	0.03	0.04
				0.03	0.03	0.04	0.08
				0.03	0.05	0.03	0.04
				0.03	0.07	0.1	0.22
				0.03	0.05	0.03	0.04
				0.03	0.03	0.04	0.08
				0.03	0.05	0.03	0.04
				0.03	0.05	0.03	0.04
				0.03	0.07	0.1	0.22
				0.03	0.05	0.03	0.04
				0.03	0.03	0.04	0.08
				0.03	0.05	0.03	0.04
				0.03	0.07	0.1	0.22
				0.03	0.05	0.03	0.04
				0.03	0.03	0.04	0.08
				0.03	-0.02	-0.03	0.01
				0.03	-0.02	-0.03	0.01
				0.03	-0.02	-0.03	0.01
				0.03	-0.02	-0.03	0.01
				0.03	-0.02	-0.03	0.01
				0.03	-0.02	-0.03	0.01
				0.03	0.03	0.03	0.05
				0.03	0.03	0.03	0.05
				0.03	0.03	0.03	0.05
				0.03	0.03	0.03	0.05
				0.03	0.03	0.03	0.05
				0.03	0.03	0.03	0.05
				0.03	0.03	0.03	0.05
				0.03	0.03	0.03	0.05
				0.03	0.03	0.03	0.05
				0.03	0.03	0.03	0.05
				0.03	0.03	0.03	0.05
				0.03	0.05	0.03	0.04
				0.03	0.05	0.03	0.04
				0.03	0.05	0.03	0.04
				0.03	0.05	0.03	0.04
				0.03	0.05	0.03	0.04
				0.03	0.05	0.03	0.04
				0.03	0.05	0.03	0.04
				0.03	0.05	0.03	0.04
				0.03	0.05	0.03	0.04
				0.03	0.05	0.03	0.04
				0.03	0.05	0.03	0.04
				0.03	0.05	0.03	0.04
				0.03	0.05	0.03	0.04
				0.03	0.05	0.03	0.04
				0.03	0.05	0.03	0.04
				0.03	0.05	0.03	0.04
				0.03	0.05	0.03	0.04
				0.03	0.05	0.03	0.04
				0.03	0.05	0.03	0.04
				0.03	0.05	0.03	0.04
				0.03	0.05	0.03	0.04
				0.03	0.05	0.03	0.04
				0.03	0.02	0.02	0.02
				0.03	0.02	0.02	0.02
				0.03	0.02	0.02	0.02
				0.03	0.02	0.02	0.02
				0.03	0.02	0.02	0.02
				0.03	0.02	0.02	0.02
				0.03	-0.06	-0.1	-0.07
				0.03	-0.06	-0.1	-0.07
				0.03	-0.06	-0.1	-0.07
				0.03	-0.06	-0.1	-0.07
				0.03	-0.06	-0.1	-0.07
				0.03	-0.06	-0.1	-0.07
				0.03	0.02	0.02	0.02
				0.03	0.04	0.04	0.06
				0.03	0.02	0.02	0.02
				0.03	0.04	0.04	0.06
				0.03	0.04	0.04	0.06
				0.03	0.02	0.02	0.02
				0.03	0.04	0.04	0.06
				0.03	0.02	0.02	0.02
				0.03	0.04	0.04	0.06
				0.03	0.02	0.02	0.02
				0.03	0.04	0.04	0.06
				0.03	0.02	0.02	0.02
				0.04	0.04	0.02	0.02
				0.04	0.04	0.02	0.02
				0.04	0.04	0.02	0.02
				0.04	0.04	0.02	0.02
				0.04	0.04	0.02	0.02
				0.04	0.04	0.02	0.02
				0.04	0.04	0.05	0.06
				0.04	0.04	0.05	0.06
				0.04	0.04	0.05	0.06
				0.04	0.04	0.05	0.06
				0.04	0.04	0.05	0.06
				0.04	0.04	0.05	0.06
				0.04	-0.02	-0.03	-0.02
				0.04	0.07	0.04	0.04
				0.04	0.07	0.04	0.04
				0.05	0.15	0.15	0.03
				0.05	0.15	0.15	0.03
				0.05	0.15	0.15	0.03
				0.05	0.15	0.15	0.03
				0.05	0.15	0.15	0.03
				0.05	0.15	0.15	0.03
				0.05	-0.02	-0.02	0.02
				0.05	-0.02	-0.02	0.02
				0.05	-0.02	-0.02	0.02
				0.05	-0.02	-0.02	0.02
				0.05	-0.02	-0.02	0.02
				0.05	-0.02	-0.02	0.02
				0.05	0.12	0.12	0.09
				0.05	0.01	0.01	0.03
				0.05	0.12	0.12	0.09
				0.05	0.01	0.01	0.03
				0.05	0.01	0.01	0.03
				0.05	0.12	0.12	0.09
				0.05	0.01	0.01	0.03
				0.05	0.12	0.12	0.07
				0.05	0.01	0.01	0.03
				0.05	0.12	0.12	0.09
				0.05	0.12	0.12	0.07
				0.05	0.01	0.01	0.03
				0.05	0.12	0.12	0.09
				0.05	-0.01	-0.08	-0.13
				0.05	-0.01	-0.08	-0.13
				0.05	-0.01	-0.08	-0.13
				0.05	-0.01	-0.08	-0.13
				0.05	-0.01	-0.08	-0.13
				0.05	0.13	0.1	0.06
				0.05	0.13	0.1	0.06
				0.05	0.13	0.1	0.06
				0.05	0.13	0.1	0.06
				0.05	0.13	0.1	0.06
				0.05	0.13	0.1	0.06
				0.05	0.13	0.1	0.06
				0.05	0.02	0.02	0.05
				0.05	0.02	0.02	0.05
				0.05	0.02	0.02	0.05
				0.05	0.02	0.02	0.05
				0.05	0.02	0.02	0.05
				0.05	0.02	0.02	0.05
				0.05	0.12	0.12	0.09
				0.05	0.12	0.12	0.09
				0.05	0.12	0.12	0.09
				0.05	0.12	0.12	0.09
				0.06	0.03	-0.01	-0.15
				0.06	0.07	0.05	-0.01
				0.06	0.07	0.05	-0.01
				0.06	0.03	-0.01	-0.15
				0.06	0.07	0.05	-0.01
				0.06	0.03	-0.01	-0.15
				0.06	0.07	0.05	-0.01
				0.06	0.04	0.03	0.04
				0.06	0.07	0.05	-0.01
				0.06	0.07	0.05	-0.01
				0.06	0.07	0.05	-0.01
				0.06	0.07	0.05	-0.01
				0.06	0.07	0.05	-0.01
				0.06	0.07	0.05	-0.01
				0.06	0.07	0.07	0.06
				0.06	0.07	0.07	0.06
				0.06	0.07	0.07	0.06
				0.06	0.07	0.05	-0.01
				0.06	0.06	0.03	0.02
				0.06	0.07	0.05	-0.01
				0.06	0.07	0.05	-0.01
				0.06	0.06	0.03	0.02
				0.06	0.07	0.05	-0.01
				0.06	0.07	0.05	-0.01
				0.06	0.07	0.05	-0.01
				0.06	0.07	0.05	-0.01
				0.06	0.07	0.05	-0.01
				0.06	0.07	0.05	-0.01
				0.06	0.07	0.05	-0.01
				0.06	0.07	0.05	-0.01
				0.06	0.13	0.09	0.04
				0.06	0.03	-0.01	-0.15
				0.06	0.13	0.09	0.04
				0.06	0.03	-0.01	-0.15
				0.06	0.03	-0.01	-0.15
				0.06	0.13	0.09	0.04
				0.06	0.03	-0.01	-0.15
				0.06	0.13	0.09	0.04
				0.06	0.13	0.09	0.04
				0.06	0.03	-0.01	-0.15
				0.06	0.13	0.09	0.04
				0.06	0.03	-0.01	-0.15
				0.06	0.16	0.15	0.13
				0.06	0.16	0.15	0.13
				0.06	0.16	0.15	0.13
				0.06	0.16	0.15	0.13
				0.06	0.16	0.15	0.13
				0.06	0.16	0.15	0.13
				0.06	0.07	0.05	-0.01
				0.06	0.06	0.03	0.02
				0.06	0.07	0.05	-0.01
				0.06	0.06	0.03	0.02
				0.06	0.06	0.03	0.02
				0.06	0.07	0.05	-0.01
				0.06	0.06	0.03	0.02
				0.06	0.07	0.05	-0.01
				0.06	0.07	0.05	-0.01
				0.06	0.06	0.03	0.02
				0.06	0.07	0.05	-0.01
				0.06	0.06	0.03	0.02
				0.06	0.07	0.05	-0.01
				0.06	0.06	0.03	0.02
				0.06	0.07	0.05	-0.01
				0.06	0.06	0.03	0.02
				0.06	0.06	0.03	0.02
				0.06	0.07	0.05	-0.01
				0.06	0.06	0.03	0.02
				0.06	0.07	0.05	-0.01
				0.06	0.07	0.05	-0.01
				0.06	0.07	0.05	-0.01
				0.06	0.06	0.03	0.02
				0.06	-0.01	-0.02	0
				0.06	0.01	0	0.03
				0.06	-0.01	-0.02	0
				0.06	0.01	0	0.03
				0.06	-0.01	-0.02	0
				0.06	0.01	0	0.03
				0.06	-0.01	-0.02	0
				0.06	0.01	0	0.03
				0.07	0.1	0.09	0.09
				0.07	0.15	0.09	0.03
				0.07	0.15	0.09	0.03
				0.07	0.15	0.09	0.03
				0.07	0.15	0.09	0.03
				0.07	0.15	0.09	0.03
				0.07	0.15	0.09	0.03
				0.07	0.1	0.09	0.09
				0.07	0.1	0.09	0.09
				0.07	0.1	0.09	0.09
				0.07	0.1	0.09	0.09
				0.07	0.1	0.09	0.09
				0.07	0.1	0.09	0.09
				0.07	0.06	0.05	0.07
				0.07	0.06	0.05	0.07
				0.07	0.06	0.05	0.07
				0.07	0.06	0.05	0.07
				0.07	0.06	0.05	0.07
				0.07	0.06	0.05	0.07
				0.07	0.06	0.05	0.07
				0.07	0.06	0.05	0.07
				0.07	0.06	0.05	0.07
				0.07	0.06	0.05	0.07
				0.07	0.06	0.05	0.07
				0.07	0.06	0.05	0.07
				0.07	0.1	0.09	0.09
				0.07	0.1	0.09	0.09
				0.07	0.1	0.09	0.09
				0.07	0.1	0.09	0.09
				0.07	0.1	0.09	0.09
				0.07	0.1	0.09	0.09
				0.07	0.05	0.01	0.05
				0.07	0.05	0.01	0.05
				0.07	0.05	0.01	0.05
				0.07	0.05	0.01	0.05
				0.07	0.05	0.01	0.05
				0.08	0.07	0.04	0.05
				0.08	0.07	0.04	0.05
				0.08	0.07	0.04	0.05
				0.08	0.07	0.04	0.05
				0.08	0.07	0.04	0.05
				0.08	0.07	0.04	0.05
				0.08	0.08	0.07	0.06
				0.08	0.08	0.07	0.06
				0.08	0.08	0.07	0.06
				0.08	0.08	0.07	0.06
				0.08	0.08	0.07	0.06
				0.08	0.08	0.07	0.06
				0.08	0.14	0.11	0.02
				0.08	0.14	0.11	0.02
				0.08	0.14	0.11	0.02
				0.08	0.14	0.11	0.02
				0.08	0.06	0.05	0.02
				0.08	0.06	0.05	0.02
				0.08	0.06	0.05	0.02
				0.08	0.06	0.05	0.02
				0.08	0.06	0.05	0.02
				0.08	0.06	0.05	0.02
				0.08	0.1	0.09	0.08
				0.08	0.1	0.09	0.08
				0.08	0.1	0.09	0.08
				0.11	0.3	0.29	0.21
				0.11	0.3	0.29	0.21
				0.12	0.34	0.33	0.24
				0.12	0.34	0.33	0.24
				0.12	0.34	0.33	0.24
				0.12	0.34	0.33	0.24
				0.12	0.34	0.33	0.24
				0.12	0.34	0.33	0.24
				0.12	0.34	0.33	0.24
				0.12	0.33	0.31	0.14
				0.12	0.33	0.31	0.14
				0.12	0.34	0.33	0.24
				0.12	0.33	0.31	0.14
				0.12	0.33	0.31	0.14
				0.12	0.34	0.33	0.24
				0.12	0.33	0.31	0.14
				0.12	0.33	0.31	0.14
				0.12	0.34	0.33	0.24
				0.12	0.33	0.31	0.14
				0.12	0.34	0.33	0.24
				0.12	0.34	0.33	0.24
				0.12	0.33	0.31	0.14
				0.13	0.35	0.34	0.24
				0.13	0.35	0.34	0.24
				0.13	0.35	0.34	0.24
				0.13	0.35	0.34	0.24
				0.13	0.35	0.34	0.24
				0.13	0.35	0.34	0.24
				0.14	0.1	0.08	0.06
				0.14	0.1	0.08	0.06
				0.14	0.1	0.08	0.06
				0.14	0.1	0.08	0.06
				0.14	0.1	0.08	0.06
				0.14	0.1	0.08	0.06
				0.15	0.12	0.1	0.09
				0.15	0.12	0.1	0.09
				0.15	0.12	0.1	0.09
				0.15	0.12	0.1	0.09
				0.15	0.12	0.1	0.09
				0.15	0.12	0.1	0.09
				0.16	0.05	0	-0.07
				0.17	0.07	0.07	0.06
				0.17	0.07	0.07	0.06
				0.17	0.07	0.07	0.06
				0.17	0.07	0.07	0.06
				0.17	0.07	0.07	0.06
				0.17	0.07	0.07	0.06
				0.18	0.07	0.08	0.18
				0.18	0.07	0.08	0.18
				0.18	0.07	0.08	0.18
				0.18	0.07	0.08	0.18
				0.18	0.07	0.08	0.18
				0.18	0.07	0.08	0.18
				0.18	0.07	0.08	0.18
				0.18	0.07	0.08	0.18
				0.18	0.07	0.08	0.18
				0.18	0.07	0.08	0.18
				0.18	0.07	0.08	0.18
				0.18	0.07	0.08	0.18
				0.36	0.17	0.16	0.26
				0.37	0.3	0.29	0.24
				0.37	0.3	0.29	0.24
				0.37	0.3	0.29	0.24
				0.37	0.3	0.29	0.24
				0.37	0.3	0.29	0.24
				0.37	0.3	0.29	0.24
				0.44	0.22	0.18	0.21
				0.44	0.22	0.18	0.21
				0.44	0.22	0.18	0.21
				0.44	0.22	0.18	0.21
				0.44	0.22	0.18	0.21
				0.44	0.22	0.18	0.21
				0.44	0.22	0.18	0.21
				0.44	0.22	0.18	0.21
				0.44	0.22	0.18	0.21
				0.44	0.22	0.18	0.21
				0.44	0.22	0.18	0.21
				0.44	0.22	0.18	0.21
				0.44	0.22	0.18	0.21
				0.44	0.22	0.18	0.21
				0.44	0.22	0.18	0.21
				0.44	0.22	0.18	0.21
				0.44	0.22	0.18	0.21
				0.44	0.22	0.18	0.21
				0.46	0.27	0.2	0.13
				0.46	0.27	0.2	0.13
				0.46	0.27	0.2	0.13
				0.46	0.27	0.2	0.13
				0.46	0.27	0.2	0.13
				0.46	0.27	0.2	0.13
				0.46	0.27	0.2	0.13
				0.46	0.27	0.2	0.13
				0.46	0.27	0.2	0.13
				0.46	0.27	0.2	0.13
				0.46	0.27	0.2	0.13
				0.47	0.3	0.24	0.23
				0.47	0.3	0.24	0.23
				0.47	0.3	0.24	0.23
				0.47	0.3	0.24	0.23
				0.47	0.3	0.24	0.23
				0.47	0.3	0.24	0.23
				0.47	0.3	0.24	0.23
				0.47	0.3	0.24	0.23
				0.47	0.3	0.24	0.23
				0.47	0.3	0.24	0.23
				0.47	0.3	0.24	0.23
				0.47	0.3	0.24	0.23
				0.47	0.3	0.24	0.23
				0.47	0.3	0.24	0.23
				0.47	0.3	0.24	0.23
				0.47	0.3	0.24	0.23
				0.47	0.3	0.24	0.23
				0.47	0.3	0.24	0.23
				0.47	0.3	0.24	0.23
				0.47	0.3	0.24	0.23
				0.47	0.3	0.24	0.23
				0.47	0.3	0.24	0.23
				0.47	0.3	0.24	0.23
				0.47	0.3	0.24	0.23
				0.47	0.3	0.24	0.23
				0.47	0.3	0.24	0.23
				0.47	0.3	0.24	0.23
				0.47	0.3	0.24	0.23
				0.47	0.3	0.24	0.23
				0.47	0.3	0.24	0.23
				0.47	0.3	0.24	0.23
				0.47	0.3	0.24	0.23
				0.47	0.3	0.24	0.23
				0.47	0.3	0.24	0.23
				0.47	0.3	0.24	0.23
				0.47	0.3	0.24	0.23
				0.48	0.31	0.25	0.25
				0.48	0.31	0.25	0.25
				0.48	0.31	0.25	0.25
				0.48	0.31	0.25	0.25
				0.48	0.31	0.25	0.25
				0.48	0.31	0.25	0.25
				0.48	0.31	0.25	0.25
				0.48	0.31	0.25	0.25
				0.48	0.31	0.25	0.25
				0.48	0.31	0.25	0.25
				0.48	0.31	0.25	0.25
				0.48	0.31	0.25	0.25
				0.49	0.31	0.25	0.23
				0.49	0.31	0.25	0.23
				0.49	0.3	0.24	0.21
				0.49	0.3	0.24	0.21
				0.49	0.31	0.25	0.23
				0.49	0.3	0.24	0.21
				0.49	0.31	0.25	0.23
				0.49	0.31	0.25	0.23
				0.49	0.3	0.24	0.21
				0.49	0.31	0.25	0.23
				0.49	0.3	0.24	0.21
				0.49	0.29	0.23	0.22
				0.49	0.29	0.23	0.22
				0.49	0.29	0.23	0.22
				0.49	0.31	0.25	0.23
				0.49	0.29	0.23	0.22
				0.49	0.29	0.23	0.22
				0.49	0.31	0.25	0.23
				0.49	0.29	0.23	0.22
				0.49	0.29	0.23	0.22
				0.49	0.31	0.25	0.23
				0.49	0.29	0.23	0.22
				0.49	0.29	0.23	0.22
				0.49	0.29	0.23	0.22
				0.49	0.31	0.25	0.23
				0.49	0.29	0.23	0.22
				0.49	0.29	0.23	0.22
				0.49	0.31	0.25	0.23
				0.49	0.31	0.25	0.23
				0.49	0.31	0.25	0.23
				0.49	0.31	0.25	0.23
				0.49	0.31	0.25	0.23
				0.49	0.31	0.25	0.23
				0.49	0.31	0.25	0.23
				0.49	0.31	0.25	0.23
				0.49	0.31	0.25	0.23
				0.49	0.31	0.25	0.23
				0.49	0.31	0.25	0.23
				0.49	0.31	0.25	0.23
				0.49	0.31	0.25	0.23
				0.49	0.31	0.25	0.23
				0.49	0.31	0.25	0.23
				0.49	0.31	0.25	0.23
				0.49	0.31	0.25	0.23
				0.49	0.31	0.25	0.23
				0.49	0.31	0.25	0.23
				0.49	0.3	0.24	0.21
				0.49	0.3	0.24	0.21
				0.49	0.3	0.24	0.21
				0.49	0.3	0.24	0.21
				0.49	0.3	0.24	0.21
				0.49	0.3	0.24	0.21
				0.49	0.3	0.24	0.21
				0.49	0.3	0.24	0.21
				0.49	0.3	0.24	0.21
				0.49	0.3	0.24	0.21
				0.49	0.3	0.24	0.21
				0.49	0.3	0.24	0.21
				0.86	0.63	0.55	0.76
				0.86	0.63	0.55	0.76
				0.9	0.61	0.52	0.74
				0.9	0.61	0.52	0.74

## Sheet: Main questionnaire PAR (1)
									SLOF							SAOF							SMOF							LRA
Conclusion:	[ , >		PAR	Q	P	ANSWER	left (name)	right (name)	CORRECT	Δ	SI left (z-val scaled)	SI right (z-val scaled)	score coeff.	possible MAX score (SUM)	score % (by SUM)	CORRECT	Δ	SI left (z-val scaled)	SI right (z-val scaled)	score coeff.	possible MAX score (SUM)	score % (by SUM)	CORRECT	Δ	SI left (z-val scaled)	SI right (z-val scaled)	score coeff.	possible MAX score (SUM)	score % (by SUM)	CORRECT	Δ	SI left (z-val scaled)	SI right (z-val scaled)	score coeff.	possible MAX score (SUM)	score % (by SUM)		SUM	SLOF score	SAOF score	SMOF score	LRA score
Δ 1	100 - 10		PAR 1	Q 1	1	Right friend	anonymized	anonymized	Left friend	36	45	9	-0.36	0.36	0	Left friend	17	21	4	-0.17	0.17	0	Left friend	16	19	3	-0.16	0.16	0	Left friend	26	29	3	-0.26	0.26	0		Q1	-0.27	-0.66	-0.73	-0.59
Δ 2	10 - 5				2	Left friend	anonymized	anonymized	Right friend	7	9	16	-0.07	0.07	0	Right friend	10	4	14	-0.1	0.1	0	Right friend	9	3	12	-0.09	0.09	0	Right friend	9	3	12	-0.09	0.09	0		Q2	0.27	-0.22	-0.23	0.25
Δ 3	5 - 0				3	Left friend	anonymized	anonymized	Left friend	3	15	12	0.03	0.03	1	Left friend	5	21	16	0.05	0.05	1	Left friend	3	19	16	0.03	0.03	1	Left friend	4	16	12	0.04	0.04	1		Q3	-0.59	-0.48	-0.39	0.11
					4	Left friend	anonymized	anonymized	Right friend	6	9	15	-0.06	0.06	0	Right friend	17	4	21	-0.17	0.17	0	Right friend	16	3	19	-0.16	0.16	0	Right friend	13	3	16	-0.13	0.13	0		Q4	-0.59	-0.48	-0.39	0.11
					5	Right friend	anonymized	anonymized	Left friend	1	12	11	-0.01	0.01	0	Left friend	7	16	9	-0.07	0.07	0	Left friend	5	16	11	-0.05	0.05	0	Right friend	6	12	18	0.06	0.06	1		Q5	-0.61	-0.62	-0.59	-0.37
					6	Left friend	anonymized	anonymized	Right friend	6	10	16	-0.06	0.06	0	Right friend	3	11	14	-0.03	0.03	0	Left friend	1	13	12	0.01	0.01	1	Left friend	15	27	12	0.15	0.15	1		Q6	-0.61	-0.62	-0.59	-0.37
					7	Right friend	anonymized	anonymized	Left friend	2	11	9	-0.02	0.02	0	Left friend	11	15	4	-0.11	0.11	0	Left friend	19	22	3	-0.19	0.19	0	Left friend	15	18	3	-0.15	0.15	0		AVG	-0.4	-0.513333	-0.486667	-0.143333
					8	Right friend	anonymized	anonymized	Right friend	18	27	45	0.18	0.18	1	Right friend	7	14	21	0.07	0.07	1	Right friend	8	11	19	0.08	0.08	1	Right friend	18	11	29	0.18	0.18	1		SUM	-2.4	-3.08	-2.92	-0.86
					9	Right friend	anonymized	anonymized	Left friend	6	16	10	-0.06	0.06	0	Left friend	4	14	10	-0.04	0.04	0	Left friend	3	12	9	-0.03	0.03	0	Left friend	4	12	8	-0.04	0.04	0		%	0.305825	0.243333	0.249141	0.450575
					10	Left friend	anonymized	anonymized	Right friend	1	9	10	-0.01	0.01	0	Right friend	7	4	11	-0.07	0.07	0	Right friend	10	3	13	-0.1	0.1	0	Right friend	24	3	27	-0.24	0.24	0
					11	Left friend	anonymized	anonymized	Left friend	16	27	11	0.16	0.16	1	Left friend	5	14	9	0.05	0.05	1	Right friend	0	11	11	0	0	0	Right friend	7	11	18	-0.07	0.07	0
					12	Left friend	anonymized	anonymized	Left friend	1	16	15	0.01	0.01	1	Right friend	7	14	21	-0.07	0.07	0	Right friend	7	12	19	-0.07	0.07	0	Right friend	4	12	16	-0.04	0.04	0
				Q 2	3	Left friend	anonymized	anonymized	Left friend	3	15	12	0.03	0.03	1	Left friend	5	21	16	0.05	0.05	1	Left friend	3	19	16	0.03	0.03	1	Left friend	4	16	12	0.04	0.04	1
					2	Right friend	anonymized	anonymized	Right friend	7	9	16	0.07	0.07	1	Right friend	10	4	14	0.1	0.1	1	Right friend	9	3	12	0.09	0.09	1	Right friend	9	3	12	0.09	0.09	1
					1	Left friend	anonymized	anonymized	Left friend	36	45	9	0.36	0.36	1	Left friend	17	21	4	0.17	0.17	1	Left friend	16	19	3	0.16	0.16	1	Left friend	26	29	3	0.26	0.26	1
					6	Left friend	anonymized	anonymized	Right friend	6	10	16	-0.06	0.06	0	Right friend	3	11	14	-0.03	0.03	0	Left friend	1	13	12	0.01	0.01	1	Left friend	15	27	12	0.15	0.15	1
					5	Right friend	anonymized	anonymized	Left friend	1	12	11	-0.01	0.01	0	Left friend	7	16	9	-0.07	0.07	0	Left friend	5	16	11	-0.05	0.05	0	Right friend	6	12	18	0.06	0.06	1
					4	Left friend	anonymized	anonymized	Right friend	6	9	15	-0.06	0.06	0	Right friend	17	4	21	-0.17	0.17	0	Right friend	16	3	19	-0.16	0.16	0	Right friend	13	3	16	-0.13	0.13	0
					9	Right friend	anonymized	anonymized	Left friend	6	16	10	-0.06	0.06	0	Left friend	4	14	10	-0.04	0.04	0	Left friend	3	12	9	-0.03	0.03	0	Left friend	4	12	8	-0.04	0.04	0
					8	Right friend	anonymized	anonymized	Right friend	18	27	45	0.18	0.18	1	Right friend	7	14	21	0.07	0.07	1	Right friend	8	11	19	0.08	0.08	1	Right friend	18	11	29	0.18	0.18	1
					7	Right friend	anonymized	anonymized	Left friend	2	11	9	-0.02	0.02	0	Left friend	11	15	4	-0.11	0.11	0	Left friend	19	22	3	-0.19	0.19	0	Left friend	15	18	3	-0.15	0.15	0
					12	Left friend	anonymized	anonymized	Left friend	1	16	15	0.01	0.01	1	Right friend	7	14	21	-0.07	0.07	0	Right friend	7	12	19	-0.07	0.07	0	Right friend	4	12	16	-0.04	0.04	0			SLOF score	SAOF score	SMOF score	LRA score
					11	Right friend	anonymized	anonymized	Left friend	16	27	11	-0.16	0.16	0	Left friend	5	14	9	-0.05	0.05	0	Right friend	0	11	11	0	0	0	Right friend	7	11	18	0.07	0.07	1		%
					10	Left friend	anonymized	anonymized	Right friend	1	9	10	-0.01	0.01	0	Right friend	7	4	11	-0.07	0.07	0	Right friend	10	3	13	-0.1	0.1	0	Right friend	24	3	27	-0.24	0.24	0		Q1	0.333333	0.25	0.25	0.333333
				Q 3	12	Right friend	anonymized	anonymized	Left friend	1	16	15	-0.01	0.01	0	Right friend	7	14	21	0.07	0.07	1	Right friend	7	12	19	0.07	0.07	1	Right friend	4	12	16	0.04	0.04	1		Q2	0.416667	0.333333	0.416667	0.583333
					11	Right friend	anonymized	anonymized	Left friend	16	27	11	-0.16	0.16	0	Left friend	5	14	9	-0.05	0.05	0	Right friend	0	11	11	0	0	0	Right friend	7	11	18	0.07	0.07	1		Q3	0.25	0.333333	0.416667	0.583333
					10	Right friend	anonymized	anonymized	Right friend	1	9	10	0.01	0.01	1	Right friend	7	4	11	0.07	0.07	1	Right friend	10	3	13	0.1	0.1	1	Right friend	24	3	27	0.24	0.24	1		Q4	0.25	0.333333	0.416667	0.583333
					9	Right friend	anonymized	anonymized	Left friend	6	16	10	-0.06	0.06	0	Left friend	4	14	10	-0.04	0.04	0	Left friend	3	12	9	-0.03	0.03	0	Left friend	4	12	8	-0.04	0.04	0		Q5	0.166667	0.25	0.333333	0.5
					8	Right friend	anonymized	anonymized	Right friend	18	27	45	0.18	0.18	1	Right friend	7	14	21	0.07	0.07	1	Right friend	8	11	19	0.08	0.08	1	Right friend	18	11	29	0.18	0.18	1		Q6	0.166667	0.25	0.333333	0.5
					7	Right friend	anonymized	anonymized	Left friend	2	11	9	-0.02	0.02	0	Left friend	11	15	4	-0.11	0.11	0	Left friend	19	22	3	-0.19	0.19	0	Left friend	15	18	3	-0.15	0.15	0		AVG	0.263889	0.291667	0.361111	0.513889
					6	Left friend	anonymized	anonymized	Right friend	6	10	16	-0.06	0.06	0	Right friend	3	11	14	-0.03	0.03	0	Left friend	1	13	12	0.01	0.01	1	Left friend	15	27	12	0.15	0.15	1
					5	Right friend	anonymized	anonymized	Left friend	1	12	11	-0.01	0.01	0	Left friend	7	16	9	-0.07	0.07	0	Left friend	5	16	11	-0.05	0.05	0	Right friend	6	12	18	0.06	0.06	1
					4	Left friend	anonymized	anonymized	Right friend	6	9	15	-0.06	0.06	0	Right friend	17	4	21	-0.17	0.17	0	Right friend	16	3	19	-0.16	0.16	0	Right friend	13	3	16	-0.13	0.13	0
					3	Left friend	anonymized	anonymized	Left friend	3	15	12	0.03	0.03	1	Left friend	5	21	16	0.05	0.05	1	Left friend	3	19	16	0.03	0.03	1	Left friend	4	16	12	0.04	0.04	1
					2	Left friend	anonymized	anonymized	Right friend	7	9	16	-0.07	0.07	0	Right friend	10	4	14	-0.1	0.1	0	Right friend	9	3	12	-0.09	0.09	0	Right friend	9	3	12	-0.09	0.09	0
					1	Right friend	anonymized	anonymized	Left friend	36	45	9	-0.36	0.36	0	Left friend	17	21	4	-0.17	0.17	0	Left friend	16	19	3	-0.16	0.16	0	Left friend	26	29	3	-0.26	0.26	0
				Q 4	10	Right friend	anonymized	anonymized	Right friend	1	9	10	0.01	0.01	1	Right friend	7	4	11	0.07	0.07	1	Right friend	10	3	13	0.1	0.1	1	Right friend	24	3	27	0.24	0.24	1
					11	Right friend	anonymized	anonymized	Left friend	16	27	11	-0.16	0.16	0	Left friend	5	14	9	-0.05	0.05	0	Right friend	0	11	11	0	0	0	Right friend	7	11	18	0.07	0.07	1
					12	Right friend	anonymized	anonymized	Left friend	1	16	15	-0.01	0.01	0	Right friend	7	14	21	0.07	0.07	1	Right friend	7	12	19	0.07	0.07	1	Right friend	4	12	16	0.04	0.04	1
					7	Right friend	anonymized	anonymized	Left friend	2	11	9	-0.02	0.02	0	Left friend	11	15	4	-0.11	0.11	0	Left friend	19	22	3	-0.19	0.19	0	Left friend	15	18	3	-0.15	0.15	0
					8	Right friend	anonymized	anonymized	Right friend	18	27	45	0.18	0.18	1	Right friend	7	14	21	0.07	0.07	1	Right friend	8	11	19	0.08	0.08	1	Right friend	18	11	29	0.18	0.18	1
					9	Right friend	anonymized	anonymized	Left friend	6	16	10	-0.06	0.06	0	Left friend	4	14	10	-0.04	0.04	0	Left friend	3	12	9	-0.03	0.03	0	Left friend	4	12	8	-0.04	0.04	0
					4	Left friend	anonymized	anonymized	Right friend	6	9	15	-0.06	0.06	0	Right friend	17	4	21	-0.17	0.17	0	Right friend	16	3	19	-0.16	0.16	0	Right friend	13	3	16	-0.13	0.13	0
					5	Right friend	anonymized	anonymized	Left friend	1	12	11	-0.01	0.01	0	Left friend	7	16	9	-0.07	0.07	0	Left friend	5	16	11	-0.05	0.05	0	Right friend	6	12	18	0.06	0.06	1
					6	Left friend	anonymized	anonymized	Right friend	6	10	16	-0.06	0.06	0	Right friend	3	11	14	-0.03	0.03	0	Left friend	1	13	12	0.01	0.01	1	Left friend	15	27	12	0.15	0.15	1
					1	Right friend	anonymized	anonymized	Left friend	36	45	9	-0.36	0.36	0	Left friend	17	21	4	-0.17	0.17	0	Left friend	16	19	3	-0.16	0.16	0	Left friend	26	29	3	-0.26	0.26	0
					2	Left friend	anonymized	anonymized	Right friend	7	9	16	-0.07	0.07	0	Right friend	10	4	14	-0.1	0.1	0	Right friend	9	3	12	-0.09	0.09	0	Right friend	9	3	12	-0.09	0.09	0
					3	Left friend	anonymized	anonymized	Left friend	3	15	12	0.03	0.03	1	Left friend	5	21	16	0.05	0.05	1	Left friend	3	19	16	0.03	0.03	1	Left friend	4	16	12	0.04	0.04	1
				Q 5	7	Right friend	anonymized	anonymized	Left friend	2	11	9	-0.02	0.02	0	Left friend	11	15	4	-0.11	0.11	0	Left friend	19	22	3	-0.19	0.19	0	Left friend	15	18	3	-0.15	0.15	0
					8	Right friend	anonymized	anonymized	Right friend	18	27	45	0.18	0.18	1	Right friend	7	14	21	0.07	0.07	1	Right friend	8	11	19	0.08	0.08	1	Right friend	18	11	29	0.18	0.18	1
					9	Right friend	anonymized	anonymized	Left friend	6	16	10	-0.06	0.06	0	Left friend	4	14	10	-0.04	0.04	0	Left friend	3	12	9	-0.03	0.03	0	Left friend	4	12	8	-0.04	0.04	0
					10	Left friend	anonymized	anonymized	Right friend	1	9	10	-0.01	0.01	0	Right friend	7	4	11	-0.07	0.07	0	Right friend	10	3	13	-0.1	0.1	0	Right friend	24	3	27	-0.24	0.24	0
					11	Right friend	anonymized	anonymized	Left friend	16	27	11	-0.16	0.16	0	Left friend	5	14	9	-0.05	0.05	0	Right friend	0	11	11	0	0	0	Right friend	7	11	18	0.07	0.07	1
					12	Right friend	anonymized	anonymized	Left friend	1	16	15	-0.01	0.01	0	Right friend	7	14	21	0.07	0.07	1	Right friend	7	12	19	0.07	0.07	1	Right friend	4	12	16	0.04	0.04	1
					1	Right friend	anonymized	anonymized	Left friend	36	45	9	-0.36	0.36	0	Left friend	17	21	4	-0.17	0.17	0	Left friend	16	19	3	-0.16	0.16	0	Left friend	26	29	3	-0.26	0.26	0
					2	Left friend	anonymized	anonymized	Right friend	7	9	16	-0.07	0.07	0	Right friend	10	4	14	-0.1	0.1	0	Right friend	9	3	12	-0.09	0.09	0	Right friend	9	3	12	-0.09	0.09	0
					3	Left friend	anonymized	anonymized	Left friend	3	15	12	0.03	0.03	1	Left friend	5	21	16	0.05	0.05	1	Left friend	3	19	16	0.03	0.03	1	Left friend	4	16	12	0.04	0.04	1
					4	Left friend	anonymized	anonymized	Right friend	6	9	15	-0.06	0.06	0	Right friend	17	4	21	-0.17	0.17	0	Right friend	16	3	19	-0.16	0.16	0	Right friend	13	3	16	-0.13	0.13	0
					5	Right friend	anonymized	anonymized	Left friend	1	12	11	-0.01	0.01	0	Left friend	7	16	9	-0.07	0.07	0	Left friend	5	16	11	-0.05	0.05	0	Right friend	6	12	18	0.06	0.06	1
					6	Left friend	anonymized	anonymized	Right friend	6	10	16	-0.06	0.06	0	Right friend	3	11	14	-0.03	0.03	0	Left friend	1	13	12	0.01	0.01	1	Left friend	15	27	12	0.15	0.15	1
				Q 6	9	Right friend	anonymized	anonymized	Left friend	6	16	10	-0.06	0.06	0	Left friend	4	14	10	-0.04	0.04	0	Left friend	3	12	9	-0.03	0.03	0	Left friend	4	12	8	-0.04	0.04	0
					8	Right friend	anonymized	anonymized	Right friend	18	27	45	0.18	0.18	1	Right friend	7	14	21	0.07	0.07	1	Right friend	8	11	19	0.08	0.08	1	Right friend	18	11	29	0.18	0.18	1
					7	Right friend	anonymized	anonymized	Left friend	2	11	9	-0.02	0.02	0	Left friend	11	15	4	-0.11	0.11	0	Left friend	19	22	3	-0.19	0.19	0	Left friend	15	18	3	-0.15	0.15	0
					12	Right friend	anonymized	anonymized	Left friend	1	16	15	-0.01	0.01	0	Right friend	7	14	21	0.07	0.07	1	Right friend	7	12	19	0.07	0.07	1	Right friend	4	12	16	0.04	0.04	1
					11	Right friend	anonymized	anonymized	Left friend	16	27	11	-0.16	0.16	0	Left friend	5	14	9	-0.05	0.05	0	Right friend	0	11	11	0	0	0	Right friend	7	11	18	0.07	0.07	1
					10	Left friend	anonymized	anonymized	Right friend	1	9	10	-0.01	0.01	0	Right friend	7	4	11	-0.07	0.07	0	Right friend	10	3	13	-0.1	0.1	0	Right friend	24	3	27	-0.24	0.24	0
					3	Left friend	anonymized	anonymized	Left friend	3	15	12	0.03	0.03	1	Left friend	5	21	16	0.05	0.05	1	Left friend	3	19	16	0.03	0.03	1	Left friend	4	16	12	0.04	0.04	1
					2	Left friend	anonymized	anonymized	Right friend	7	9	16	-0.07	0.07	0	Right friend	10	4	14	-0.1	0.1	0	Right friend	9	3	12	-0.09	0.09	0	Right friend	9	3	12	-0.09	0.09	0
					1	Right friend	anonymized	anonymized	Left friend	36	45	9	-0.36	0.36	0	Left friend	17	21	4	-0.17	0.17	0	Left friend	16	19	3	-0.16	0.16	0	Left friend	26	29	3	-0.26	0.26	0
					6	Left friend	anonymized	anonymized	Right friend	6	10	16	-0.06	0.06	0	Right friend	3	11	14	-0.03	0.03	0	Left friend	1	13	12	0.01	0.01	1	Left friend	15	27	12	0.15	0.15	1
					5	Right friend	anonymized	anonymized	Left friend	1	12	11	-0.01	0.01	0	Left friend	7	16	9	-0.07	0.07	0	Left friend	5	16	11	-0.05	0.05	0	Right friend	6	12	18	0.06	0.06	1
					4	Left friend	anonymized	anonymized	Right friend	6	9	15	-0.06	0.06	0	Right friend	17	4	21	-0.17	0.17	0	Right friend	16	3	19	-0.16	0.16	0	Right friend	13	3	16	-0.13	0.13	0
														6.18							6							5.82							8.7

## Sheet: Main questionnaire PAR (2)
									SLOF							SAOF							SMOF							LRA
Conclusion:	[ , >		PAR	Q	P	ANSWER	left (name)	right (name)	CORRECT	Δ	SI left (z-val scaled)	SI right (z-val scaled)	score coeff.	possible MAX score (SUM)	score % (by SUM)	CORRECT	Δ	SI left (z-val scaled)	SI right (z-val scaled)	score coeff.	possible MAX score (SUM)	score % (by SUM)	CORRECT	Δ	SI left (z-val scaled)	SI right (z-val scaled)	score coeff.	possible MAX score (SUM)	score % (by SUM)	CORRECT	Δ	SI left (z-val scaled)	SI right (z-val scaled)	score coeff.	possible MAX score (SUM)	score % (by SUM)		SUM	SLOF score	SAOF score	SMOF score	LRA score
Δ 1	100 - 10		PAR 1	Q 1	1	Left friend	anonymized	anonymized	Left friend	13	20	7	0.13	0.13	1	Left friend	35	38	3	0.35	0.35	1	Left friend	34	36	2	0.34	0.34	1	Left friend	24	26	2	0.24	0.24	1		Q1	0.77	1.77	1.6	1.1
Δ 2	10 - 5				2	Right friend	anonymized	anonymized	Right friend	7	10	17	0.07	0.07	1	Right friend	15	11	26	0.15	0.15	1	Right friend	9	15	24	0.09	0.09	1	Right friend	3	15	18	0.03	0.03	1		Q2	0.77	1.77	1.6	1.1
Δ 3	5 - 0				3	Right friend	anonymized	anonymized	Right friend	4	13	17	0.04	0.04	1	Right friend	4	22	26	0.04	0.04	1	Right friend	2	22	24	0.02	0.02	1	Right friend	2	16	18	0.02	0.02	1		Q3	0.07	-0.19	-0.3	-0.28
					4	Right friend	anonymized	anonymized	Right friend	12	8	20	0.12	0.12	1	Right friend	34	4	38	0.34	0.34	1	Right friend	33	3	36	0.33	0.33	1	Right friend	24	2	26	0.24	0.24	1		Q4	0.07	-0.19	-0.3	-0.28
					5	Left friend	anonymized	anonymized	Left friend	8	16	8	0.08	0.08	1	Left friend	7	14	7	0.07	0.07	1	Left friend	4	12	8	0.04	0.04	1	Left friend	5	12	7	0.05	0.05	1		Q5	0.07	-0.19	-0.3	-0.28
					6	Right friend	anonymized	anonymized	Right friend	1	9	10	0.01	0.01	1	Right friend	2	8	10	0.02	0.02	1	Right friend	2	7	9	0.02	0.02	1	Right friend	3	5	8	0.03	0.03	1		Q6	0.55	1.17	1.02	0.68
					7	Left friend	anonymized	anonymized	Left friend	12	20	8	0.12	0.12	1	Left friend	34	38	4	0.34	0.34	1	Left friend	33	36	3	0.33	0.33	1	Left friend	24	26	2	0.24	0.24	1		AVG	0.383333	0.69	0.553333	0.34
					8	Left friend	anonymized	anonymized	Left friend	1	17	16	0.01	0.01	1	Left friend	7	19	12	0.07	0.07	1	Left friend	7	17	10	0.07	0.07	1	Left friend	4	13	9	0.04	0.04	1		SUM	2.3	4.14	3.32	2.04
					9	Left friend	anonymized	anonymized	Right friend	0	8	8	0	0	0	Left friend	2	7	5	0.02	0.02	1	Left friend	3	8	5	0.03	0.03	1	Left friend	2	8	6	0.02	0.02	1		%	0.748918	0.678756	0.652015	0.641667
					10	Right friend	anonymized	anonymized	Right friend	11	9	20	0.11	0.11	1	Right friend	30	8	38	0.3	0.3	1	Right friend	29	7	36	0.29	0.29	1	Right friend	21	5	26	0.21	0.21	1
					11	Left friend	anonymized	anonymized	Left friend	3	16	13	0.03	0.03	1	Right friend	8	14	22	-0.08	0.08	0	Right friend	11	12	23	-0.11	0.11	0	Right friend	5	12	17	-0.05	0.05	0
					12	Left friend	anonymized	anonymized	Left friend	5	13	8	0.05	0.05	1	Left friend	15	22	7	0.15	0.15	1	Left friend	15	23	8	0.15	0.15	1	Left friend	3	17	14	0.03	0.03	1
				Q 2	3	Right friend	anonymized	anonymized	Right friend	4	13	17	0.04	0.04	1	Right friend	4	22	26	0.04	0.04	1	Right friend	2	22	24	0.02	0.02	1	Right friend	2	16	18	0.02	0.02	1
					2	Right friend	anonymized	anonymized	Right friend	7	10	17	0.07	0.07	1	Right friend	15	11	26	0.15	0.15	1	Right friend	9	15	24	0.09	0.09	1	Right friend	3	15	18	0.03	0.03	1
					1	Left friend	anonymized	anonymized	Left friend	13	20	7	0.13	0.13	1	Left friend	35	38	3	0.35	0.35	1	Left friend	34	36	2	0.34	0.34	1	Left friend	24	26	2	0.24	0.24	1
					6	Right friend	anonymized	anonymized	Right friend	1	9	10	0.01	0.01	1	Right friend	2	8	10	0.02	0.02	1	Right friend	2	7	9	0.02	0.02	1	Right friend	3	5	8	0.03	0.03	1
					5	Left friend	anonymized	anonymized	Left friend	8	16	8	0.08	0.08	1	Left friend	7	14	7	0.07	0.07	1	Left friend	4	12	8	0.04	0.04	1	Left friend	5	12	7	0.05	0.05	1
					4	Right friend	anonymized	anonymized	Right friend	12	8	20	0.12	0.12	1	Right friend	34	4	38	0.34	0.34	1	Right friend	33	3	36	0.33	0.33	1	Right friend	24	2	26	0.24	0.24	1
					9	Left friend	anonymized	anonymized	Right friend	0	8	8	0	0	0	Left friend	2	7	5	0.02	0.02	1	Left friend	3	8	5	0.03	0.03	1	Left friend	2	8	6	0.02	0.02	1
					8	Left friend	anonymized	anonymized	Left friend	1	17	16	0.01	0.01	1	Left friend	7	19	12	0.07	0.07	1	Left friend	7	17	10	0.07	0.07	1	Left friend	4	13	9	0.04	0.04	1
					7	Left friend	anonymized	anonymized	Left friend	12	20	8	0.12	0.12	1	Left friend	34	38	4	0.34	0.34	1	Left friend	33	36	3	0.33	0.33	1	Left friend	24	26	2	0.24	0.24	1
					12	Left friend	anonymized	anonymized	Left friend	5	13	8	0.05	0.05	1	Left friend	15	22	7	0.15	0.15	1	Left friend	15	23	8	0.15	0.15	1	Left friend	3	17	14	0.03	0.03	1			SLOF score	SAOF score	SMOF score	LRA score
					11	Left friend	anonymized	anonymized	Left friend	3	16	13	0.03	0.03	1	Right friend	8	14	22	-0.08	0.08	0	Right friend	11	12	23	-0.11	0.11	0	Right friend	5	12	17	-0.05	0.05	0		%
					10	Right friend	anonymized	anonymized	Right friend	11	9	20	0.11	0.11	1	Right friend	30	8	38	0.3	0.3	1	Right friend	29	7	36	0.29	0.29	1	Right friend	21	5	26	0.21	0.21	1		Q1	0.916667	0.916667	0.916667	0.916667
				Q 3	12	Left friend	anonymized	anonymized	Left friend	5	13	8	0.05	0.05	1	Left friend	15	22	7	0.15	0.15	1	Left friend	15	23	8	0.15	0.15	1	Left friend	3	17	14	0.03	0.03	1		Q2	0.916667	0.916667	0.916667	0.916667
					11	Left friend	anonymized	anonymized	Left friend	3	16	13	0.03	0.03	1	Right friend	8	14	22	-0.08	0.08	0	Right friend	11	12	23	-0.11	0.11	0	Right friend	5	12	17	-0.05	0.05	0		Q3	0.666667	0.666667	0.666667	0.666667
					10	Left friend	anonymized	anonymized	Right friend	11	9	20	-0.11	0.11	0	Right friend	30	8	38	-0.3	0.3	0	Right friend	29	7	36	-0.29	0.29	0	Right friend	21	5	26	-0.21	0.21	0		Q4	0.666667	0.666667	0.666667	0.666667
					9	Left friend	anonymized	anonymized	Right friend	0	8	8	0	0	0	Left friend	2	7	5	0.02	0.02	1	Left friend	3	8	5	0.03	0.03	1	Left friend	2	8	6	0.02	0.02	1		Q5	0.666667	0.666667	0.666667	0.666667
					8	Left friend	anonymized	anonymized	Left friend	1	17	16	0.01	0.01	1	Left friend	7	19	12	0.07	0.07	1	Left friend	7	17	10	0.07	0.07	1	Left friend	4	13	9	0.04	0.04	1		Q6	0.833333	0.833333	0.833333	0.833333
					7	Right friend	anonymized	anonymized	Left friend	12	20	8	-0.12	0.12	0	Left friend	34	38	4	-0.34	0.34	0	Left friend	33	36	3	-0.33	0.33	0	Left friend	24	26	2	-0.24	0.24	0		AVG	0.777778	0.777778	0.777778	0.777778
					6	Right friend	anonymized	anonymized	Right friend	1	9	10	0.01	0.01	1	Right friend	2	8	10	0.02	0.02	1	Right friend	2	7	9	0.02	0.02	1	Right friend	3	5	8	0.03	0.03	1
					5	Left friend	anonymized	anonymized	Left friend	8	16	8	0.08	0.08	1	Left friend	7	14	7	0.07	0.07	1	Left friend	4	12	8	0.04	0.04	1	Left friend	5	12	7	0.05	0.05	1
					4	Left friend	anonymized	anonymized	Right friend	12	8	20	-0.12	0.12	0	Right friend	34	4	38	-0.34	0.34	0	Right friend	33	3	36	-0.33	0.33	0	Right friend	24	2	26	-0.24	0.24	0
					3	Right friend	anonymized	anonymized	Right friend	4	13	17	0.04	0.04	1	Right friend	4	22	26	0.04	0.04	1	Right friend	2	22	24	0.02	0.02	1	Right friend	2	16	18	0.02	0.02	1
					2	Right friend	anonymized	anonymized	Right friend	7	10	17	0.07	0.07	1	Right friend	15	11	26	0.15	0.15	1	Right friend	9	15	24	0.09	0.09	1	Right friend	3	15	18	0.03	0.03	1
					1	Left friend	anonymized	anonymized	Left friend	13	20	7	0.13	0.13	1	Left friend	35	38	3	0.35	0.35	1	Left friend	34	36	2	0.34	0.34	1	Left friend	24	26	2	0.24	0.24	1
				Q 4	10	Left friend	anonymized	anonymized	Right friend	11	9	20	-0.11	0.11	0	Right friend	30	8	38	-0.3	0.3	0	Right friend	29	7	36	-0.29	0.29	0	Right friend	21	5	26	-0.21	0.21	0
					11	Left friend	anonymized	anonymized	Left friend	3	16	13	0.03	0.03	1	Right friend	8	14	22	-0.08	0.08	0	Right friend	11	12	23	-0.11	0.11	0	Right friend	5	12	17	-0.05	0.05	0
					12	Left friend	anonymized	anonymized	Left friend	5	13	8	0.05	0.05	1	Left friend	15	22	7	0.15	0.15	1	Left friend	15	23	8	0.15	0.15	1	Left friend	3	17	14	0.03	0.03	1
					7	Right friend	anonymized	anonymized	Left friend	12	20	8	-0.12	0.12	0	Left friend	34	38	4	-0.34	0.34	0	Left friend	33	36	3	-0.33	0.33	0	Left friend	24	26	2	-0.24	0.24	0
					8	Left friend	anonymized	anonymized	Left friend	1	17	16	0.01	0.01	1	Left friend	7	19	12	0.07	0.07	1	Left friend	7	17	10	0.07	0.07	1	Left friend	4	13	9	0.04	0.04	1
					9	Left friend	anonymized	anonymized	Right friend	0	8	8	0	0	0	Left friend	2	7	5	0.02	0.02	1	Left friend	3	8	5	0.03	0.03	1	Left friend	2	8	6	0.02	0.02	1
					4	Left friend	anonymized	anonymized	Right friend	12	8	20	-0.12	0.12	0	Right friend	34	4	38	-0.34	0.34	0	Right friend	33	3	36	-0.33	0.33	0	Right friend	24	2	26	-0.24	0.24	0
					5	Left friend	anonymized	anonymized	Left friend	8	16	8	0.08	0.08	1	Left friend	7	14	7	0.07	0.07	1	Left friend	4	12	8	0.04	0.04	1	Left friend	5	12	7	0.05	0.05	1
					6	Right friend	anonymized	anonymized	Right friend	1	9	10	0.01	0.01	1	Right friend	2	8	10	0.02	0.02	1	Right friend	2	7	9	0.02	0.02	1	Right friend	3	5	8	0.03	0.03	1
					1	Left friend	anonymized	anonymized	Left friend	13	20	7	0.13	0.13	1	Left friend	35	38	3	0.35	0.35	1	Left friend	34	36	2	0.34	0.34	1	Left friend	24	26	2	0.24	0.24	1
					2	Right friend	anonymized	anonymized	Right friend	7	10	17	0.07	0.07	1	Right friend	15	11	26	0.15	0.15	1	Right friend	9	15	24	0.09	0.09	1	Right friend	3	15	18	0.03	0.03	1
					3	Right friend	anonymized	anonymized	Right friend	4	13	17	0.04	0.04	1	Right friend	4	22	26	0.04	0.04	1	Right friend	2	22	24	0.02	0.02	1	Right friend	2	16	18	0.02	0.02	1
				Q 5	7	Right friend	anonymized	anonymized	Left friend	12	20	8	-0.12	0.12	0	Left friend	34	38	4	-0.34	0.34	0	Left friend	33	36	3	-0.33	0.33	0	Left friend	24	26	2	-0.24	0.24	0
					8	Left friend	anonymized	anonymized	Left friend	1	17	16	0.01	0.01	1	Left friend	7	19	12	0.07	0.07	1	Left friend	7	17	10	0.07	0.07	1	Left friend	4	13	9	0.04	0.04	1
					9	Left friend	anonymized	anonymized	Right friend	0	8	8	0	0	0	Left friend	2	7	5	0.02	0.02	1	Left friend	3	8	5	0.03	0.03	1	Left friend	2	8	6	0.02	0.02	1
					10	Left friend	anonymized	anonymized	Right friend	11	9	20	-0.11	0.11	0	Right friend	30	8	38	-0.3	0.3	0	Right friend	29	7	36	-0.29	0.29	0	Right friend	21	5	26	-0.21	0.21	0
					11	Left friend	anonymized	anonymized	Left friend	3	16	13	0.03	0.03	1	Right friend	8	14	22	-0.08	0.08	0	Right friend	11	12	23	-0.11	0.11	0	Right friend	5	12	17	-0.05	0.05	0
					12	Left friend	anonymized	anonymized	Left friend	5	13	8	0.05	0.05	1	Left friend	15	22	7	0.15	0.15	1	Left friend	15	23	8	0.15	0.15	1	Left friend	3	17	14	0.03	0.03	1
					1	Left friend	anonymized	anonymized	Left friend	13	20	7	0.13	0.13	1	Left friend	35	38	3	0.35	0.35	1	Left friend	34	36	2	0.34	0.34	1	Left friend	24	26	2	0.24	0.24	1
					2	Right friend	anonymized	anonymized	Right friend	7	10	17	0.07	0.07	1	Right friend	15	11	26	0.15	0.15	1	Right friend	9	15	24	0.09	0.09	1	Right friend	3	15	18	0.03	0.03	1
					3	Right friend	anonymized	anonymized	Right friend	4	13	17	0.04	0.04	1	Right friend	4	22	26	0.04	0.04	1	Right friend	2	22	24	0.02	0.02	1	Right friend	2	16	18	0.02	0.02	1
					4	Left friend	anonymized	anonymized	Right friend	12	8	20	-0.12	0.12	0	Right friend	34	4	38	-0.34	0.34	0	Right friend	33	3	36	-0.33	0.33	0	Right friend	24	2	26	-0.24	0.24	0
					5	Left friend	anonymized	anonymized	Left friend	8	16	8	0.08	0.08	1	Left friend	7	14	7	0.07	0.07	1	Left friend	4	12	8	0.04	0.04	1	Left friend	5	12	7	0.05	0.05	1
					6	Right friend	anonymized	anonymized	Right friend	1	9	10	0.01	0.01	1	Right friend	2	8	10	0.02	0.02	1	Right friend	2	7	9	0.02	0.02	1	Right friend	3	5	8	0.03	0.03	1
				Q 6	9	Left friend	anonymized	anonymized	Right friend	0	8	8	0	0	0	Left friend	2	7	5	0.02	0.02	1	Left friend	3	8	5	0.03	0.03	1	Left friend	2	8	6	0.02	0.02	1
					8	Left friend	anonymized	anonymized	Left friend	1	17	16	0.01	0.01	1	Left friend	7	19	12	0.07	0.07	1	Left friend	7	17	10	0.07	0.07	1	Left friend	4	13	9	0.04	0.04	1
					7	Left friend	anonymized	anonymized	Left friend	12	20	8	0.12	0.12	1	Left friend	34	38	4	0.34	0.34	1	Left friend	33	36	3	0.33	0.33	1	Left friend	24	26	2	0.24	0.24	1
					12	Left friend	anonymized	anonymized	Left friend	5	13	8	0.05	0.05	1	Left friend	15	22	7	0.15	0.15	1	Left friend	15	23	8	0.15	0.15	1	Left friend	3	17	14	0.03	0.03	1
					11	Left friend	anonymized	anonymized	Left friend	3	16	13	0.03	0.03	1	Right friend	8	14	22	-0.08	0.08	0	Right friend	11	12	23	-0.11	0.11	0	Right friend	5	12	17	-0.05	0.05	0
					10	Left friend	anonymized	anonymized	Right friend	11	9	20	-0.11	0.11	0	Right friend	30	8	38	-0.3	0.3	0	Right friend	29	7	36	-0.29	0.29	0	Right friend	21	5	26	-0.21	0.21	0
					3	Right friend	anonymized	anonymized	Right friend	4	13	17	0.04	0.04	1	Right friend	4	22	26	0.04	0.04	1	Right friend	2	22	24	0.02	0.02	1	Right friend	2	16	18	0.02	0.02	1
					2	Right friend	anonymized	anonymized	Right friend	7	10	17	0.07	0.07	1	Right friend	15	11	26	0.15	0.15	1	Right friend	9	15	24	0.09	0.09	1	Right friend	3	15	18	0.03	0.03	1
					1	Left friend	anonymized	anonymized	Left friend	13	20	7	0.13	0.13	1	Left friend	35	38	3	0.35	0.35	1	Left friend	34	36	2	0.34	0.34	1	Left friend	24	26	2	0.24	0.24	1
					6	Right friend	anonymized	anonymized	Right friend	1	9	10	0.01	0.01	1	Right friend	2	8	10	0.02	0.02	1	Right friend	2	7	9	0.02	0.02	1	Right friend	3	5	8	0.03	0.03	1
					5	Left friend	anonymized	anonymized	Left friend	8	16	8	0.08	0.08	1	Left friend	7	14	7	0.07	0.07	1	Left friend	4	12	8	0.04	0.04	1	Left friend	5	12	7	0.05	0.05	1
					4	Right friend	anonymized	anonymized	Right friend	12	8	20	0.12	0.12	1	Right friend	34	4	38	0.34	0.34	1	Right friend	33	3	36	0.33	0.33	1	Right friend	24	2	26	0.24	0.24	1
														4.62																					7.2

## Sheet: Main questionnaire PAR (3)
									SLOF							SAOF							SMOF							LRA
Conclusion:	[ , >		PAR	Q	P	ANSWER	left (name)	right (name)	CORRECT	Δ	SI left (z-val scaled)	SI right (z-val scaled)	score coeff.	possible MAX score (SUM)	score % (by SUM)	CORRECT	Δ	SI left (z-val scaled)	SI right (z-val scaled)	score coeff.	possible MAX score (SUM)	score % (by SUM)	CORRECT	Δ	SI left (z-val scaled)	SI right (z-val scaled)	score coeff.	possible MAX score (SUM)	score % (by SUM)	CORRECT	Δ	SI left (z-val scaled)	SI right (z-val scaled)	score coeff.	possible MAX score (SUM)	score % (by SUM)		SUM	SLOF score	SAOF score	SMOF score	LRA score
Δ 1	100 - 10		PAR 1	Q 1	1	Left friend	anonymized	anonymized	Left friend	49	56	7	0.49	0.49	1	Left friend	31	34	3	0.31	0.31	1	Left friend	25	27	2	0.25	0.25	1	Left friend	23	26	3	0.23	0.23	1		Q1	0.08	0.28	0.32	0.55
Δ 2	10 - 5				2	Left friend	anonymized	anonymized	Right friend	6	10	16	-0.06	0.06	0	Right friend	3	11	14	-0.03	0.03	0	Left friend	1	13	12	0.01	0.01	1	Left friend	15	27	12	0.15	0.15	1		Q2	1.14	0.82	0.64	0.59
Δ 3	5 - 0				3	Left friend	anonymized	anonymized	Left friend	2	11	9	0.02	0.02	1	Left friend	1	10	9	0.01	0.01	1	Right friend	0	11	11	0	0	0	Right friend	4	14	18	-0.04	0.04	0		Q3	1.14	0.9	0.76	0.93
					4	Left friend	anonymized	anonymized	Right friend	49	7	56	-0.49	0.49	0	Right friend	30	4	34	-0.3	0.3	0	Right friend	24	3	27	-0.24	0.24	0	Right friend	21	5	26	-0.21	0.21	0		Q4	1.14	0.9	0.76	0.87
					5	Right friend	anonymized	anonymized	Left friend	6	16	10	-0.06	0.06	0	Left friend	7	14	7	-0.07	0.07	0	Left friend	5	12	7	-0.05	0.05	0	Right friend	1	12	13	0.01	0.01	1		Q5	1.26	0.96	0.74	0.63
					6	Right friend	anonymized	anonymized	Right friend	0	10	10	0	0	0	Right friend	3	7	10	0.03	0.03	1	Right friend	2	7	9	0.02	0.02	1	Left friend	5	13	8	-0.05	0.05	0		Q6	1.24	0.96	0.78	0.49
					7	Left friend	anonymized	anonymized	Left friend	37	44	7	0.37	0.37	1	Left friend	30	33	3	0.3	0.3	1	Left friend	29	31	2	0.29	0.29	1	Left friend	24	27	3	0.24	0.24	1		AVG	1	0.803333	0.666667	0.676667
					8	Right friend	anonymized	anonymized	Right friend	2	10	12	0.02	0.02	1	Right friend	6	10	16	0.06	0.06	1	Right friend	7	9	16	0.07	0.07	1	Right friend	4	8	12	0.04	0.04	1		SUM	6	4.82	4	4.06
					9	Right friend	anonymized	anonymized	Right friend	1	10	11	0.01	0.01	1	Right friend	0	10	10	0	0	0	Left friend	2	13	11	-0.02	0.02	0	Right friend	4	10	14	0.04	0.04	1		%	0.777778	0.808974	0.782486	0.750617
					10	Right friend	anonymized	anonymized	Right friend	3	7	10	0.03	0.03	1	Right friend	8	3	11	0.08	0.08	1	Right friend	11	2	13	0.11	0.11	1	Right friend	24	3	27	0.24	0.24	1
					11	Left friend	anonymized	anonymized	Right friend	25	19	44	-0.25	0.25	0	Right friend	11	22	33	-0.11	0.11	0	Right friend	12	19	31	-0.12	0.12	0	Right friend	7	20	27	-0.07	0.07	0
					12	Right friend	anonymized	anonymized	Right friend	0	7	7	0	0	0	Right friend	0	4	4	0	0	0	Right friend	0	3	3	0	0	0	Left friend	3	8	5	-0.03	0.03	0
				Q 2	3	Left friend	anonymized	anonymized	Left friend	2	11	9	0.02	0.02	1	Left friend	1	10	9	0.01	0.01	1	Right friend	0	11	11	0	0	0	Right friend	4	14	18	-0.04	0.04	0
					2	Right friend	anonymized	anonymized	Right friend	6	10	16	0.06	0.06	1	Right friend	3	11	14	0.03	0.03	1	Left friend	1	13	12	-0.01	0.01	0	Left friend	15	27	12	-0.15	0.15	0
					1	Left friend	anonymized	anonymized	Left friend	49	56	7	0.49	0.49	1	Left friend	31	34	3	0.31	0.31	1	Left friend	25	27	2	0.25	0.25	1	Left friend	23	26	3	0.23	0.23	1
					6	Right friend	anonymized	anonymized	Right friend	0	10	10	0	0	0	Right friend	3	7	10	0.03	0.03	1	Right friend	2	7	9	0.02	0.02	1	Left friend	5	13	8	-0.05	0.05	0
					5	Right friend	anonymized	anonymized	Left friend	6	16	10	-0.06	0.06	0	Left friend	7	14	7	-0.07	0.07	0	Left friend	5	12	7	-0.05	0.05	0	Right friend	1	12	13	0.01	0.01	1
					4	Right friend	anonymized	anonymized	Right friend	49	7	56	0.49	0.49	1	Right friend	30	4	34	0.3	0.3	1	Right friend	24	3	27	0.24	0.24	1	Right friend	21	5	26	0.21	0.21	1
					9	Right friend	anonymized	anonymized	Right friend	1	10	11	0.01	0.01	1	Right friend	0	10	10	0	0	0	Left friend	2	13	11	-0.02	0.02	0	Right friend	4	10	14	0.04	0.04	1
					8	Left friend	anonymized	anonymized	Right friend	2	10	12	-0.02	0.02	0	Right friend	6	10	16	-0.06	0.06	0	Right friend	7	9	16	-0.07	0.07	0	Right friend	4	8	12	-0.04	0.04	0
					7	Left friend	anonymized	anonymized	Left friend	37	44	7	0.37	0.37	1	Left friend	30	33	3	0.3	0.3	1	Left friend	29	31	2	0.29	0.29	1	Left friend	24	27	3	0.24	0.24	1
					12	Right friend	anonymized	anonymized	Right friend	0	7	7	0	0	0	Right friend	0	4	4	0	0	0	Right friend	0	3	3	0	0	0	Left friend	3	8	5	-0.03	0.03	0			SLOF score	SAOF score	SMOF score	LRA score
					11	Left friend	anonymized	anonymized	Right friend	25	19	44	-0.25	0.25	0	Right friend	11	22	33	-0.11	0.11	0	Right friend	12	19	31	-0.12	0.12	0	Right friend	7	20	27	-0.07	0.07	0		%
					10	Right friend	anonymized	anonymized	Right friend	3	7	10	0.03	0.03	1	Right friend	8	3	11	0.08	0.08	1	Right friend	11	2	13	0.11	0.11	1	Right friend	24	3	27	0.24	0.24	1		Q1	0.5	0.5	0.5	0.583333
				Q 3	12	Left friend	anonymized	anonymized	Right friend	0	7	7	0	0	0	Right friend	0	4	4	0	0	0	Right friend	0	3	3	0	0	0	Left friend	3	8	5	0.03	0.03	1		Q2	0.583333	0.583333	0.416667	0.5
					11	Left friend	anonymized	anonymized	Right friend	25	19	44	-0.25	0.25	0	Right friend	11	22	33	-0.11	0.11	0	Right friend	12	19	31	-0.12	0.12	0	Right friend	7	20	27	-0.07	0.07	0		Q3	0.583333	0.583333	0.583333	0.583333
					10	Right friend	anonymized	anonymized	Right friend	3	7	10	0.03	0.03	1	Right friend	8	3	11	0.08	0.08	1	Right friend	11	2	13	0.11	0.11	1	Right friend	24	3	27	0.24	0.24	1		Q4	0.583333	0.583333	0.583333	0.5
					9	Right friend	anonymized	anonymized	Right friend	1	10	11	0.01	0.01	1	Right friend	0	10	10	0	0	0	Left friend	2	13	11	-0.02	0.02	0	Right friend	4	10	14	0.04	0.04	1		Q5	0.666667	0.666667	0.5	0.5
					8	Left friend	anonymized	anonymized	Right friend	2	10	12	-0.02	0.02	0	Right friend	6	10	16	-0.06	0.06	0	Right friend	7	9	16	-0.07	0.07	0	Right friend	4	8	12	-0.04	0.04	0		Q6	0.583333	0.666667	0.583333	0.333333
					7	Left friend	anonymized	anonymized	Left friend	37	44	7	0.37	0.37	1	Left friend	30	33	3	0.3	0.3	1	Left friend	29	31	2	0.29	0.29	1	Left friend	24	27	3	0.24	0.24	1		AVG	0.583333	0.597222	0.527778	0.5
					6	Right friend	anonymized	anonymized	Right friend	0	10	10	0	0	0	Right friend	3	7	10	0.03	0.03	1	Right friend	2	7	9	0.02	0.02	1	Left friend	5	13	8	-0.05	0.05	0
					5	Left friend	anonymized	anonymized	Left friend	6	16	10	0.06	0.06	1	Left friend	7	14	7	0.07	0.07	1	Left friend	5	12	7	0.05	0.05	1	Right friend	1	12	13	-0.01	0.01	0
					4	Right friend	anonymized	anonymized	Right friend	49	7	56	0.49	0.49	1	Right friend	30	4	34	0.3	0.3	1	Right friend	24	3	27	0.24	0.24	1	Right friend	21	5	26	0.21	0.21	1
					3	Left friend	anonymized	anonymized	Left friend	2	11	9	0.02	0.02	1	Left friend	1	10	9	0.01	0.01	1	Right friend	0	11	11	0	0	0	Right friend	4	14	18	-0.04	0.04	0
					2	Left friend	anonymized	anonymized	Right friend	6	10	16	-0.06	0.06	0	Right friend	3	11	14	-0.03	0.03	0	Left friend	1	13	12	0.01	0.01	1	Left friend	15	27	12	0.15	0.15	1
					1	Left friend	anonymized	anonymized	Left friend	49	56	7	0.49	0.49	1	Left friend	31	34	3	0.31	0.31	1	Left friend	25	27	2	0.25	0.25	1	Left friend	23	26	3	0.23	0.23	1
				Q 4	10	Right friend	anonymized	anonymized	Right friend	3	7	10	0.03	0.03	1	Right friend	8	3	11	0.08	0.08	1	Right friend	11	2	13	0.11	0.11	1	Right friend	24	3	27	0.24	0.24	1
					11	Left friend	anonymized	anonymized	Right friend	25	19	44	-0.25	0.25	0	Right friend	11	22	33	-0.11	0.11	0	Right friend	12	19	31	-0.12	0.12	0	Right friend	7	20	27	-0.07	0.07	0
					12	Right friend	anonymized	anonymized	Right friend	0	7	7	0	0	0	Right friend	0	4	4	0	0	0	Right friend	0	3	3	0	0	0	Left friend	3	8	5	-0.03	0.03	0
					7	Left friend	anonymized	anonymized	Left friend	37	44	7	0.37	0.37	1	Left friend	30	33	3	0.3	0.3	1	Left friend	29	31	2	0.29	0.29	1	Left friend	24	27	3	0.24	0.24	1
					8	Left friend	anonymized	anonymized	Right friend	2	10	12	-0.02	0.02	0	Right friend	6	10	16	-0.06	0.06	0	Right friend	7	9	16	-0.07	0.07	0	Right friend	4	8	12	-0.04	0.04	0
					9	Right friend	anonymized	anonymized	Right friend	1	10	11	0.01	0.01	1	Right friend	0	10	10	0	0	0	Left friend	2	13	11	-0.02	0.02	0	Right friend	4	10	14	0.04	0.04	1
					4	Right friend	anonymized	anonymized	Right friend	49	7	56	0.49	0.49	1	Right friend	30	4	34	0.3	0.3	1	Right friend	24	3	27	0.24	0.24	1	Right friend	21	5	26	0.21	0.21	1
					5	Left friend	anonymized	anonymized	Left friend	6	16	10	0.06	0.06	1	Left friend	7	14	7	0.07	0.07	1	Left friend	5	12	7	0.05	0.05	1	Right friend	1	12	13	-0.01	0.01	0
					6	Right friend	anonymized	anonymized	Right friend	0	10	10	0	0	0	Right friend	3	7	10	0.03	0.03	1	Right friend	2	7	9	0.02	0.02	1	Left friend	5	13	8	-0.05	0.05	0
					1	Left friend	anonymized	anonymized	Left friend	49	56	7	0.49	0.49	1	Left friend	31	34	3	0.31	0.31	1	Left friend	25	27	2	0.25	0.25	1	Left friend	23	26	3	0.23	0.23	1
					2	Left friend	anonymized	anonymized	Right friend	6	10	16	-0.06	0.06	0	Right friend	3	11	14	-0.03	0.03	0	Left friend	1	13	12	0.01	0.01	1	Left friend	15	27	12	0.15	0.15	1
					3	Left friend	anonymized	anonymized	Left friend	2	11	9	0.02	0.02	1	Left friend	1	10	9	0.01	0.01	1	Right friend	0	11	11	0	0	0	Right friend	4	14	18	-0.04	0.04	0
				Q 5	7	Left friend	anonymized	anonymized	Left friend	37	44	7	0.37	0.37	1	Left friend	30	33	3	0.3	0.3	1	Left friend	29	31	2	0.29	0.29	1	Left friend	24	27	3	0.24	0.24	1
					8	Left friend	anonymized	anonymized	Right friend	2	10	12	-0.02	0.02	0	Right friend	6	10	16	-0.06	0.06	0	Right friend	7	9	16	-0.07	0.07	0	Right friend	4	8	12	-0.04	0.04	0
					9	Right friend	anonymized	anonymized	Right friend	1	10	11	0.01	0.01	1	Right friend	0	10	10	0	0	0	Left friend	2	13	11	-0.02	0.02	0	Right friend	4	10	14	0.04	0.04	1
					10	Right friend	anonymized	anonymized	Right friend	3	7	10	0.03	0.03	1	Right friend	8	3	11	0.08	0.08	1	Right friend	11	2	13	0.11	0.11	1	Right friend	24	3	27	0.24	0.24	1
					11	Left friend	anonymized	anonymized	Right friend	25	19	44	-0.25	0.25	0	Right friend	11	22	33	-0.11	0.11	0	Right friend	12	19	31	-0.12	0.12	0	Right friend	7	20	27	-0.07	0.07	0
					12	Left friend	anonymized	anonymized	Right friend	0	7	7	0	0	0	Right friend	0	4	4	0	0	0	Right friend	0	3	3	0	0	0	Left friend	3	8	5	0.03	0.03	1
					1	Left friend	anonymized	anonymized	Left friend	49	56	7	0.49	0.49	1	Left friend	31	34	3	0.31	0.31	1	Left friend	25	27	2	0.25	0.25	1	Left friend	23	26	3	0.23	0.23	1
					2	Right friend	anonymized	anonymized	Right friend	6	10	16	0.06	0.06	1	Right friend	3	11	14	0.03	0.03	1	Left friend	1	13	12	-0.01	0.01	0	Left friend	15	27	12	-0.15	0.15	0
					3	Left friend	anonymized	anonymized	Left friend	2	11	9	0.02	0.02	1	Left friend	1	10	9	0.01	0.01	1	Right friend	0	11	11	0	0	0	Right friend	4	14	18	-0.04	0.04	0
					4	Right friend	anonymized	anonymized	Right friend	49	7	56	0.49	0.49	1	Right friend	30	4	34	0.3	0.3	1	Right friend	24	3	27	0.24	0.24	1	Right friend	21	5	26	0.21	0.21	1
					5	Left friend	anonymized	anonymized	Left friend	6	16	10	0.06	0.06	1	Left friend	7	14	7	0.07	0.07	1	Left friend	5	12	7	0.05	0.05	1	Right friend	1	12	13	-0.01	0.01	0
					6	Right friend	anonymized	anonymized	Right friend	0	10	10	0	0	0	Right friend	3	7	10	0.03	0.03	1	Right friend	2	7	9	0.02	0.02	1	Left friend	5	13	8	-0.05	0.05	0
				Q 6	9	Left friend	anonymized	anonymized	Right friend	1	10	11	-0.01	0.01	0	Right friend	0	10	10	0	0	0	Left friend	2	13	11	0.02	0.02	1	Right friend	4	10	14	-0.04	0.04	0
					8	Left friend	anonymized	anonymized	Right friend	2	10	12	-0.02	0.02	0	Right friend	6	10	16	-0.06	0.06	0	Right friend	7	9	16	-0.07	0.07	0	Right friend	4	8	12	-0.04	0.04	0
					7	Left friend	anonymized	anonymized	Left friend	37	44	7	0.37	0.37	1	Left friend	30	33	3	0.3	0.3	1	Left friend	29	31	2	0.29	0.29	1	Left friend	24	27	3	0.24	0.24	1
					12	Right friend	anonymized	anonymized	Right friend	0	7	7	0	0	0	Right friend	0	4	4	0	0	0	Right friend	0	3	3	0	0	0	Left friend	3	8	5	-0.03	0.03	0
					11	Left friend	anonymized	anonymized	Right friend	25	19	44	-0.25	0.25	0	Right friend	11	22	33	-0.11	0.11	0	Right friend	12	19	31	-0.12	0.12	0	Right friend	7	20	27	-0.07	0.07	0
					10	Right friend	anonymized	anonymized	Right friend	3	7	10	0.03	0.03	1	Right friend	8	3	11	0.08	0.08	1	Right friend	11	2	13	0.11	0.11	1	Right friend	24	3	27	0.24	0.24	1
					3	Left friend	anonymized	anonymized	Left friend	2	11	9	0.02	0.02	1	Left friend	1	10	9	0.01	0.01	1	Right friend	0	11	11	0	0	0	Right friend	4	14	18	-0.04	0.04	0
					2	Right friend	anonymized	anonymized	Right friend	6	10	16	0.06	0.06	1	Right friend	3	11	14	0.03	0.03	1	Left friend	1	13	12	-0.01	0.01	0	Left friend	15	27	12	-0.15	0.15	0
					1	Left friend	anonymized	anonymized	Left friend	49	56	7	0.49	0.49	1	Left friend	31	34	3	0.31	0.31	1	Left friend	25	27	2	0.25	0.25	1	Left friend	23	26	3	0.23	0.23	1
					6	Right friend	anonymized	anonymized	Right friend	0	10	10	0	0	0	Right friend	3	7	10	0.03	0.03	1	Right friend	2	7	9	0.02	0.02	1	Left friend	5	13	8	-0.05	0.05	0
					5	Left friend	anonymized	anonymized	Left friend	6	16	10	0.06	0.06	1	Left friend	7	14	7	0.07	0.07	1	Left friend	5	12	7	0.05	0.05	1	Right friend	1	12	13	-0.01	0.01	0
					4	Right friend	anonymized	anonymized	Right friend	49	7	56	0.49	0.49	1	Right friend	30	4	34	0.3	0.3	1	Right friend	24	3	27	0.24	0.24	1	Right friend	21	5	26	0.21	0.21	1
														10.8																					8.1

## Sheet: Main questionnaire PAR (4)
									SLOF							SAOF							SMOF							LRA
Conclusion:	[ , >		PAR	Q	P	ANSWER	left (name)	right (name)	CORRECT	Δ	SI left (z-val scaled)	SI right (z-val scaled)	score coeff.	possible MAX score (SUM)	score % (by SUM)	CORRECT	Δ	SI left (z-val scaled)	SI right (z-val scaled)	score coeff.	possible MAX score (SUM)	score % (by SUM)	CORRECT	Δ	SI left (z-val scaled)	SI right (z-val scaled)	score coeff.	possible MAX score (SUM)	score % (by SUM)	CORRECT	Δ	SI left (z-val scaled)	SI right (z-val scaled)	score coeff.	possible MAX score (SUM)	score % (by SUM)		SUM	SLOF score	SAOF score	SMOF score	LRA score
Δ 1	100 - 10		PAR 1	Q 1	1	Right friend	anonymized	anonymized	Right friend	49	7	56	0.49	0.49	1	Right friend	29	5	34	0.29	0.29	1	Right friend	23	4	27	0.23	0.23	1	Right friend	22	4	26	0.22	0.22	1		Q1	0.21	0.27	0.27	0.5
Δ 2	10 - 5				2	Left friend	anonymized	anonymized	Right friend	6	10	16	-0.06	0.06	0	Right friend	4	10	14	-0.04	0.04	0	Right friend	3	9	12	-0.03	0.03	0	Right friend	4	8	12	-0.04	0.04	0		Q2	1.31	0.97	0.83	1.04
Δ 3	5 - 0				3	Right friend	anonymized	anonymized	Right friend	2	8	10	0.02	0.02	1	Right friend	2	6	8	0.02	0.02	1	Right friend	4	5	9	0.04	0.04	1	Right friend	4	6	10	0.04	0.04	1		Q3	1.19	0.89	0.77	0.96
					4	Right friend	anonymized	anonymized	Left friend	49	56	7	-0.49	0.49	0	Left friend	31	34	3	-0.31	0.31	0	Left friend	25	27	2	-0.25	0.25	0	Left friend	23	26	3	-0.23	0.23	0		Q4	1.19	0.89	0.77	0.96
					5	Left friend	anonymized	anonymized	Left friend	8	16	8	0.08	0.08	1	Left friend	8	14	6	0.08	0.08	1	Left friend	7	12	5	0.07	0.07	1	Left friend	6	12	6	0.06	0.06	1		Q5	1.19	0.89	0.77	0.96
					6	Left friend	anonymized	anonymized	Right friend	0	10	10	0	0	0	Right friend	2	8	10	-0.02	0.02	0	Right friend	0	9	9	0	0	0	Left friend	2	10	8	0.02	0.02	1		Q6	1.19	0.89	0.77	0.96
					7	Left friend	anonymized	anonymized	Left friend	49	56	7	0.49	0.49	1	Left friend	29	34	5	0.29	0.29	1	Left friend	23	27	4	0.23	0.23	1	Left friend	22	26	4	0.22	0.22	1		AVG	1.04667	0.8	0.696667	0.896667
					8	Left friend	anonymized	anonymized	Left friend	3	10	7	0.03	0.03	1	Left friend	7	10	3	0.07	0.07	1	Left friend	7	9	2	0.07	0.07	1	Left friend	5	8	3	0.05	0.05	1		SUM	6.28	4.8	4.18	5.38
					9	Left friend	anonymized	anonymized	Right friend	0	10	10	0	0	0	Right friend	1	10	11	-0.01	0.01	0	Right friend	2	13	15	-0.02	0.02	0	Right friend	5	10	15	-0.05	0.05	0		%	0.752818	0.78777	0.783198	0.85582
					10	Right friend	anonymized	anonymized	Right friend	3	7	10	0.03	0.03	1	Right friend	8	3	11	0.08	0.08	1	Right friend	11	2	13	0.11	0.11	1	Right friend	24	3	27	0.24	0.24	1
					11	Left friend	anonymized	anonymized	Right friend	37	19	56	-0.37	0.37	0	Right friend	12	22	34	-0.12	0.12	0	Right friend	8	19	27	-0.08	0.08	0	Right friend	6	20	26	-0.06	0.06	0
					12	Left friend	anonymized	anonymized	Right friend	1	10	11	-0.01	0.01	0	Right friend	6	11	17	-0.06	0.06	0	Right friend	10	13	23	-0.1	0.1	0	Left friend	3	27	24	0.03	0.03	1
				Q 2	3	Right friend	anonymized	anonymized	Right friend	2	8	10	0.02	0.02	1	Right friend	2	6	8	0.02	0.02	1	Right friend	4	5	9	0.04	0.04	1	Right friend	4	6	10	0.04	0.04	1
					2	Right friend	anonymized	anonymized	Right friend	6	10	16	0.06	0.06	1	Right friend	4	10	14	0.04	0.04	1	Right friend	3	9	12	0.03	0.03	1	Right friend	4	8	12	0.04	0.04	1
					1	Right friend	anonymized	anonymized	Right friend	49	7	56	0.49	0.49	1	Right friend	29	5	34	0.29	0.29	1	Right friend	23	4	27	0.23	0.23	1	Right friend	22	4	26	0.22	0.22	1
					6	Left friend	anonymized	anonymized	Right friend	0	10	10	0	0	0	Right friend	2	8	10	-0.02	0.02	0	Right friend	0	9	9	0	0	0	Left friend	2	10	8	0.02	0.02	1
					5	Left friend	anonymized	anonymized	Left friend	8	16	8	0.08	0.08	1	Left friend	8	14	6	0.08	0.08	1	Left friend	7	12	5	0.07	0.07	1	Left friend	6	12	6	0.06	0.06	1
					4	Left friend	anonymized	anonymized	Left friend	49	56	7	0.49	0.49	1	Left friend	31	34	3	0.31	0.31	1	Left friend	25	27	2	0.25	0.25	1	Left friend	23	26	3	0.23	0.23	1
					9	Left friend	anonymized	anonymized	Right friend	0	10	10	0	0	0	Right friend	1	10	11	-0.01	0.01	0	Right friend	2	13	15	-0.02	0.02	0	Right friend	5	10	15	-0.05	0.05	0
					8	Left friend	anonymized	anonymized	Left friend	3	10	7	0.03	0.03	1	Left friend	7	10	3	0.07	0.07	1	Left friend	7	9	2	0.07	0.07	1	Left friend	5	8	3	0.05	0.05	1
					7	Left friend	anonymized	anonymized	Left friend	49	56	7	0.49	0.49	1	Left friend	29	34	5	0.29	0.29	1	Left friend	23	27	4	0.23	0.23	1	Left friend	22	26	4	0.22	0.22	1
					12	Left friend	anonymized	anonymized	Right friend	1	10	11	-0.01	0.01	0	Right friend	6	11	17	-0.06	0.06	0	Right friend	10	13	23	-0.1	0.1	0	Left friend	3	27	24	0.03	0.03	1			SLOF score	SAOF score	SMOF score	LRA score
					11	Left friend	anonymized	anonymized	Right friend	37	19	56	-0.37	0.37	0	Right friend	12	22	34	-0.12	0.12	0	Right friend	8	19	27	-0.08	0.08	0	Right friend	6	20	26	-0.06	0.06	0		%
					10	Right friend	anonymized	anonymized	Right friend	3	7	10	0.03	0.03	1	Right friend	8	3	11	0.08	0.08	1	Right friend	11	2	13	0.11	0.11	1	Right friend	24	3	27	0.24	0.24	1		Q1	0.5	0.5	0.5	0.666667
				Q 3	12	Left friend	anonymized	anonymized	Right friend	1	10	11	-0.01	0.01	0	Right friend	6	11	17	-0.06	0.06	0	Right friend	10	13	23	-0.1	0.1	0	Left friend	3	27	24	0.03	0.03	1		Q2	0.666667	0.666667	0.666667	0.833333
					11	Left friend	anonymized	anonymized	Right friend	37	19	56	-0.37	0.37	0	Right friend	12	22	34	-0.12	0.12	0	Right friend	8	19	27	-0.08	0.08	0	Right friend	6	20	26	-0.06	0.06	0		Q3	0.583333	0.583333	0.583333	0.75
					10	Right friend	anonymized	anonymized	Right friend	3	7	10	0.03	0.03	1	Right friend	8	3	11	0.08	0.08	1	Right friend	11	2	13	0.11	0.11	1	Right friend	24	3	27	0.24	0.24	1		Q4	0.583333	0.583333	0.583333	0.75
					9	Left friend	anonymized	anonymized	Right friend	0	10	10	0	0	0	Right friend	1	10	11	-0.01	0.01	0	Right friend	2	13	15	-0.02	0.02	0	Right friend	5	10	15	-0.05	0.05	0		Q5	0.583333	0.583333	0.583333	0.75
					8	Left friend	anonymized	anonymized	Left friend	3	10	7	0.03	0.03	1	Left friend	7	10	3	0.07	0.07	1	Left friend	7	9	2	0.07	0.07	1	Left friend	5	8	3	0.05	0.05	1		Q6	0.583333	0.583333	0.583333	0.75
					7	Left friend	anonymized	anonymized	Left friend	49	56	7	0.49	0.49	1	Left friend	29	34	5	0.29	0.29	1	Left friend	23	27	4	0.23	0.23	1	Left friend	22	26	4	0.22	0.22	1		AVG	0.583333	0.583333	0.583333	0.75
					6	Left friend	anonymized	anonymized	Right friend	0	10	10	0	0	0	Right friend	2	8	10	-0.02	0.02	0	Right friend	0	9	9	0	0	0	Left friend	2	10	8	0.02	0.02	1
					5	Left friend	anonymized	anonymized	Left friend	8	16	8	0.08	0.08	1	Left friend	8	14	6	0.08	0.08	1	Left friend	7	12	5	0.07	0.07	1	Left friend	6	12	6	0.06	0.06	1
					4	Left friend	anonymized	anonymized	Left friend	49	56	7	0.49	0.49	1	Left friend	31	34	3	0.31	0.31	1	Left friend	25	27	2	0.25	0.25	1	Left friend	23	26	3	0.23	0.23	1
					3	Right friend	anonymized	anonymized	Right friend	2	8	10	0.02	0.02	1	Right friend	2	6	8	0.02	0.02	1	Right friend	4	5	9	0.04	0.04	1	Right friend	4	6	10	0.04	0.04	1
					2	Left friend	anonymized	anonymized	Right friend	6	10	16	-0.06	0.06	0	Right friend	4	10	14	-0.04	0.04	0	Right friend	3	9	12	-0.03	0.03	0	Right friend	4	8	12	-0.04	0.04	0
					1	Right friend	anonymized	anonymized	Right friend	49	7	56	0.49	0.49	1	Right friend	29	5	34	0.29	0.29	1	Right friend	23	4	27	0.23	0.23	1	Right friend	22	4	26	0.22	0.22	1
				Q 4	10	Right friend	anonymized	anonymized	Right friend	3	7	10	0.03	0.03	1	Right friend	8	3	11	0.08	0.08	1	Right friend	11	2	13	0.11	0.11	1	Right friend	24	3	27	0.24	0.24	1
					11	Left friend	anonymized	anonymized	Right friend	37	19	56	-0.37	0.37	0	Right friend	12	22	34	-0.12	0.12	0	Right friend	8	19	27	-0.08	0.08	0	Right friend	6	20	26	-0.06	0.06	0
					12	Left friend	anonymized	anonymized	Right friend	1	10	11	-0.01	0.01	0	Right friend	6	11	17	-0.06	0.06	0	Right friend	10	13	23	-0.1	0.1	0	Left friend	3	27	24	0.03	0.03	1
					7	Left friend	anonymized	anonymized	Left friend	49	56	7	0.49	0.49	1	Left friend	29	34	5	0.29	0.29	1	Left friend	23	27	4	0.23	0.23	1	Left friend	22	26	4	0.22	0.22	1
					8	Left friend	anonymized	anonymized	Left friend	3	10	7	0.03	0.03	1	Left friend	7	10	3	0.07	0.07	1	Left friend	7	9	2	0.07	0.07	1	Left friend	5	8	3	0.05	0.05	1
					9	Left friend	anonymized	anonymized	Right friend	0	10	10	0	0	0	Right friend	1	10	11	-0.01	0.01	0	Right friend	2	13	15	-0.02	0.02	0	Right friend	5	10	15	-0.05	0.05	0
					4	Left friend	anonymized	anonymized	Left friend	49	56	7	0.49	0.49	1	Left friend	31	34	3	0.31	0.31	1	Left friend	25	27	2	0.25	0.25	1	Left friend	23	26	3	0.23	0.23	1
					5	Left friend	anonymized	anonymized	Left friend	8	16	8	0.08	0.08	1	Left friend	8	14	6	0.08	0.08	1	Left friend	7	12	5	0.07	0.07	1	Left friend	6	12	6	0.06	0.06	1
					6	Left friend	anonymized	anonymized	Right friend	0	10	10	0	0	0	Right friend	2	8	10	-0.02	0.02	0	Right friend	0	9	9	0	0	0	Left friend	2	10	8	0.02	0.02	1
					1	Right friend	anonymized	anonymized	Right friend	49	7	56	0.49	0.49	1	Right friend	29	5	34	0.29	0.29	1	Right friend	23	4	27	0.23	0.23	1	Right friend	22	4	26	0.22	0.22	1
					2	Left friend	anonymized	anonymized	Right friend	6	10	16	-0.06	0.06	0	Right friend	4	10	14	-0.04	0.04	0	Right friend	3	9	12	-0.03	0.03	0	Right friend	4	8	12	-0.04	0.04	0
					3	Right friend	anonymized	anonymized	Right friend	2	8	10	0.02	0.02	1	Right friend	2	6	8	0.02	0.02	1	Right friend	4	5	9	0.04	0.04	1	Right friend	4	6	10	0.04	0.04	1
				Q 5	7	Left friend	anonymized	anonymized	Left friend	49	56	7	0.49	0.49	1	Left friend	29	34	5	0.29	0.29	1	Left friend	23	27	4	0.23	0.23	1	Left friend	22	26	4	0.22	0.22	1
					8	Left friend	anonymized	anonymized	Left friend	3	10	7	0.03	0.03	1	Left friend	7	10	3	0.07	0.07	1	Left friend	7	9	2	0.07	0.07	1	Left friend	5	8	3	0.05	0.05	1
					9	Left friend	anonymized	anonymized	Right friend	0	10	10	0	0	0	Right friend	1	10	11	-0.01	0.01	0	Right friend	2	13	15	-0.02	0.02	0	Right friend	5	10	15	-0.05	0.05	0
					10	Right friend	anonymized	anonymized	Right friend	3	7	10	0.03	0.03	1	Right friend	8	3	11	0.08	0.08	1	Right friend	11	2	13	0.11	0.11	1	Right friend	24	3	27	0.24	0.24	1
					11	Left friend	anonymized	anonymized	Right friend	37	19	56	-0.37	0.37	0	Right friend	12	22	34	-0.12	0.12	0	Right friend	8	19	27	-0.08	0.08	0	Right friend	6	20	26	-0.06	0.06	0
					12	Left friend	anonymized	anonymized	Right friend	1	10	11	-0.01	0.01	0	Right friend	6	11	17	-0.06	0.06	0	Right friend	10	13	23	-0.1	0.1	0	Left friend	3	27	24	0.03	0.03	1
					1	Right friend	anonymized	anonymized	Right friend	49	7	56	0.49	0.49	1	Right friend	29	5	34	0.29	0.29	1	Right friend	23	4	27	0.23	0.23	1	Right friend	22	4	26	0.22	0.22	1
					2	Left friend	anonymized	anonymized	Right friend	6	10	16	-0.06	0.06	0	Right friend	4	10	14	-0.04	0.04	0	Right friend	3	9	12	-0.03	0.03	0	Right friend	4	8	12	-0.04	0.04	0
					3	Right friend	anonymized	anonymized	Right friend	2	8	10	0.02	0.02	1	Right friend	2	6	8	0.02	0.02	1	Right friend	4	5	9	0.04	0.04	1	Right friend	4	6	10	0.04	0.04	1
					4	Left friend	anonymized	anonymized	Left friend	49	56	7	0.49	0.49	1	Left friend	31	34	3	0.31	0.31	1	Left friend	25	27	2	0.25	0.25	1	Left friend	23	26	3	0.23	0.23	1
					5	Left friend	anonymized	anonymized	Left friend	8	16	8	0.08	0.08	1	Left friend	8	14	6	0.08	0.08	1	Left friend	7	12	5	0.07	0.07	1	Left friend	6	12	6	0.06	0.06	1
					6	Left friend	anonymized	anonymized	Right friend	0	10	10	0	0	0	Right friend	2	8	10	-0.02	0.02	0	Right friend	0	9	9	0	0	0	Left friend	2	10	8	0.02	0.02	1
				Q 6	9	Left friend	anonymized	anonymized	Right friend	0	10	10	0	0	0	Right friend	1	10	11	-0.01	0.01	0	Right friend	2	13	15	-0.02	0.02	0	Right friend	5	10	15	-0.05	0.05	0
					8	Left friend	anonymized	anonymized	Left friend	3	10	7	0.03	0.03	1	Left friend	7	10	3	0.07	0.07	1	Left friend	7	9	2	0.07	0.07	1	Left friend	5	8	3	0.05	0.05	1
					7	Left friend	anonymized	anonymized	Left friend	49	56	7	0.49	0.49	1	Left friend	29	34	5	0.29	0.29	1	Left friend	23	27	4	0.23	0.23	1	Left friend	22	26	4	0.22	0.22	1
					12	Left friend	anonymized	anonymized	Right friend	1	10	11	-0.01	0.01	0	Right friend	6	11	17	-0.06	0.06	0	Right friend	10	13	23	-0.1	0.1	0	Left friend	3	27	24	0.03	0.03	1
					11	Left friend	anonymized	anonymized	Right friend	37	19	56	-0.37	0.37	0	Right friend	12	22	34	-0.12	0.12	0	Right friend	8	19	27	-0.08	0.08	0	Right friend	6	20	26	-0.06	0.06	0
					10	Right friend	anonymized	anonymized	Right friend	3	7	10	0.03	0.03	1	Right friend	8	3	11	0.08	0.08	1	Right friend	11	2	13	0.11	0.11	1	Right friend	24	3	27	0.24	0.24	1
					3	Right friend	anonymized	anonymized	Right friend	2	8	10	0.02	0.02	1	Right friend	2	6	8	0.02	0.02	1	Right friend	4	5	9	0.04	0.04	1	Right friend	4	6	10	0.04	0.04	1
					2	Left friend	anonymized	anonymized	Right friend	6	10	16	-0.06	0.06	0	Right friend	4	10	14	-0.04	0.04	0	Right friend	3	9	12	-0.03	0.03	0	Right friend	4	8	12	-0.04	0.04	0
					1	Right friend	anonymized	anonymized	Right friend	49	7	56	0.49	0.49	1	Right friend	29	5	34	0.29	0.29	1	Right friend	23	4	27	0.23	0.23	1	Right friend	22	4	26	0.22	0.22	1
					6	Left friend	anonymized	anonymized	Right friend	0	10	10	0	0	0	Right friend	2	8	10	-0.02	0.02	0	Right friend	0	9	9	0	0	0	Left friend	2	10	8	0.02	0.02	1
					5	Left friend	anonymized	anonymized	Left friend	8	16	8	0.08	0.08	1	Left friend	8	14	6	0.08	0.08	1	Left friend	7	12	5	0.07	0.07	1	Left friend	6	12	6	0.06	0.06	1
					4	Left friend	anonymized	anonymized	Left friend	49	56	7	0.49	0.49	1	Left friend	31	34	3	0.31	0.31	1	Left friend	25	27	2	0.25	0.25	1	Left friend	23	26	3	0.23	0.23	1
														12.42																					7.56

## Sheet: Main questionnaire PAR (5)
									SLOF							SAOF							SMOF							LRA
Conclusion:	[ , >		PAR	Q	P	ANSWER	left (name)	right (name)	CORRECT	Δ	SI left (z-val scaled)	SI right (z-val scaled)	score coeff.	possible MAX score (SUM)	score % (by SUM)	CORRECT	Δ	SI left (z-val scaled)	SI right (z-val scaled)	score coeff.	possible MAX score (SUM)	score % (by SUM)	CORRECT	Δ	SI left (z-val scaled)	SI right (z-val scaled)	score coeff.	possible MAX score (SUM)	score % (by SUM)	CORRECT	Δ	SI left (z-val scaled)	SI right (z-val scaled)	score coeff.	possible MAX score (SUM)	score % (by SUM)		SUM	SLOF score	SAOF score	SMOF score	LRA score
Δ 1	100 - 10		PAR 1	Q 1	1	Left friend	anonymized	anonymized	Left friend	49	56	7	0.49	0.49	1	Left friend	31	34	3	0.31	0.31	1	Left friend	25	27	2	0.25	0.25	1	Left friend	23	26	3	0.23	0.23	1		Q1	1.95	1.16	0.9	1
Δ 2	10 - 5				2	Right friend	anonymized	anonymized	Right friend	7	9	16	0.07	0.07	1	Right friend	10	4	14	0.1	0.1	1	Right friend	9	3	12	0.09	0.09	1	Right friend	9	3	12	0.09	0.09	1		Q2	2.11	1.5	1.16	0.94
Δ 3	5 - 0				3	Right friend	anonymized	anonymized	Right friend	3	12	15	0.03	0.03	1	Right friend	5	16	21	0.05	0.05	1	Right friend	3	16	19	0.03	0.03	1	Right friend	4	12	16	0.04	0.04	1		Q3	1.95	1.22	0.94	0.9
					4	Right friend	anonymized	anonymized	Right friend	47	9	56	0.47	0.47	1	Right friend	30	4	34	0.3	0.3	1	Right friend	24	3	27	0.24	0.24	1	Right friend	23	3	26	0.23	0.23	1		Q4	2.11	1.5	1.16	0.94
					5	Left friend	anonymized	anonymized	Left friend	6	16	10	0.06	0.06	1	Left friend	7	14	7	0.07	0.07	1	Left friend	5	12	7	0.05	0.05	1	Right friend	1	12	13	-0.01	0.01	0		Q5	2.11	1.5	1.16	0.94
					6	Left friend	anonymized	anonymized	Right friend	0	10	10	0	0	0	Right friend	3	7	10	-0.03	0.03	0	Right friend	2	7	9	-0.02	0.02	0	Left friend	5	13	8	0.05	0.05	1		Q6	2.11	1.5	1.16	0.94
					7	Right friend	anonymized	anonymized	Right friend	49	7	56	0.49	0.49	1	Right friend	31	3	34	0.31	0.31	1	Right friend	25	2	27	0.25	0.25	1	Right friend	23	3	26	0.23	0.23	1		AVG	2.05667	1.39667	1.08	0.943333
					8	Left friend	anonymized	anonymized	Right friend	2	10	12	-0.02	0.02	0	Right friend	6	10	16	-0.06	0.06	0	Right friend	7	9	16	-0.07	0.07	0	Right friend	4	8	12	-0.04	0.04	0		SUM	12.34	8.38	6.48	5.66
					9	Left friend	anonymized	anonymized	Left friend	3	15	12	0.03	0.03	1	Left friend	5	21	16	0.05	0.05	1	Left friend	3	19	16	0.03	0.03	1	Left friend	4	16	12	0.04	0.04	1		%	0.945166	0.879529	0.864865	0.86849
					10	Left friend	anonymized	anonymized	Left friend	49	56	7	0.49	0.49	1	Left friend	31	34	3	0.31	0.31	1	Left friend	25	27	2	0.25	0.25	1	Left friend	23	26	3	0.23	0.23	1
					11	Left friend	anonymized	anonymized	Right friend	8	10	18	-0.08	0.08	0	Right friend	11	10	21	-0.11	0.11	0	Right friend	9	9	18	-0.09	0.09	0	Right friend	7	8	15	-0.07	0.07	0
					12	Right friend	anonymized	anonymized	Left friend	8	18	10	-0.08	0.08	0	Left friend	14	21	7	-0.14	0.14	0	Left friend	11	18	7	-0.11	0.11	0	Left friend	2	15	13	-0.02	0.02	0
				Q 2	3	Right friend	anonymized	anonymized	Right friend	3	12	15	0.03	0.03	1	Right friend	5	16	21	0.05	0.05	1	Right friend	3	16	19	0.03	0.03	1	Right friend	4	12	16	0.04	0.04	1
					2	Right friend	anonymized	anonymized	Right friend	7	9	16	0.07	0.07	1	Right friend	10	4	14	0.1	0.1	1	Right friend	9	3	12	0.09	0.09	1	Right friend	9	3	12	0.09	0.09	1
					1	Left friend	anonymized	anonymized	Left friend	49	56	7	0.49	0.49	1	Left friend	31	34	3	0.31	0.31	1	Left friend	25	27	2	0.25	0.25	1	Left friend	23	26	3	0.23	0.23	1
					6	Right friend	anonymized	anonymized	Right friend	0	10	10	0	0	0	Right friend	3	7	10	0.03	0.03	1	Right friend	2	7	9	0.02	0.02	1	Left friend	5	13	8	-0.05	0.05	0
					5	Left friend	anonymized	anonymized	Left friend	6	16	10	0.06	0.06	1	Left friend	7	14	7	0.07	0.07	1	Left friend	5	12	7	0.05	0.05	1	Right friend	1	12	13	-0.01	0.01	0
					4	Right friend	anonymized	anonymized	Right friend	47	9	56	0.47	0.47	1	Right friend	30	4	34	0.3	0.3	1	Right friend	24	3	27	0.24	0.24	1	Right friend	23	3	26	0.23	0.23	1
					9	Left friend	anonymized	anonymized	Left friend	3	15	12	0.03	0.03	1	Left friend	5	21	16	0.05	0.05	1	Left friend	3	19	16	0.03	0.03	1	Left friend	4	16	12	0.04	0.04	1
					8	Left friend	anonymized	anonymized	Right friend	2	10	12	-0.02	0.02	0	Right friend	6	10	16	-0.06	0.06	0	Right friend	7	9	16	-0.07	0.07	0	Right friend	4	8	12	-0.04	0.04	0
					7	Right friend	anonymized	anonymized	Right friend	49	7	56	0.49	0.49	1	Right friend	31	3	34	0.31	0.31	1	Right friend	25	2	27	0.25	0.25	1	Right friend	23	3	26	0.23	0.23	1
					12	Left friend	anonymized	anonymized	Left friend	8	18	10	0.08	0.08	1	Left friend	14	21	7	0.14	0.14	1	Left friend	11	18	7	0.11	0.11	1	Left friend	2	15	13	0.02	0.02	1			SLOF score	SAOF score	SMOF score	LRA score
					11	Left friend	anonymized	anonymized	Right friend	8	10	18	-0.08	0.08	0	Right friend	11	10	21	-0.11	0.11	0	Right friend	9	9	18	-0.09	0.09	0	Right friend	7	8	15	-0.07	0.07	0		%
					10	Left friend	anonymized	anonymized	Left friend	49	56	7	0.49	0.49	1	Left friend	31	34	3	0.31	0.31	1	Left friend	25	27	2	0.25	0.25	1	Left friend	23	26	3	0.23	0.23	1		Q1	0.666667	0.666667	0.666667	0.666667
				Q 3	12	Right friend	anonymized	anonymized	Left friend	8	18	10	-0.08	0.08	0	Left friend	14	21	7	-0.14	0.14	0	Left friend	11	18	7	-0.11	0.11	0	Left friend	2	15	13	-0.02	0.02	0		Q2	0.75	0.833333	0.833333	0.666667
					11	Left friend	anonymized	anonymized	Right friend	8	10	18	-0.08	0.08	0	Right friend	11	10	21	-0.11	0.11	0	Right friend	9	9	18	-0.09	0.09	0	Right friend	7	8	15	-0.07	0.07	0		Q3	0.666667	0.75	0.75	0.583333
					10	Left friend	anonymized	anonymized	Left friend	49	56	7	0.49	0.49	1	Left friend	31	34	3	0.31	0.31	1	Left friend	25	27	2	0.25	0.25	1	Left friend	23	26	3	0.23	0.23	1		Q4	0.75	0.833333	0.833333	0.666667
					9	Left friend	anonymized	anonymized	Left friend	3	15	12	0.03	0.03	1	Left friend	5	21	16	0.05	0.05	1	Left friend	3	19	16	0.03	0.03	1	Left friend	4	16	12	0.04	0.04	1		Q5	0.75	0.833333	0.833333	0.666667
					8	Left friend	anonymized	anonymized	Right friend	2	10	12	-0.02	0.02	0	Right friend	6	10	16	-0.06	0.06	0	Right friend	7	9	16	-0.07	0.07	0	Right friend	4	8	12	-0.04	0.04	0		Q6	0.75	0.833333	0.833333	0.666667
					7	Right friend	anonymized	anonymized	Right friend	49	7	56	0.49	0.49	1	Right friend	31	3	34	0.31	0.31	1	Right friend	25	2	27	0.25	0.25	1	Right friend	23	3	26	0.23	0.23	1		AVG	0.722222	0.791667	0.791667	0.652778
					6	Right friend	anonymized	anonymized	Right friend	0	10	10	0	0	0	Right friend	3	7	10	0.03	0.03	1	Right friend	2	7	9	0.02	0.02	1	Left friend	5	13	8	-0.05	0.05	0
					5	Left friend	anonymized	anonymized	Left friend	6	16	10	0.06	0.06	1	Left friend	7	14	7	0.07	0.07	1	Left friend	5	12	7	0.05	0.05	1	Right friend	1	12	13	-0.01	0.01	0
					4	Right friend	anonymized	anonymized	Right friend	47	9	56	0.47	0.47	1	Right friend	30	4	34	0.3	0.3	1	Right friend	24	3	27	0.24	0.24	1	Right friend	23	3	26	0.23	0.23	1
					3	Right friend	anonymized	anonymized	Right friend	3	12	15	0.03	0.03	1	Right friend	5	16	21	0.05	0.05	1	Right friend	3	16	19	0.03	0.03	1	Right friend	4	12	16	0.04	0.04	1
					2	Right friend	anonymized	anonymized	Right friend	7	9	16	0.07	0.07	1	Right friend	10	4	14	0.1	0.1	1	Right friend	9	3	12	0.09	0.09	1	Right friend	9	3	12	0.09	0.09	1
					1	Left friend	anonymized	anonymized	Left friend	49	56	7	0.49	0.49	1	Left friend	31	34	3	0.31	0.31	1	Left friend	25	27	2	0.25	0.25	1	Left friend	23	26	3	0.23	0.23	1
				Q 4	10	Left friend	anonymized	anonymized	Left friend	49	56	7	0.49	0.49	1	Left friend	31	34	3	0.31	0.31	1	Left friend	25	27	2	0.25	0.25	1	Left friend	23	26	3	0.23	0.23	1
					11	Left friend	anonymized	anonymized	Right friend	8	10	18	-0.08	0.08	0	Right friend	11	10	21	-0.11	0.11	0	Right friend	9	9	18	-0.09	0.09	0	Right friend	7	8	15	-0.07	0.07	0
					12	Left friend	anonymized	anonymized	Left friend	8	18	10	0.08	0.08	1	Left friend	14	21	7	0.14	0.14	1	Left friend	11	18	7	0.11	0.11	1	Left friend	2	15	13	0.02	0.02	1
					7	Right friend	anonymized	anonymized	Right friend	49	7	56	0.49	0.49	1	Right friend	31	3	34	0.31	0.31	1	Right friend	25	2	27	0.25	0.25	1	Right friend	23	3	26	0.23	0.23	1
					8	Left friend	anonymized	anonymized	Right friend	2	10	12	-0.02	0.02	0	Right friend	6	10	16	-0.06	0.06	0	Right friend	7	9	16	-0.07	0.07	0	Right friend	4	8	12	-0.04	0.04	0
					9	Left friend	anonymized	anonymized	Left friend	3	15	12	0.03	0.03	1	Left friend	5	21	16	0.05	0.05	1	Left friend	3	19	16	0.03	0.03	1	Left friend	4	16	12	0.04	0.04	1
					4	Right friend	anonymized	anonymized	Right friend	47	9	56	0.47	0.47	1	Right friend	30	4	34	0.3	0.3	1	Right friend	24	3	27	0.24	0.24	1	Right friend	23	3	26	0.23	0.23	1
					5	Left friend	anonymized	anonymized	Left friend	6	16	10	0.06	0.06	1	Left friend	7	14	7	0.07	0.07	1	Left friend	5	12	7	0.05	0.05	1	Right friend	1	12	13	-0.01	0.01	0
					6	Right friend	anonymized	anonymized	Right friend	0	10	10	0	0	0	Right friend	3	7	10	0.03	0.03	1	Right friend	2	7	9	0.02	0.02	1	Left friend	5	13	8	-0.05	0.05	0
					1	Left friend	anonymized	anonymized	Left friend	49	56	7	0.49	0.49	1	Left friend	31	34	3	0.31	0.31	1	Left friend	25	27	2	0.25	0.25	1	Left friend	23	26	3	0.23	0.23	1
					2	Right friend	anonymized	anonymized	Right friend	7	9	16	0.07	0.07	1	Right friend	10	4	14	0.1	0.1	1	Right friend	9	3	12	0.09	0.09	1	Right friend	9	3	12	0.09	0.09	1
					3	Right friend	anonymized	anonymized	Right friend	3	12	15	0.03	0.03	1	Right friend	5	16	21	0.05	0.05	1	Right friend	3	16	19	0.03	0.03	1	Right friend	4	12	16	0.04	0.04	1
				Q 5	7	Right friend	anonymized	anonymized	Right friend	49	7	56	0.49	0.49	1	Right friend	31	3	34	0.31	0.31	1	Right friend	25	2	27	0.25	0.25	1	Right friend	23	3	26	0.23	0.23	1
					8	Left friend	anonymized	anonymized	Right friend	2	10	12	-0.02	0.02	0	Right friend	6	10	16	-0.06	0.06	0	Right friend	7	9	16	-0.07	0.07	0	Right friend	4	8	12	-0.04	0.04	0
					9	Left friend	anonymized	anonymized	Left friend	3	15	12	0.03	0.03	1	Left friend	5	21	16	0.05	0.05	1	Left friend	3	19	16	0.03	0.03	1	Left friend	4	16	12	0.04	0.04	1
					10	Left friend	anonymized	anonymized	Left friend	49	56	7	0.49	0.49	1	Left friend	31	34	3	0.31	0.31	1	Left friend	25	27	2	0.25	0.25	1	Left friend	23	26	3	0.23	0.23	1
					11	Left friend	anonymized	anonymized	Right friend	8	10	18	-0.08	0.08	0	Right friend	11	10	21	-0.11	0.11	0	Right friend	9	9	18	-0.09	0.09	0	Right friend	7	8	15	-0.07	0.07	0
					12	Left friend	anonymized	anonymized	Left friend	8	18	10	0.08	0.08	1	Left friend	14	21	7	0.14	0.14	1	Left friend	11	18	7	0.11	0.11	1	Left friend	2	15	13	0.02	0.02	1
					1	Left friend	anonymized	anonymized	Left friend	49	56	7	0.49	0.49	1	Left friend	31	34	3	0.31	0.31	1	Left friend	25	27	2	0.25	0.25	1	Left friend	23	26	3	0.23	0.23	1
					2	Right friend	anonymized	anonymized	Right friend	7	9	16	0.07	0.07	1	Right friend	10	4	14	0.1	0.1	1	Right friend	9	3	12	0.09	0.09	1	Right friend	9	3	12	0.09	0.09	1
					3	Right friend	anonymized	anonymized	Right friend	3	12	15	0.03	0.03	1	Right friend	5	16	21	0.05	0.05	1	Right friend	3	16	19	0.03	0.03	1	Right friend	4	12	16	0.04	0.04	1
					4	Right friend	anonymized	anonymized	Right friend	47	9	56	0.47	0.47	1	Right friend	30	4	34	0.3	0.3	1	Right friend	24	3	27	0.24	0.24	1	Right friend	23	3	26	0.23	0.23	1
					5	Left friend	anonymized	anonymized	Left friend	6	16	10	0.06	0.06	1	Left friend	7	14	7	0.07	0.07	1	Left friend	5	12	7	0.05	0.05	1	Right friend	1	12	13	-0.01	0.01	0
					6	Right friend	anonymized	anonymized	Right friend	0	10	10	0	0	0	Right friend	3	7	10	0.03	0.03	1	Right friend	2	7	9	0.02	0.02	1	Left friend	5	13	8	-0.05	0.05	0
				Q 6	9	Left friend	anonymized	anonymized	Left friend	3	15	12	0.03	0.03	1	Left friend	5	21	16	0.05	0.05	1	Left friend	3	19	16	0.03	0.03	1	Left friend	4	16	12	0.04	0.04	1
					8	Left friend	anonymized	anonymized	Right friend	2	10	12	-0.02	0.02	0	Right friend	6	10	16	-0.06	0.06	0	Right friend	7	9	16	-0.07	0.07	0	Right friend	4	8	12	-0.04	0.04	0
					7	Right friend	anonymized	anonymized	Right friend	49	7	56	0.49	0.49	1	Right friend	31	3	34	0.31	0.31	1	Right friend	25	2	27	0.25	0.25	1	Right friend	23	3	26	0.23	0.23	1
					12	Left friend	anonymized	anonymized	Left friend	8	18	10	0.08	0.08	1	Left friend	14	21	7	0.14	0.14	1	Left friend	11	18	7	0.11	0.11	1	Left friend	2	15	13	0.02	0.02	1
					11	Left friend	anonymized	anonymized	Right friend	8	10	18	-0.08	0.08	0	Right friend	11	10	21	-0.11	0.11	0	Right friend	9	9	18	-0.09	0.09	0	Right friend	7	8	15	-0.07	0.07	0
					10	Left friend	anonymized	anonymized	Left friend	49	56	7	0.49	0.49	1	Left friend	31	34	3	0.31	0.31	1	Left friend	25	27	2	0.25	0.25	1	Left friend	23	26	3	0.23	0.23	1
					3	Right friend	anonymized	anonymized	Right friend	3	12	15	0.03	0.03	1	Right friend	5	16	21	0.05	0.05	1	Right friend	3	16	19	0.03	0.03	1	Right friend	4	12	16	0.04	0.04	1
					2	Right friend	anonymized	anonymized	Right friend	7	9	16	0.07	0.07	1	Right friend	10	4	14	0.1	0.1	1	Right friend	9	3	12	0.09	0.09	1	Right friend	9	3	12	0.09	0.09	1
					1	Left friend	anonymized	anonymized	Left friend	49	56	7	0.49	0.49	1	Left friend	31	34	3	0.31	0.31	1	Left friend	25	27	2	0.25	0.25	1	Left friend	23	26	3	0.23	0.23	1
					6	Right friend	anonymized	anonymized	Right friend	0	10	10	0	0	0	Right friend	3	7	10	0.03	0.03	1	Right friend	2	7	9	0.02	0.02	1	Left friend	5	13	8	-0.05	0.05	0
					5	Left friend	anonymized	anonymized	Left friend	6	16	10	0.06	0.06	1	Left friend	7	14	7	0.07	0.07	1	Left friend	5	12	7	0.05	0.05	1	Right friend	1	12	13	-0.01	0.01	0
					4	Right friend	anonymized	anonymized	Right friend	47	9	56	0.47	0.47	1	Right friend	30	4	34	0.3	0.3	1	Right friend	24	3	27	0.24	0.24	1	Right friend	23	3	26	0.23	0.23	1
														13.86																					7.68

[truncated: 11 more sheets: Main questionnaire PAR (6), Main questionnaire PAR (7), Main questionnaire PAR (8), Main questionnaire PAR (9), Main questionnaire PAR (10), Main questionnaire PAR (11), Main questionnaire PAR (12), Main questionnaire PAR (13), Main questionnaire PAR (14), Main questionnaire PAR (15), Main questionnaire PAR (16)]
